# Supplementary material for: Divergent reactivity of α-oximino carbenoids: facile access to 2-isoxazolines and 2H-azirines
Source: Royal Society of Chemistry journal article supplement (doi:10.1039/c1cc11683e), 2011-01-01

## Supporting Information

### Divergent Reactivity of $\alpha$ -Oximino Carbenoids: Facile Access to 2-Isoxazolines and 1-Azirines

Xinxin Qi,<sup>†</sup> Yaojia Jiang,<sup>†</sup> and Cheol-Min Park\*

#### Table of Contents

|                                                                                                 |    |
|-------------------------------------------------------------------------------------------------|----|
| General methods -----                                                                           | 2  |
| General procedure for $\beta$ -oximino esters and spectral data -----                           | 3  |
| General procedure for $\alpha$ -diazo oxime ethers and their spectral data -----                | 10 |
| General procedure for 2-isoxazoles and 1-azirines -----                                         | 16 |
| Spectral data for 2-isoxazoles and 1-azirines -----                                             | 16 |
| General procedure and spectral data for pyrrole <b>4</b> -----                                  | 27 |
| NOESY spectra of <b>2g</b> and <b>2g'</b> -----                                                 | 28 |
| <sup>1</sup> H and <sup>13</sup> C NMR spectra of $\beta$ -oximino esters -----                 | 29 |
| <sup>1</sup> H and <sup>13</sup> C NMR spectra of $\alpha$ -diazo $\beta$ -oximino esters ----- | 43 |
| <sup>1</sup> H and <sup>13</sup> C NMR spectra of 2-isoxazoles and 1-azirines -----             | 57 |
| <sup>1</sup> H and <sup>13</sup> C NMR spectra of pyrrole -----                                 | 83 |

**General methods:** All reactions were carried out in flame or oven dried glasswares under nitrogen atmosphere with freshly distilled dry solvents under anhydrous conditions unless otherwise indicated. Flash column chromatography was performed with silica gel 60 (230 – 400 mesh) or aluminium oxide. Chromatograms were visualized by fluorescence quenching with UV light at 254 nm or by staining using base solution of potassium permanganate and molybdate. NMR spectra were recorded at room temperature on 300 M Hz Bruker ACF 300, 400 M Hz Bruker DPX 400, 500 M Hz Bruker AMX 500, and 400 M Hz JEOL ECA 400 NMR spectrometers. The residual solvent signals were taken as the reference (0.00 ppm or 7.26 ppm for  $^1\text{H}$  NMR spectra and 77.0 ppm for  $^{13}\text{C}$  NMR spectra in  $\text{CDCl}_3$ ). Chemical shift ( $\delta$ ) is reported in ppm, coupling constants ( $J$ ) are given in Hz. The following abbreviations classify the multiplicity: s = singlet, d = doublet, t = triplet, m = multiplet, dd = doublet of doublet, q = quartet and br = broad signal. HRMS (ESI) spectra were recorded on a Waters Q-Tof premier<sup>TM</sup> mass spectrometer.

**Materials:** All solvents were distilled under nitrogen from the following drying agents immediately before use: acetonitrile and dichloroethane were distilled from  $\text{P}_2\text{O}_5$ . Anhydrous pyridine and DBU were purchased from commercial suppliers and used without further purification.

### General procedure for $\beta$ -oximino esters:

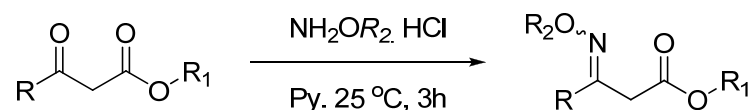

To a solution of  $\beta$ -ketoester (1.0 eq.) in pyridine at room temperature was added alkoxyamine hydrochloride (1.1 eq.) in one portion and the reaction mixture was stirred at RT for 3 h. Upon completion of the reaction as indicated by TLC, it was extracted with ethyl acetate, washed with water, brine and dried over anhydrous  $\text{Na}_2\text{SO}_4$ . The crude material was purified by column chromatography using hexane:ethyl acetate (19:1).

### Dimethyl 2-(cyclohexyloxyimino)succinate:

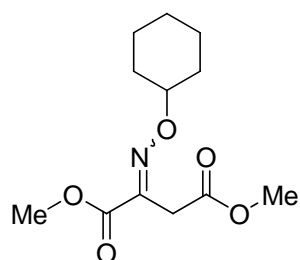

The title compound was prepared according to the general procedure. The product was obtained as colorless oil (*cis:trans* = <5:>95). Yield: 82%.  $^1\text{H}$  NMR (400 MHz,  $\text{CDCl}_3$ )  $\delta$  4.39-4.32 (m, 1H), 3.88 (s, 3H), 3.69 (s, 3H), 3.64 (s, 2H), 1.94-1.91 (m, 2H), 1.72-1.68 (m, 2H), 1.57-1.46 (m, 3H), 1.40-1.27 (m, 3H);  $^{13}\text{C}$  NMR (100 MHz,  $\text{CDCl}_3$ )  $\delta$  168.6, 163.7, 144.7, 83.3, 52.9, 52.1, 31.4, 31.2, 25.4, 23.3; HRMS (ESI)  $m/z$   $[\text{M}+\text{H}]^+$ : Calcd for  $\text{C}_{12}\text{H}_{20}\text{NO}_5$ : 258.1341. Found: 258.1347.

### Dimethyl 2-(isopropoxyimino)succinate:

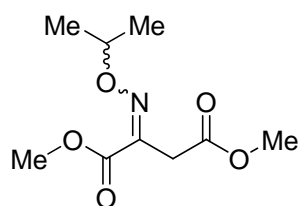

The title compound was prepared according to the general procedure. The product was obtained as colorless oil (*cis:trans* = <5:>95). Yield: 75%.  $^1\text{H}$  NMR (400 MHz,  $\text{CDCl}_3$ )  $\delta$

4.63-4.57 (m, 1H), 3.88 (s, 3H), 3.69 (s, 3H), 3.62 (s, 2H), 1.29 (d,  $J = 6.4$  Hz, 6H);  $^{13}\text{C}$  NMR (100 MHz,  $\text{CDCl}_3$ )  $\delta$  168.7, 163.7, 144.6, 76.7, 52.9, 52.1, 31.1, 21.5; HRMS (ESI)  $m/z$   $[\text{M}+\text{H}]^+$ : Calcd for  $\text{C}_9\text{H}_{16}\text{NO}_5$ : 218.1028. Found: 218.1031.

**Dimethyl 2-(benzyloxyimino)succinate:**

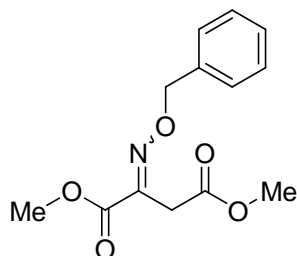

The title compound was prepared according to the general procedure. The product was obtained as pale yellow oil (*cis:trans* = <5:>95). Yield: 86%.  $^1\text{H}$  NMR (400 MHz,  $\text{CDCl}_3$ )  $\delta$  7.37-7.32 (m, 5H), 5.33 (s, 2H), 3.88 (s, 3H), 3.66 (s, 2H), 3.63 (s, 3H);  $^{13}\text{C}$  NMR (100 MHz,  $\text{CDCl}_3$ )  $\delta$  168.3, 163.4, 145.7, 136.1, 128.5, 128.4, 128.2, 76.7, 53.0, 52.2, 31.3; HRMS (ESI)  $m/z$   $[\text{M}+\text{H}]^+$ : Calcd for  $\text{C}_{14}\text{H}_{12}\text{N}_2\text{O}_5$ : 266.1042. Found: 266.1030.

**Dimethyl 2-(4-methoxybenzyloxyimino)succinate:**

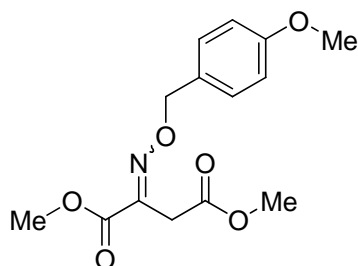

The title compound was prepared according to the general procedure. The product was obtained as colorless oil (*cis:trans* = <5:>95). Yield: 86%.  $^1\text{H}$  NMR (400 MHz,  $\text{CDCl}_3$ )  $\delta$  7.28 (d,  $J = 8.4$  Hz, 2H), 6.89 (d,  $J = 8.4$  Hz, 2H), 5.25 (s, 2H), 3.88 (s, 3H), 3.81 (s, 3H), 3.63 (s, 2H), 3.62 (s, 3H);  $^{13}\text{C}$  NMR (100 MHz,  $\text{CDCl}_3$ )  $\delta$  168.4, 163.4, 159.8, 145.4, 130.1, 128.1, 113.9, 76.7, 55.2, 53.0, 52.2, 31.2; HRMS (ESI)  $m/z$   $[\text{M}+\text{H}]^+$ : Calcd for  $\text{C}_{14}\text{H}_{18}\text{NO}_6$ : 296.1134. Found: 296.1146.

**Dimethyl 2-(4-chlorobenzyloxyimino)succinate:**

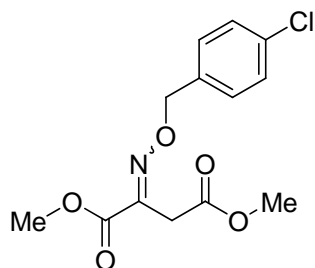

The title compound was prepared according to the general procedure. The product was obtained as colorless oil (*cis:trans* = <5:>95). Yield: 83%.  $^1\text{H}$  NMR (400 MHz,  $\text{CDCl}_3$ )  $\delta$  7.34 (d,  $J$  = 8.4 Hz, 2H), 7.27 (d,  $J$  = 8.4 Hz, 2H), 5.29 (s, 2H), 3.88 (s, 3H), 3.66 (s, 2H), 3.64 (s, 3H);  $^{13}\text{C}$  NMR (100 MHz,  $\text{CDCl}_3$ )  $\delta$  168.2, 163.2, 145.9, 134.6, 134.2, 129.5, 128.7, 76.7, 53.0, 52.2, 31.2; HRMS (ESI)  $m/z$   $[\text{M}+\text{H}]^+$ : Calcd for  $\text{C}_{13}\text{H}_{15}\text{NO}_5\text{Cl}$ : 300.0639. Found: 300.0636.

**Dimethyl 2-(4-nitrobenzyloxyimino)succinate:**

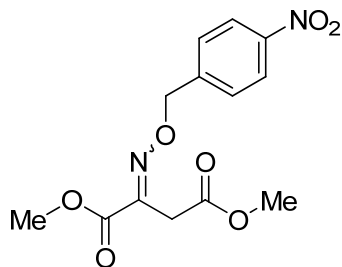

The title compound was prepared according to the general procedure. The product was obtained as colorless oil (*cis:trans* = <5:>95). Yield: 80%.  $^1\text{H}$  NMR (400 MHz,  $\text{CDCl}_3$ )  $\delta$  8.23 (d,  $J$  = 8.8 Hz, 2H), 7.49 (d,  $J$  = 8.8 Hz, 2H), 5.43 (s, 2H), 3.88 (s, 3H), 3.71 (s, 2H), 3.69 (s, 3H);  $^{13}\text{C}$  NMR (100 MHz,  $\text{CDCl}_3$ )  $\delta$  168.0, 163.0, 147.8, 146.6, 143.7, 128.2, 123.8, 76.4, 53.1, 52.4, 31.3; HRMS (ESI)  $m/z$   $[\text{M}+\text{H}]^+$ : Calcd for  $\text{C}_{13}\text{H}_{15}\text{N}_2\text{O}_7$ : 311.0879. Found: 311.0879.

**Dimethyl 2-(1-phenylethoxyimino)succinate:**

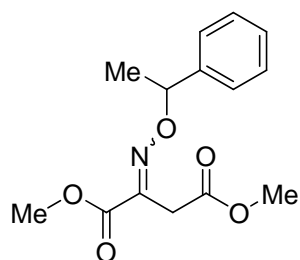

The title compound was prepared according to the general procedure. The product was obtained as colorless oil (*cis:trans* = <5:>95). Yield: 84%.  $^1\text{H}$  NMR (400 MHz,  $\text{CDCl}_3$ )  $\delta$  7.37-7.28 (m, 5H), 5.49 (q,  $J$  = 6.4 Hz, 1H), 3.85 (s, 3H), 3.68 (s, 2H), 3.66 (s, 3H), 1.60 (d,  $J$  = 6.8 Hz, 3H);  $^{13}\text{C}$  NMR (100 MHz,  $\text{CDCl}_3$ )  $\delta$  168.4, 163.5, 145.3, 141.5, 128.4, 127.9, 126.1, 83.7, 52.9, 52.2, 31.4, 21.9; HRMS (ESI)  $m/z$   $[\text{M}+\text{H}]^+$ : Calcd for  $\text{C}_{14}\text{H}_{18}\text{NO}_5$ : 280.1185. Found: 280.1189.

#### Benzyl 3-(isopropoxyimino)butanoate:

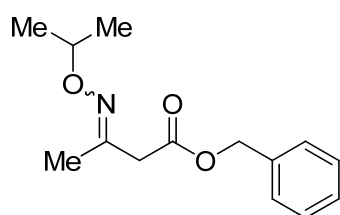

The title compound was prepared according to the general procedure. The product was obtained as colorless oil (*cis:trans* = 43:57). Yield: 80%.  $^1\text{H}$  NMR (400 MHz,  $\text{CDCl}_3$ )  $\delta$  7.36-7.30 (m, 5H), 5.15 & 5.14 (s, 2H), 4.33-4.25 (m, 1H), 3.36 & 3.26 (s, 2H), 1.96 & 1.90 (s, 3H), 1.22 & 1.16 (d,  $J$  = 6.4 Hz; d,  $J$  = 6.0 Hz, 6H);  $^{13}\text{C}$  NMR (100 MHz,  $\text{CDCl}_3$ )  $\delta$  169.7, 168.9, 150.2, 149.2, 135.7, 135.6, 128.5, 128.5, 128.3, 128.2, 128.1, 75.1, 75.0, 66.7, 66.5, 41.5, 35.5, 21.6, 21.6, 20.7, 14.6; HRMS (ESI)  $m/z$   $[\text{M}+\text{H}]^+$ : Calcd for  $\text{C}_{14}\text{H}_{20}\text{NO}_3$ : 250.1443. Found: 250.1447.

#### Methyl 3-(isopropoxyimino)-4-phenylbutanoate:

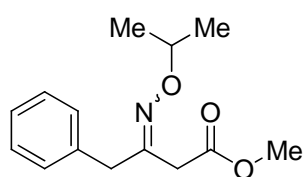

The title compound was prepared according to the general procedure. The product was obtained as colorless oil (*cis:trans* = 28 : 72). Yield: 88%.  $^1\text{H}$  NMR (400 MHz,  $\text{CDCl}_3$ )  $\delta$  7.32-1.18 (m, 5H), 4.41-4.35 (m, 1H), 3.80 & 3.62 (s, 2H), 3.62 & 3.61 (s, 3H), 3.17 & 3.12 (s, 2H), 1.27 & 1.23 (d,  $J$  = 6.0 Hz; d,  $J$  = 6.4 Hz, 6H);  $^{13}\text{C}$  NMR (100 MHz,  $\text{CDCl}_3$ )  $\delta$  170.2, 169.4, 151.8, 151.5, 136.2, 129.2, 129.1, 128.5, 128.5, 126.8, 126.5, 75.4, 75.2, 51.9, 51.8, 40.8, 38.8, 34.0, 33.2, 21.6, 21.6; HRMS (ESI)  $m/z$   $[\text{M}+\text{H}]^+$ : Calcd for  $\text{C}_{14}\text{H}_{20}\text{NO}_3$ : 250.1443. Found: 250.1442.

***tert*-Butyl 3-(isopropoxyimino)-4-phenylbutanoate:**

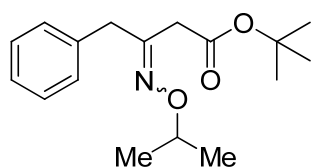

The title compound was prepared according to the general procedure. The product was obtained as colorless oil (*cis:trans* = 25 : 75). Yield: 79%.  $^1\text{H}$  NMR (400 MHz,  $\text{CDCl}_3$ )  $\delta$  7.32-7.18 (m, 5H), 4.41-4.37 (m, 1H), 3.79 & 3.60 (s, 2H), 3.09 & 3.02 (s, 2H), 1.41 & 1.40 (s, 9H), 1.27 & 1.24 (d,  $J$  = 6.4 Hz; d,  $J$  = 6.4 Hz, 6H);  $^{13}\text{C}$  NMR (100 MHz,  $\text{CDCl}_3$ )  $\delta$  169.1, 168.1, 152.5, 152.1, 136.5, 136.5, 129.3, 129.3, 128.6, 128.5, 126.8, 126.5, 81.2, 80.9, 75.3, 75.2, 41.0, 40.2, 34.8, 34.1, 28.2, 28.0, 27.9, 21.7, 21.7; HRMS (ESI)  $m/z$   $[\text{M}+\text{H}]^+$ : Calcd for  $\text{C}_{17}\text{H}_{26}\text{NO}_3$ : 292.1913. Found: 292.1917.

**Methyl 3-(isopropoxyimino)-4-(4-methoxyphenyl)butanoate:**

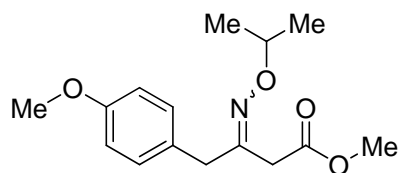

The title compound was prepared according to the general procedure. The product was obtained as pale yellow oil (*cis:trans* = 31:69). Yield: 82%.  $^1\text{H}$  NMR (400 MHz,  $\text{CDCl}_3$ )  $\delta$  7.15-7.09 (m, 2H), 6.85-6.81 (m, 2H), 4.42-4.34 (m, 1H), 3.79 (s, 3H), 3.73 & 3.55 (s, 2H), 3.63 & 3.62 (s, 3H), 3.15 & 3.11 (s, 2H), 1.27-1.23 (d,  $J$  = 6.0 Hz; d,  $J$  = 6.4 Hz, 6H);  $^{13}\text{C}$  NMR (100 MHz,  $\text{CDCl}_3$ )  $\delta$  170.3, 169.5, 158.5, 158.3, 152.4, 151.9, 130.3, 130.2, 128.2,

128.2, 114.0, 113.9, 75.4, 75.2, 55.2, 52.0, 51.8, 40.0, 38.8, 33.2, 21.7, 21.6; HRMS (ESI)  $m/z$   $[M+H]^+$ : Calcd for  $C_{15}H_{22}NO_4$ : 280.1549. Found: 280.1543.

**Methyl 4-(4-chlorophenyl)-3-(isopropoxyimino)butanoate:**

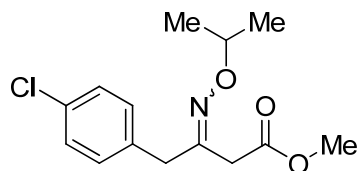

The title compound was prepared according to the general procedure. The product was obtained as colorless oil (*cis:trans* = 27:73). Yield: 81%.  $^1H$  NMR (300 MHz,  $CDCl_3$ )  $\delta$  7.29-7.24 (m, 2H), 7.17-7.11 (m, 2H), 4.41-4.33 (m, 1H), 3.76 & 3.58 (s, 2H), 3.63 & 3.62 (s, 3H), 3.16 & 3.12 (s, 2H), 1.26 & 1.23 (d,  $J$  = 6.0 Hz; d,  $J$  = 6.3 Hz, 6H);  $^{13}C$  NMR (75 MHz,  $CDCl_3$ )  $\delta$  170.1, 169.3, 162.3, 151.3, 151.0, 134.8, 132.8, 130.6, 130.5, 128.7, 128.6, 75.6, 75.4, 52.0, 51.9, 40.2, 38.9, 33.5, 33.2, 21.7, 21.6; HRMS (ESI)  $m/z$   $[M+H]^+$ : Calcd for  $C_{14}H_{19}NO_3Cl$ : 284.1053. Found: 284.1058.

**Methyl 4-(3-chlorophenyl)-3-(isopropoxyimino)butanoate:**

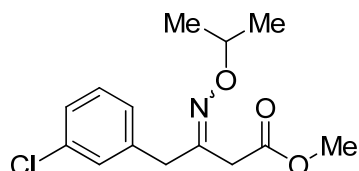

The title compound was prepared according to the general procedure. The product was obtained as colorless oil (*cis:trans* = 27:73). Yield: 78%.  $^1H$  NMR (400 MHz,  $CDCl_3$ )  $\delta$  7.24-7.20 (m, 3H), 7.12-7.07 (m, 1H), 4.43-4.35 (m, 1H), 3.77 & 3.60 (s, 2H), 3.64 & 3.63 (s, 3H), 3.17 & 3.13 (s, 2H), 1.27 & 1.23 (d,  $J$  = 6.4 Hz; d,  $J$  = 6.4 Hz, 6H);  $^{13}C$  NMR (100 MHz,  $CDCl_3$ )  $\delta$  170.1, 169.3, 151.0, 150.7, 138.4, 138.3, 134.4, 134.3, 129.8, 129.7, 129.4, 129.3, 127.4, 127.1, 126.8, 75.6, 75.5, 52.0, 51.9, 40.5, 38.9, 33.8, 33.3, 21.7, 21.6; HRMS (ESI)  $m/z$   $[M+H]^+$ : Calcd for  $C_{14}H_{19}NO_3Cl$ : 284.1053. Found: 284.1048.

**Methyl 3-(isopropoxyimino)-5-phenylpentanoate:**

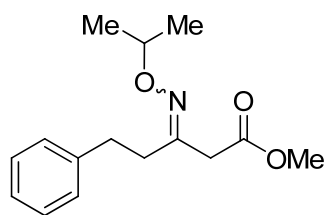

The title compound was prepared according to the general procedure. The product was obtained as colorless oil (*cis:trans* = 40:60). Yield: 92%. <sup>1</sup>H NMR (400 MHz, CDCl<sub>3</sub>) δ 7.29-7.25 (m, 2H), 7.21-7.18 (m, 3H), 4.35-4.28 (m, 1H), 3.68 & 3.67 (s, 3H), 3.27 & 3.11 (s, 2H), 2.89-2.80 (m, 2H), 2.69-2.56 (m, 2H), 1.23 & 1.18 (d, *J* = 6.0 Hz, d, *J* = 6.0 Hz, 6H); <sup>13</sup>C NMR (100 MHz, CDCl<sub>3</sub>) δ 170.4, 169.7, 153.2, 151.7, 141.2, 141.2, 128.5, 128.4, 128.3, 126.1, 75.2, 75.2, 52.1, 51.9, 40.1, 36.7, 34.6, 32.4, 31.5, 30.5, 21.7, 21.6; HRMS (ESI) *m/z* [M+H]<sup>+</sup>: Calcd for C<sub>15</sub>H<sub>22</sub>NO<sub>3</sub>: 264.1600. Found: 264.1598.

### General procedure for $\alpha$ -diazo oxime ethers (1a-n):

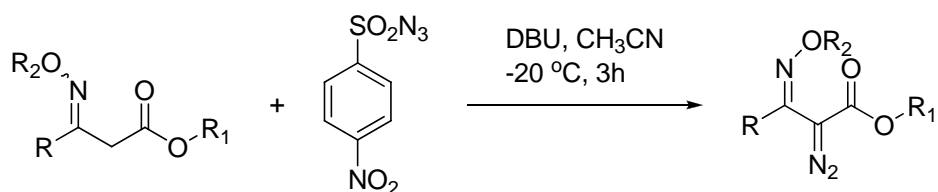

To a solution of  $\beta$ -oximino ester (1.0 eq.) and 4-nitrobenzenesulfonyl azide (1.1 eq.) in  $\text{CH}_3\text{CN}$  at  $-20\text{ }^\circ\text{C}$  was added DBU (1.1 eq.) dropwise. The resulting orange color solution was stirred for 2h at  $-20\text{ }^\circ\text{C}$  and slowly brought to RT. Upon completion of the reaction as indicated by TLC, the solvent was removed under reduced pressure and the crude material was purified by column chromatography using hexane:ethyl acetate (19:1).

### (*E*)-dimethyl 2-(cyclohexoxyimino)-3-diazosuccinate (1a):

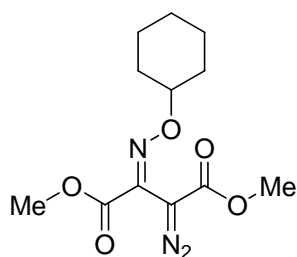

The title compound was prepared according to the general procedure. The product was obtained as yellow oil. Yield: 84%.  $^1\text{H}$  NMR (400 MHz,  $\text{CDCl}_3$ )  $\delta$  4.32-4.26 (m, 1H), 3.88 (s, 3H), 3.80 (s, 3H), 1.95-1.91 (m, 2H), 1.72-1.67 (m, 2H), 1.54-1.46 (m, 3H), 1.41-1.27 (m, 3H);  $^{13}\text{C}$  NMR (100 MHz,  $\text{CDCl}_3$ )  $\delta$  163.6, 162.2, 137.0, 83.6, 53.2, 52.5, 31.2, 25.3, 23.3; HRMS (ESI)  $m/z$   $[\text{M}+\text{H}]^+$ : Calcd for  $\text{C}_{12}\text{H}_{18}\text{N}_3\text{O}_5$ : 284.1246. Found: 284.1243.

### (*E*)-dimethyl 2-diazo-3-(isopropoxyimino)succinate (1b):

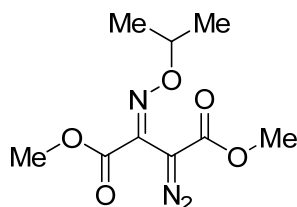

The title compound was prepared according to the general procedure. The product was obtained as yellow oil. Yield: 72%.  $^1\text{H}$  NMR (400 MHz,  $\text{CDCl}_3$ )  $\delta$  4.56-4.50 (m, 1H), 3.88 (s, 3H), 3.80 (s, 3H), 1.29 (d,  $J$  = 6.4 Hz, 6H);  $^{13}\text{C}$  NMR (100 MHz,  $\text{CDCl}_3$ )  $\delta$  163.7, 162.3,

137.1, 78.8, 53.3, 52.6, 21.5; HRMS (ESI)  $m/z$   $[M+H]^+$ : Calcd for  $C_9H_{14}N_3O_5$ : 244.0933. Found: 244.0931.

**(E)- dimethyl 2-(benzyloxyimino)-3-diazosuccinate (1c):**

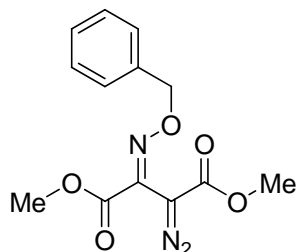

The title compound was prepared according to the general procedure. The product was obtained as yellow solid. mp: 91-93 °C. Yield: 80%.  $^1H$  NMR (400 MHz,  $CDCl_3$ )  $\delta$  7.39-7.32 (m, 5H), 5.26 (s, 2H), 3.88 (s, 3H), 3.78 (s, 3H);  $^{13}C$  NMR (100 MHz,  $CDCl_3$ )  $\delta$  163.3, 162.0, 138.3, 135.7, 128.6, 128.6, 128.4, 76.7, 53.4, 52.6; HRMS (ESI)  $m/z$   $[M+H]^+$ : Calcd for  $C_{13}H_{14}N_3O_5$ : 292.0933. Found: 292.0926.

**(E)- dimethyl 2-(4-chlorobenzyloxyimino)-3-diazosuccinate (1d):**

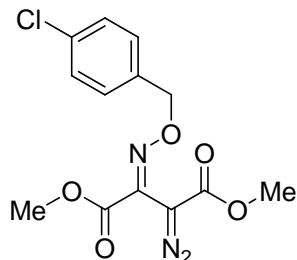

The title compound was prepared according to the general procedure. The product was obtained as yellow oil. Yield: 86%.  $^1H$  NMR (400 MHz,  $CDCl_3$ )  $\delta$  7.35 (d,  $J$  = 8.4 Hz, 2H), 7.27 (d,  $J$  = 8.4 Hz, 2H), 5.21 (s, 2H), 3.88 (s, 3H), 3.78 (s, 3H);  $^{13}C$  NMR (100 MHz,  $CDCl_3$ )  $\delta$  163.2, 161.8, 138.6, 134.5, 134.2, 129.8, 128.8, 76.7, 53.4, 52.6; HRMS (ESI)  $m/z$   $[M+H]^+$ : Calcd for  $C_{13}H_{13}ClN_3O_5$ : 326.0544. Found: 326.0542.

**(E)- dimethyl 2-diazo-3-(4-methoxybenzyloxyimino)succinate (1e):**

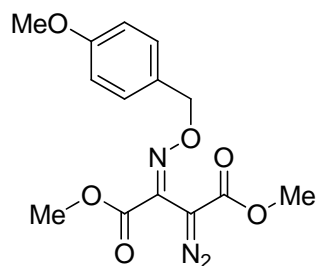

The title compound was prepared according to the general procedure. The product was obtained as yellow solid. mp: 85-87 °C. Yield: 82%.  $^1\text{H}$  NMR (400 MHz,  $\text{CDCl}_3$ )  $\delta$  7.27 (d,  $J$  = 8.8 Hz, 2H), 6.89 (d,  $J$  = 8.8 Hz, 2H), 5.19 (s, 2H), 3.88 (s, 3H), 3.82 (s, 3H), 3.77 (s, 3H);  $^{13}\text{C}$  NMR (100 MHz,  $\text{CDCl}_3$ )  $\delta$  163.3, 162.0, 159.9, 138.0, 130.2, 127.8, 113.9, 78.1, 55.3, 53.3, 52.5; HRMS (ESI)  $m/z$   $[\text{M}+\text{H}]^+$ : Calcd for  $\text{C}_{14}\text{H}_{16}\text{N}_3\text{O}_6$ : 322.1039. Found: 322.1035.

**(E)- dimethyl 2-diazo-3-(4-nitrobenzyloxyimino)succinate (1f):**

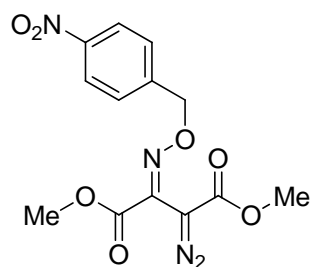

The title compound was prepared according to the general procedure. The product was obtained as yellow oil. Yield: 62%.  $^1\text{H}$  NMR (400 MHz,  $\text{CDCl}_3$ )  $\delta$  8.24 (d,  $J$  = 8.8 Hz, 2H), 7.49 (d,  $J$  = 8.8 Hz, 2H), 5.35 (s, 2H), 3.88 (s, 3H), 3.81 (s, 3H);  $^{13}\text{C}$  NMR (100 MHz,  $\text{CDCl}_3$ )  $\delta$  162.9, 161.6, 148.0, 143.1, 139.4, 128.6, 123.9, 76.6, 53.5, 52.7; HRMS (ESI)  $m/z$   $[\text{M}+\text{H}]^+$ : Calcd for  $\text{C}_{13}\text{H}_{13}\text{N}_4\text{O}_7$ : 337.0784. Found: 337.0775.

**(E)-dimethyl 2-diazo-3-(1-phenylethoxyimino)succinate (1g):**

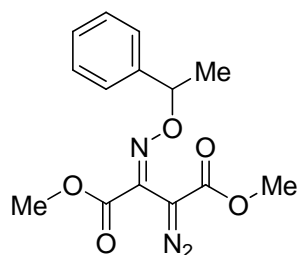

The title compound was prepared according to the general procedure. The product was obtained as yellow oil. Yield: 77%.  $^1\text{H}$  NMR (400 MHz,  $\text{CDCl}_3$ )  $\delta$  7.38-7.28 (m, 5H), 5.40

(q,  $J = 6.8$  Hz, 1H), 3.85 (s, 3H), 3.79 (s, 3H), 1.61 (d,  $J = 6.4$  Hz, 3H);  $^{13}\text{C}$  NMR (100 MHz,  $\text{CDCl}_3$ )  $\delta$  163.4, 162.0, 141.1, 137.7, 128.5, 128.1, 126.2, 84.1, 53.3, 52.5, 21.6; HRMS (ESI)  $m/z$   $[\text{M}+\text{H}]^+$ : Calcd for  $\text{C}_{14}\text{H}_{16}\text{N}_3\text{O}_5$ : 306.1090. Found: 306.1093.

**(Z)- benzyl 2-diazo-3-(isopropoxyimino)butanoate (1h):**

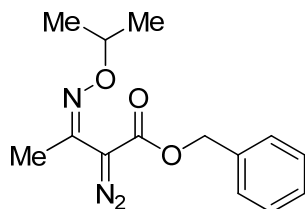

The title compound was prepared according to the general procedure. The product was obtained as yellow oil. Yield: 71%.  $^1\text{H}$  NMR (400 MHz,  $\text{CDCl}_3$ )  $\delta$  7.40-7.31 (m, 5H), 5.22 (s, 2H), 4.31-4.24 (m, 1H), 2.16 (s, 3H), 1.21 (d,  $J = 6.0$  Hz, 6H);  $^{13}\text{C}$  NMR (100 MHz,  $\text{CDCl}_3$ )  $\delta$  164.0, 140.2, 135.6, 128.6, 128.4, 128.1, 75.9, 66.6, 21.4, 19.3; HRMS (ESI)  $m/z$   $[\text{M}+\text{H}]^+$ : Calcd for  $\text{C}_{14}\text{H}_{18}\text{N}_3\text{O}_3$ : 276.1348. Found: 276.1351.

**(Z)- methyl 2-diazo-3-(isopropoxyimino)-4-phenylbutanoate (1i):**

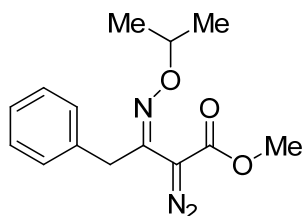

The title compound was prepared according to the general procedure. The product was obtained as yellow oil. Yield: 66%.  $^1\text{H}$  NMR (400 MHz,  $\text{CDCl}_3$ )  $\delta$  7.31-7.20 (m, 5H), 4.42-4.35 (m, 1H), 3.93 (s, 2H), 3.73 (s, 3H), 1.27 (d,  $J = 6.4$  Hz, 6H);  $^{13}\text{C}$  NMR (100 MHz,  $\text{CDCl}_3$ )  $\delta$  164.2, 142.8, 137.7, 128.8, 128.4, 126.6, 76.2, 51.9, 37.7, 21.4; HRMS (ESI)  $m/z$   $[\text{M}+\text{H}]^+$ : Calcd for  $\text{C}_{14}\text{H}_{18}\text{N}_3\text{O}_3$ : 276.1348. Found: 276.1349.

**(Z)-tert-butyl 2-diazo-3-(isopropoxyimino)-4-phenylbutanoate (1j):**

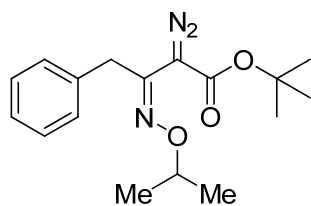

The title compound was prepared according to the general procedure. The product was obtained as yellow oil. Yield: 62%.  $^1\text{H}$  NMR (400 MHz,  $\text{CDCl}_3$ )  $\delta$  7.33-7.24 (m, 5H), 4.42-4.39 (m, 1H), 3.94 (s, 2H), 1.47 (s, 9H), 1.29 (d,  $J$  = 6.0 Hz, 6H);  $^{13}\text{C}$  NMR (100 MHz,  $\text{CDCl}_3$ )  $\delta$  163.1, 143.7, 137.8, 128.9, 128.3, 126.5, 82.1, 76.1, 37.6, 28.2, 21.4; HRMS (ESI)  $m/z$   $[\text{M}+\text{H}]^+$ : Calcd for  $\text{C}_{17}\text{H}_{24}\text{N}_3\text{O}_3$ : 318.1818. Found: 318.1812.

**(Z)-methyl 2-diazo-3-(isopropoxyimino)-4-(4-methoxyphenyl)butanoate (1k):**

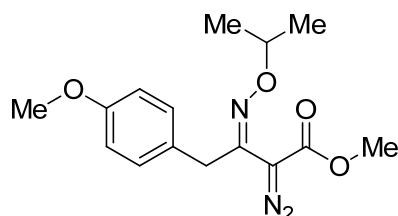

The title compound was prepared according to the general procedure. The product was obtained as yellow oil. Yield: 64%.  $^1\text{H}$  NMR (400 MHz,  $\text{CDCl}_3$ )  $\delta$  7.16 (d,  $J$  = 8.8 Hz, 2H), 6.83 (d,  $J$  = 8.8 Hz, 2H), 4.41-4.35 (m, 1H), 3.86 (s, 2H), 3.79 (s, 3H), 3.73 (s, 3H), 1.26 (d,  $J$  = 6.4 Hz, 6H);  $^{13}\text{C}$  NMR (100 MHz,  $\text{CDCl}_3$ )  $\delta$  164.2, 158.4, 143.2, 129.8, 129.6, 113.8, 76.1, 55.2, 51.9, 36.8, 21.4; HRMS (ESI)  $m/z$   $[\text{M}+\text{H}]^+$ : Calcd for  $\text{C}_{15}\text{H}_{20}\text{N}_3\text{O}_4$ : 306.1454. Found: 306.1458.

**(Z)-methyl 4-(4-chlorophenyl)-2-diazo-3-(isopropoxyimino)butanoate (1l):**

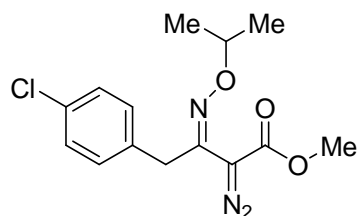

The title compound was prepared according to the general procedure. The product was obtained as yellow oil. Yield: 78%.  $^1\text{H}$  NMR (300 MHz,  $\text{CDCl}_3$ )  $\delta$  7.25 (d,  $J$  = 8.4 Hz, 2H),

7.18 (d,  $J = 8.4$  Hz, 2H), 4.41-4.33 (m, 1H), 3.89 (s, 2H), 3.72 (s, 3H), 1.26 (d,  $J = 6.3$  Hz, 6H);  $^{13}\text{C}$  NMR (75 MHz,  $\text{CDCl}_3$ )  $\delta$  164.0, 162.3, 142.4, 136.2, 132.4, 130.2, 128.5, 76.3, 52.0, 37.1, 21.4; HRMS (ESI)  $m/z$   $[\text{M}+\text{H}]^+$ : Calcd for  $\text{C}_{14}\text{H}_{17}\text{ClN}_3\text{O}_3$ : 310.0958. Found: 310.0953.

**(Z)-methyl 4-(3-chlorophenyl)-2-diazo-3-(isopropoxyimino)butanoate (1m):**

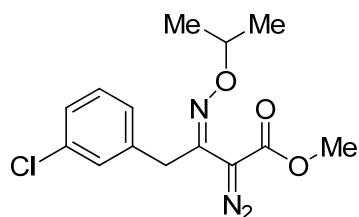

The title compound was prepared according to the general procedure. The product was obtained as yellow oil. Yield: 83%.  $^1\text{H}$  NMR (400 MHz,  $\text{CDCl}_3$ )  $\delta$  7.24-7.13 (m, 4H), 4.41-4.35 (m, 1H), 3.90 (s, 2H), 3.74 (s, 3H), 1.26 (d,  $J = 6.4$  Hz, 6H);  $^{13}\text{C}$  NMR (100 MHz,  $\text{CDCl}_3$ )  $\delta$  164.0, 142.1, 139.8, 134.2, 129.6, 129.0, 127.1, 126.9, 76.4, 52.0, 37.4, 21.4; HRMS (ESI)  $m/z$   $[\text{M}+\text{H}]^+$ : Calcd for  $\text{C}_{14}\text{H}_{17}\text{ClN}_3\text{O}_3$ : 310.0958. Found: 310.0957.

**(Z)-methyl 2-diazo-3-(isopropoxyimino)-5-phenylpentanoate (1n):**

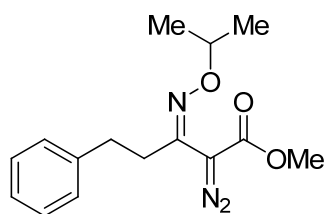

The title compound was prepared according to the general procedure. The product was obtained as yellow oil. Yield: 64%.  $^1\text{H}$  NMR (400 MHz,  $\text{CDCl}_3$ )  $\delta$  7.23-7.15 (m, 5H), 4.31-4.25 (m, 1H), 3.79 (s, 3H), 2.92-2.81 (m, 4H), 1.18 (d,  $J = 6.4$  Hz, 6H);  $^{13}\text{C}$  NMR (100 MHz,  $\text{CDCl}_3$ )  $\delta$  164.4, 143.0, 141.1, 128.6, 128.4, 126.0, 76.1, 52.1, 34.2, 34.0, 21.4; HRMS (ESI)  $m/z$   $[\text{M}+\text{H}]^+$ : Calcd for  $\text{C}_{15}\text{H}_{20}\text{N}_3\text{O}_3$ : 290.1505. Found: 290.1504.

**General procedure for 2-isoxazoles and 1-azirines:** To a stirred suspension of  $\text{Rh}_2(\text{Piv})_4$  (2 mol%) in dichloroethane was added a solution of  $\alpha$ -diazo oximine ethers in dichloroethane under nitrogen, and the reaction mixture was stirred under reflux (for 2-isoxazoles) or at RT (for 1-azirines) until the diazo compound was completely consumed (detected by TLC). The solvent was evaporated under reduced pressure to give crude compound which was purified by flash column chromatography (silica gel, toluene: ethyl acetate = 50:1) to give desired products.

**Dimethyl 1-oxa-2-azaspiro[4.5]dec-2-ene-3,4-dicarboxylate (2a):**

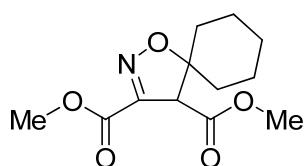

The title compound was prepared according to the general procedure. The product was obtained as white solid. mp: 96-98 °C. Yield 60%;  $^1\text{H}$  NMR (400 MHz,  $\text{CDCl}_3$ )  $\delta$  3.88 (s, 4H), 3.75 (s, 3H), 1.92-1.83 (m, 2H), 1.77-1.67 (m, 2H), 1.64-1.57 (m, 5H), 1.38-1.31 (m, 1H);  $^{13}\text{C}$  NMR (100 MHz,  $\text{CDCl}_3$ )  $\delta$  167.7, 160.9, 149.3, 92.5, 60.3, 52.8, 52.6, 37.4, 31.4, 24.5, 22.3, 22.2; HRMS (ESI)  $m/z$   $[\text{M}+\text{H}]^+$ : Calcd for  $\text{C}_{12}\text{H}_{18}\text{NO}_5$ : 256.1185. Found: 256.1185.

**Dimethyl 5, 5-dimethyl-4,5-dihydroisoxazole-3,4-dicarboxylate (2b):**

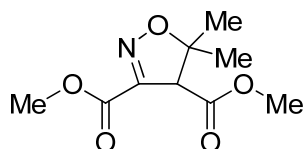

The title compound was prepared according to the general procedure. The product was obtained as colorless oil. Yield 46%;  $^1\text{H}$  NMR (400 MHz,  $\text{CDCl}_3$ ) 3.96 (s, 1H), 3.90 (s, 3H), 3.77 (s, 3H), 1.53 (s, 3H), 1.43 (s, 3H);  $^{13}\text{C}$  NMR (100 MHz,  $\text{CDCl}_3$ )  $\delta$  167.9, 160.9, 149.2, 91.0, 60.6, 53.0, 52.8, 28.7, 22.6; HRMS (ESI)  $m/z$   $[\text{M}+\text{H}]^+$ : Calcd for  $\text{C}_9\text{H}_{14}\text{NO}_5$ : 216.0872. Found: 216.0878.

**cis-Dimethyl 5-phenyl-4,5-dihydroisoxazole-3,4-dicarboxylate (2c):**

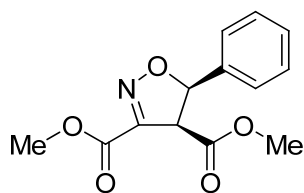

The product was obtained as white solid. mp: 83-84 °C.  $^1\text{H}$  NMR (400 MHz,  $\text{CDCl}_3$ )  $\delta$  7.37-7.26 (m, 5H), 6.02 (d,  $J = 12.4$  Hz, 1H), 4.60 (d,  $J = 12.4$  Hz, 1H), 3.92 (s, 3H), 3.24 (s, 3H);  $^{13}\text{C}$  NMR (100 MHz,  $\text{CDCl}_3$ )  $\delta$  166.7, 160.3, 149.5, 134.0, 129.1, 128.4, 126.7, 87.6, 57.3, 53.0, 52.2; HRMS (ESI)  $m/z$   $[\text{M}+\text{H}]^+$ : Calcd for  $\text{C}_{13}\text{H}_{14}\text{NO}_5$ : 264.0872. Found: 264.0859.

***trans*-Dimethyl 5-phenyl-4,5-dihydroisoxazole-3,4-dicarboxylate (2c'):**

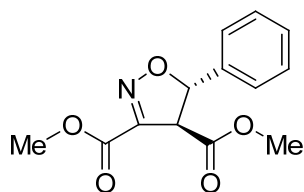

The product was obtained as white solid. mp: 79-81 °C.  $^1\text{H}$  NMR (400 MHz,  $\text{CDCl}_3$ )  $\delta$  7.41-7.32 (m, 5H), 5.93 (d,  $J = 8.0$  Hz, 1H), 4.33 (d,  $J = 7.6$  Hz, 1H), 3.91 (s, 3H), 3.83 (s, 3H);  $^{13}\text{C}$  NMR (100 MHz,  $\text{CDCl}_3$ )  $\delta$  168.9, 160.2, 148.7, 137.8, 129.2, 129.1, 125.5, 89.0, 59.7, 53.3, 53.1; HRMS (ESI)  $m/z$   $[\text{M}+\text{H}]^+$ : Calcd for  $\text{C}_{13}\text{H}_{14}\text{NO}_5$ : 264.0872. Found: 264.0859.

The title compounds (**2c** and **2c'**) were prepared according to the general procedure. Yield: 65%;

***cis*-Dimethyl 5-(4-chlorophenyl)-4,5-dihydroisoxazole-3,4-dicarboxylate (2d):**

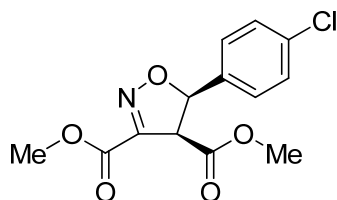

The product was obtained as white solid. mp: 120-122 °C.  $^1\text{H}$  NMR (400 MHz,  $\text{CDCl}_3$ )  $\delta$  7.35 (d,  $J = 8.8$  Hz, 2H), 7.25 (d,  $J = 8.4$  Hz, 2H), 5.99 (d,  $J = 12.4$  Hz, 1H), 4.60 (d,  $J = 12.4$

Hz, 1H), 3.92 (s, 3H), 3.30 (s, 3H);  $^{13}\text{C}$  NMR (100 MHz,  $\text{CDCl}_3$ )  $\delta$  166.5, 160.1, 149.6, 135.1, 132.6, 128.7, 128.1, 86.8, 57.3, 53.1, 52.4; HRMS (ESI)  $m/z$   $[\text{M}+\text{H}]^+$ : Calcd for  $\text{C}_{13}\text{H}_{13}\text{ClNO}_5$ : 298.0482. Found: 298.0483.

***trans*-Dimethyl 5-(4-chlorophenyl)-4,5-dihydroisoxazole-3,4-dicarboxylate (2d')**

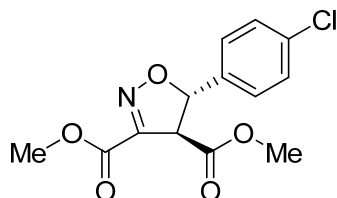

The product was obtained as colorless oil.  $^1\text{H}$  NMR (400 MHz,  $\text{CDCl}_3$ )  $\delta$  7.38 (d,  $J$  = 8.8 Hz, 2H), 7.27 (d,  $J$  = 8.4 Hz, 2H), 5.90 (d,  $J$  = 8.0 Hz, 1H), 4.28 (d,  $J$  = 8.0 Hz, 1H), 3.92 (s, 3H), 3.84 (s, 3H);  $^{13}\text{C}$  NMR (100 MHz,  $\text{CDCl}_3$ )  $\delta$  168.6, 160.1, 148.7, 136.3, 135.2, 129.3, 126.9, 88.1, 59.8, 53.4, 53.1; HRMS (ESI)  $m/z$   $[\text{M}+\text{H}]^+$ : Calcd for  $\text{C}_{13}\text{H}_{13}\text{ClNO}_5$ : 298.0482. Found: 298.0483.

The title compounds (**2d** and **2d'**) were prepared according to the general procedure. Yield 63%;

***cis*-Dimethyl 5-(4-methoxyphenyl)-4,5-dihydroisoxazole-3,4-dicarboxylate (2e)**

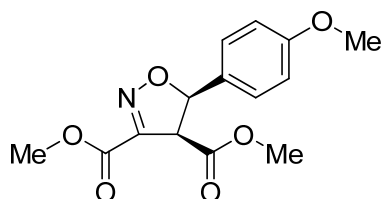

The product was obtained as white solid. mp: 98-100 °C.  $^1\text{H}$  NMR (400 MHz,  $\text{CDCl}_3$ )  $\delta$  7.22 (d,  $J$  = 8.8 Hz, 2H), 6.88 (d,  $J$  = 8.8 Hz, 2H), 5.98 (d,  $J$  = 12.4 Hz, 1H), 4.55 (d,  $J$  = 12.0 Hz, 1H), 3.92 (s, 3H), 3.80 (s, 3H), 3.30 (s, 3H);  $^{13}\text{C}$  NMR (100 MHz,  $\text{CDCl}_3$ )  $\delta$  166.9, 160.4, 160.2, 149.6, 128.2, 125.9, 113.8, 87.6, 57.1, 55.3, 53.0, 52.3; HRMS (ESI)  $m/z$   $[\text{M}+\text{H}]^+$ : Calcd for  $\text{C}_{14}\text{H}_{15}\text{NO}_6$ : 294.0978. Found: 294.0978.

***trans*-Dimethyl 5-(4-methoxyphenyl)-4,5-dihydroisoxazole-3,4-dicarboxylate (2e')**

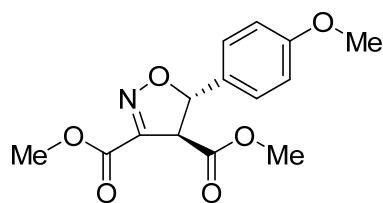

The product was obtained as white solid. mp: 64-66 °C.  $^1\text{H}$  NMR (400 MHz,  $\text{CDCl}_3$ )  $\delta$  7.25 (d,  $J$  = 9.2 Hz, 2H), 6.92 (d,  $J$  = 8.8 Hz, 2H), 5.86 (d,  $J$  = 8.4 Hz, 1H), 4.32 (d,  $J$  = 8.4 Hz, 1H), 3.91 (s, 3H), 3.82 (s, 6H);  $^{13}\text{C}$  NMR (100 MHz,  $\text{CDCl}_3$ )  $\delta$  169.0, 160.3, 160.3, 148.7, 129.6, 127.2, 114.5, 89.2, 59.5, 55.4, 53.2, 53.0; HRMS (ESI)  $m/z$   $[\text{M}+\text{H}]^+$ : Calcd for  $\text{C}_{14}\text{H}_{16}\text{NO}_6$ : 294.0978. Found: 294.0978.

The title compounds (**2e** and **2e'**) were prepared according to the general procedure. Yield 50%;

***cis*-Dimethyl 5-(4-nitrophenyl)-4,5-dihydroisoxazole-3,4-dicarboxylate (2f):**

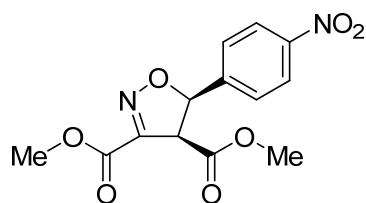

The product was obtained as white solid. mp: 141-142 °C.  $^1\text{H}$  NMR (400 MHz,  $\text{CDCl}_3$ )  $\delta$  8.24 (d,  $J$  = 8.8 Hz, 2H), 7.52 (d,  $J$  = 8.8 Hz, 2H), 6.11 (d,  $J$  = 12.4 Hz, 1H), 4.71 (d,  $J$  = 12.4 Hz, 1H), 3.93 (s, 3H), 3.29 (s, 3H);  $^{13}\text{C}$  NMR (100 MHz,  $\text{CDCl}_3$ )  $\delta$  166.1, 159.9, 149.6, 148.3, 141.2, 127.7, 123.6, 86.0, 57.5, 53.3, 52.6; HRMS (ESI)  $m/z$   $[\text{M}+\text{H}]^+$ : Calcd for  $\text{C}_{13}\text{H}_{13}\text{N}_2\text{O}_7$ : 309.0723. Found: 309.0731.

***trans*-Dimethyl 5-(4-nitrophenyl)-4,5-dihydroisoxazole-3,4-dicarboxylate (2f'):**

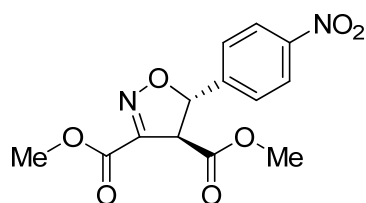

The product was obtained as white solid. mp: 111-113 °C.  $^1\text{H}$  NMR (400 MHz,  $\text{CDCl}_3$ )  $\delta$  8.28 (d,  $J$  = 8.8 Hz, 2H), 7.54 (d,  $J$  = 8.8 Hz, 2H), 6.04 (d,  $J$  = 7.2 Hz, 1H), 4.30 (d,  $J$  = 7.2

Hz, 1H), 3.93 (s, 3H), 3.87 (s, 3H);  $^{13}\text{C}$  NMR (100 MHz,  $\text{CDCl}_3$ )  $\delta$  168.1, 159.8, 148.7, 148.3, 144.8, 126.3, 124.4, 87.1, 59.9, 53.6, 53.3; HRMS (ESI)  $m/z$   $[\text{M}+\text{H}]^+$ : Calcd for  $\text{C}_{13}\text{H}_{13}\text{N}_2\text{O}_7$ : 309.0723. Found: 309.0731.

The title compounds (**2f** and **2f'**) were prepared according to the general procedure. Yield 73%;

***cis*-Dimethyl 5-methyl-5-phenyl-4,5-dihydroisoxazole-3,4-dicarboxylate (2g):**

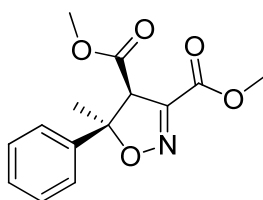

The product was obtained as white solid. mp: 108-110 °C.  $^1\text{H}$  NMR (400 MHz,  $\text{CDCl}_3$ )  $\delta$  7.39-7.28 (m, 5H), 4.22 (s, 1H), 3.90 (s, 3H), 3.17 (s, 3H), 1.89 (s, 3H);  $^{13}\text{C}$  NMR (100 MHz,  $\text{CDCl}_3$ )  $\delta$  166.9, 160.5, 148.9, 138.4, 128.3, 128.2, 125.6, 94.3, 63.2, 53.0, 52.2, 28.1; HRMS (ESI)  $m/z$   $[\text{M}+\text{H}]^+$ : Calcd for  $\text{C}_{14}\text{H}_{16}\text{NO}_5$ : 278.1028. Found: 278.1026.

***trans*-Dimethyl 5-methyl-5-phenyl-4,5-dihydroisoxazole-3,4-dicarboxylate (2g'):**

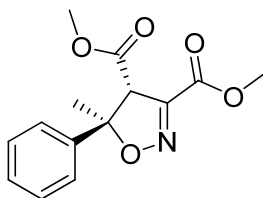

The product was obtained as white solid. mp: 74-75 °C.  $^1\text{H}$  NMR (400 MHz,  $\text{CDCl}_3$ )  $\delta$  7.47-7.45 (m, 2H), 7.41-7.37 (m, 2H), 7.33-7.30 (m, 1H), 4.39 (s, 1H), 3.86 (s, 3H), 3.85 (s, 3H), 1.72 (s, 3H);  $^{13}\text{C}$  NMR (100 MHz,  $\text{CDCl}_3$ )  $\delta$  167.6, 160.4, 149.3, 144.3, 128.8, 128.1, 124.0, 93.6, 62.3, 52.9, 52.9, 24.4; HRMS (ESI)  $m/z$   $[\text{M}+\text{H}]^+$ : Calcd for  $\text{C}_{14}\text{H}_{16}\text{NO}_5$ : 278.1028. Found: 278.1026.

The title compounds (**2g** and **2g'**) were prepared according to the general procedure. Yield 50%;

**Benzyl 3, 5, 5-trimethyl-4, 5-dihydroisoxazole-4-carboxylate (2h):**

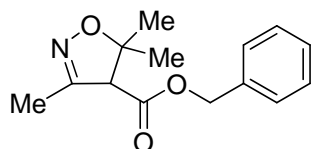

The title compound was prepared according to the general procedure. The product was obtained as colorless oil. Yield 20%;  $^1\text{H}$  NMR (400 MHz,  $\text{CDCl}_3$ )  $\delta$  7.41-7.33 (m, 5H), 5.22 (d,  $J = 12.4$  Hz, 1H), 5.14 (d,  $J = 12.4$  Hz, 1H), 3.66 (s, 1H), 2.01 (s, 3H), 1.47 (s, 3H), 1.23 (s, 3H);  $^{13}\text{C}$  NMR (10MHz,  $\text{CDCl}_3$ )  $\delta$  167.9, 153.1, 135.0, 128.7, 128.6, 86.3, 67.3, 64.7, 28.3, 22.5, 13.1; HRMS (ESI)  $m/z$   $[\text{M}+\text{H}]^+$ : Calcd for  $\text{C}_{14}\text{H}_{18}\text{NO}_3$ : 248.1287. Found: 248.1292.

### Benzyl 3-methyl-2H-azirine-2-carboxylate (3h):

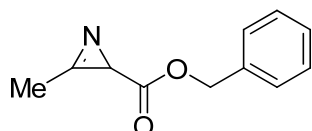

The title compound was prepared according to the general procedure. The product was obtained as colorless oil. Yield 60%;  $^1\text{H}$  NMR (400 MHz,  $\text{CDCl}_3$ )  $\delta$  7.39-7.32 (m, 5H), 5.19 (d,  $J = 12.4$  Hz, 1H), 5.14 (d,  $J = 12.4$  Hz, 1H), 2.52 (s, 3H), 2.49 (s, 1H);  $^{13}\text{C}$  NMR (100 MHz,  $\text{CDCl}_3$ )  $\delta$  171.9, 159.0, 135.5, 128.6, 128.3, 128.2, 66.8, 28.8, 12.6; HRMS (ESI)  $m/z$   $[\text{M}+\text{H}]^+$ : Calcd for  $\text{C}_{11}\text{H}_{12}\text{NO}_2$ : 190.0868. Found: 190.0872.

### Methyl 3-benzyl-5,5-dimethyl-4,5-dihydroisoxazole-4-carboxylate (2i):

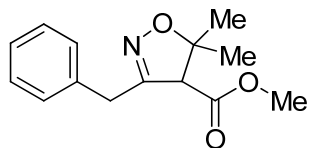

The title compound was prepared according to the general procedure. The product was obtained as colorless oil. Yield 16%;  $^1\text{H}$  NMR (400 MHz,  $\text{CDCl}_3$ )  $\delta$  7.34-7.30 (m, 2H), 7.27-7.24 (m, 1H), 7.21-7.19 (m, 2H), 3.92 (d,  $J = 14.8$  Hz, 1H), 3.67 (s, 3H), 3.60 (d,  $J = 15.2$  Hz, 1H), 3.42 (s, 1H), 1.38 (s, 3H), 1.31 (s, 3H);  $^{13}\text{C}$  NMR (100 MHz,  $\text{CDCl}_3$ )  $\delta$  168.5, 155.9, 135.4, 129.0, 128.9, 127.2, 86.5, 62.4, 52.2, 33.9, 28.1, 22.4; HRMS (ESI)  $m/z$   $[\text{M}+\text{H}]^+$ : Calcd for  $\text{C}_{14}\text{H}_{18}\text{NO}_3$ : 248.1287. Found: 248.1288.

**Methyl 3-benzyl-2H-azirine-2-carboxylate (3i):**

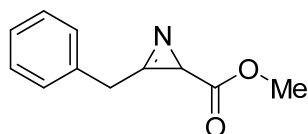

The title compound was prepared according to the general procedure. The product was obtained as colorless oil. Yield 63%;  $^1\text{H}$  NMR (400 MHz,  $\text{CDCl}_3$ )  $\delta$  7.39-7.29 (m, 5H), 4.22 (d,  $J$  = 17.6 Hz, 1H), 4.14 (d,  $J$  = 17.6 Hz, 1H), 3.68 (s, 3H), 2.53 (s, 1H);  $^{13}\text{C}$  NMR (100 MHz,  $\text{CDCl}_3$ )  $\delta$  172.2, 161.4, 131.5, 129.0, 129.0, 127.8, 52.2, 33.1, 29.1; HRMS (ESI)  $m/z$   $[\text{M}+\text{H}]^+$ : Calcd for  $\text{C}_{11}\text{H}_{12}\text{NO}_2$ : 190.0868. Found: 190.0870.

***tert*-Butyl 3-benzyl-5,5-dimethyl-4,5-dihydroisoxazole-4-carboxylate (2j):**

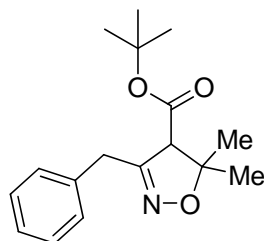

The title compound was prepared according to the general procedure. The product was obtained as colorless oil. Yield 16%;  $^1\text{H}$  NMR (400 MHz,  $\text{CDCl}_3$ )  $\delta$  7.34-7.27 (m, 3H), 7.21-7.19 (m, 2H), 3.94 (d,  $J$  = 15.2 Hz, 1H), 3.60 (d,  $J$  = 15.2 Hz, 1H), 3.31 (s, 1H), 1.46 (s, 9H), 1.38 (s, 3H), 1.35 (s, 3H);  $^{13}\text{C}$  NMR (100 MHz,  $\text{CDCl}_3$ )  $\delta$  167.2, 156.5, 135.6, 129.0, 128.9, 127.1, 86.3, 82.4, 63.1, 33.8, 28.1, 27.9, 22.4; HRMS (ESI)  $m/z$   $[\text{M}+\text{H}]^+$ : Calcd for  $\text{C}_{17}\text{H}_{24}\text{NO}_3$ : 290.1756. Found: 290.1757.

***tert*-Butyl 3-benzyl-2H-azirine-2-carboxylate (3j):**

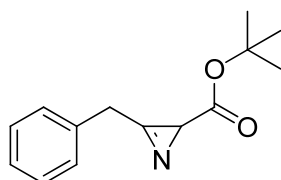

The title compound was prepared according to the general procedure. The product was obtained as colorless oil. Yield 56%;  $^1\text{H}$  NMR (400 MHz,  $\text{CDCl}_3$ )  $\delta$  7.37-7.29 (m, 5H), 4.15

(s, 2H), 2.42 (s, 1H), 1.38 (s, 9H);  $^{13}\text{C}$  NMR (100 MHz,  $\text{CDCl}_3$ )  $\delta$  170.9, 161.8, 131.9, 129.1, 129.0, 127.7, 81.5, 33.2, 30.2, 28.0; HRMS (ESI)  $m/z$   $[\text{M}+\text{H}]^+$ : Calcd for  $\text{C}_{14}\text{H}_{18}\text{NO}_2$ : 232.1338. Found: 232.1342.

**Methyl 3-(4-methoxybenzyl)-5,5-dimethyl-4,5-dihydroisoxazole-4-carboxylate (2k):**

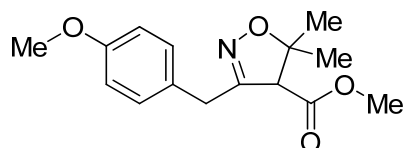

The title compound was prepared according to the general procedure. The product was obtained as colorless oil. Yield 23%;  $^1\text{H}$  NMR (400 MHz,  $\text{CDCl}_3$ )  $\delta$  7.11 (d,  $J = 8.4$  Hz, 2H), 6.85 (d,  $J = 8.4$  Hz, 2H), 3.86 (d,  $J = 14.8$  Hz, 1H), 3.79 (s, 3H), 3.68 (s, 3H), 3.54 (d,  $J = 15.2$  Hz, 1H), 3.43 (s, 1H), 1.38 (s, 3H), 1.31 (s, 3H);  $^{13}\text{C}$  NMR (100 MHz,  $\text{CDCl}_3$ )  $\delta$  168.5, 158.7, 156.3, 130.0, 127.2, 114.2, 86.4, 62.3, 55.2, 52.3, 32.9, 28.1, 22.4; HRMS (ESI)  $m/z$   $[\text{M}+\text{H}]^+$ : Calcd for  $\text{C}_{15}\text{H}_{20}\text{NO}_4$ : 278.1392. Found: 278.1390.

**Methyl 3-(4-methoxybenzyl)-2H-azirine-2-carboxylate (3k):**

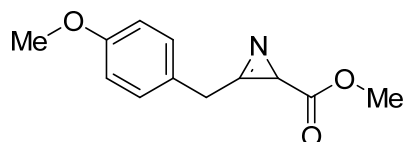

The title compound was prepared according to the general procedure. The product was obtained as colorless oil. Yield 61%;  $^1\text{H}$  NMR (400 MHz,  $\text{CDCl}_3$ )  $\delta$  7.21 (d,  $J = 8.8$  Hz, 2H), 6.89 (d,  $J = 8.8$  Hz, 2H), 4.15 (d,  $J = 17.2$  Hz, 1H), 4.07 (d,  $J = 17.2$  Hz, 1H), 3.80 (s, 3H), 3.69 (s, 3H), 2.51 (s, 1H);  $^{13}\text{C}$  NMR (100 MHz,  $\text{CDCl}_3$ )  $\delta$  172.2, 161.5, 159.1, 130.1, 123.3, 114.4, 55.3, 52.1, 32.2, 29.1; HRMS (ESI)  $m/z$   $[\text{M}+\text{H}]^+$ : Calcd for  $\text{C}_{12}\text{H}_{14}\text{NO}_3$ : 220.0974. Found: 220.0978.

**Methyl 3-(4-chlorobenzyl)-5,5-dimethyl-4,5-dihydroisoxazole-4-carboxylate (2l):**

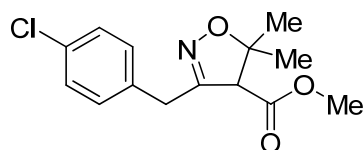

The title compound was prepared according to the general procedure. The product was obtained as white solid. mp: 40-41 °C. Yield 20%;  $^1\text{H}$  NMR (400 MHz,  $\text{CDCl}_3$ )  $\delta$  7.29 (d,  $J$  = 8.4 Hz, 2H), 7.14 (d,  $J$  = 8.4 Hz, 2H), 3.88 (d,  $J$  = 14.8 Hz, 1H), 3.69 (s, 3H), 3.59 (d,  $J$  = 15.2 Hz, 1H), 3.43 (s, 1H), 1.40 (s, 3H), 1.31 (s, 3H);  $^{13}\text{C}$  NMR (100 MHz,  $\text{CDCl}_3$ )  $\delta$  168.4, 155.4, 133.8, 133.1, 130.3, 129.0, 86.7, 62.3, 52.3, 33.2, 28.1, 22.4; HRMS (ESI)  $m/z$   $[\text{M}+\text{H}]^+$ : Calcd for  $\text{C}_{14}\text{H}_{17}\text{ClNO}_3$ : 282.0897. Found: 282.0899.

**Methyl 3-(4-chlorobenzyl)-2H-azirine-2-carboxylate (3l):**

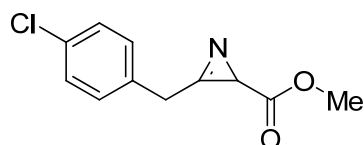

The title compound was prepared according to the general procedure. The product was obtained as colorless oil. Yield 53%;  $^1\text{H}$  NMR (400 MHz,  $\text{CDCl}_3$ )  $\delta$  7.35 (d,  $J$  = 8.4 Hz, 2H), 7.25 (d,  $J$  = 7.2 Hz, 2H), 4.18 (d,  $J$  = 17.6 Hz, 1H), 4.12 (d,  $J$  = 17.6 Hz, 1H), 3.70 (s, 3H), 2.54 (s, 1H);  $^{13}\text{C}$  NMR (100 MHz,  $\text{CDCl}_3$ )  $\delta$  172.0, 161.2, 133.9, 130.4, 130.0, 129.2, 52.2, 32.5, 29.2; HRMS (ESI)  $m/z$   $[\text{M}+\text{H}]^+$ : Calcd for  $\text{C}_{11}\text{H}_{11}\text{ClNO}_2$ : 224.0478. Found: 224.0479.

**Methyl 3-(3-chlorobenzyl)-5,5-dimethyl-4,5-dihydroisoxazole-4-carboxylate (2m):**

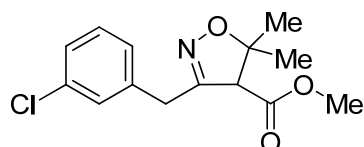

The title compound was prepared according to the general procedure. The product was obtained as colorless oil. Yield 21%;  $^1\text{H}$  NMR (400 MHz,  $\text{CDCl}_3$ )  $\delta$  7.33-7.21 (m, 3H), 7.10-7.08 (m, 1H), 3.88 (d,  $J$  = 15.2 Hz, 1H), 3.69 (s, 3H), 3.59 (d,  $J$  = 15.2 Hz, 1H), 3.45 (s, 1H), 1.41 (s, 3H), 1.31 (s, 3H);  $^{13}\text{C}$  NMR (100 MHz,  $\text{CDCl}_3$ )  $\delta$  168.4, 155.2, 137.3, 134.7, 130.1, 129.1, 127.5, 127.1, 86.8, 62.3, 52.3, 33.5, 28.1, 22.4; HRMS (ESI)  $m/z$   $[\text{M}+\text{H}]^+$ : Calcd for  $\text{C}_{14}\text{H}_{17}\text{ClNO}_3$ : 282.0897. Found: 282.0898.

**Methyl 3-(3-chlorobenzyl)-2H-azirine-2-carboxylate (3m):**

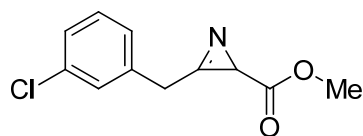

The title compound was prepared according to the general procedure. The product was obtained as colorless oil. Yield 51%;  $^1\text{H}$  NMR (400 MHz,  $\text{CDCl}_3$ )  $\delta$  7.31-7.30 (m, 3H), 7.22-7.20 (m, 1H), 4.19 (d,  $J = 17.2$  Hz, 1H), 4.12 (d,  $J = 18.0$  Hz, 1H), 3.70 (s, 3H), 2.55 (s, 1H);  $^{13}\text{C}$  NMR (100 MHz,  $\text{CDCl}_3$ )  $\delta$  172.0, 161.1, 134.8, 133.5, 130.2, 129.2, 128.1, 127.2, 52.3, 32.7, 29.3; HRMS (ESI)  $m/z$   $[\text{M}+\text{H}]^+$ : Calcd for  $\text{C}_{11}\text{H}_{11}\text{ClNO}_2$ : 224.0478. Found: 224.0476.

### Methyl 3-phenethyl-2H-azirine-2-carboxylate (3n):

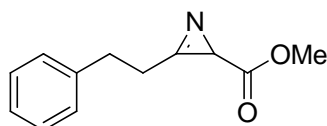

The title compound was prepared according to the general procedure. The product was obtained as colorless oil. Yield 62%;  $^1\text{H}$  NMR (400 MHz,  $\text{CDCl}_3$ )  $\delta$  7.34-7.22 (m, 5H), 3.70 (s, 3H), 3.17-3.07 (m, 4H), 2.44 (s, 1H);  $^{13}\text{C}$  NMR (100 MHz,  $\text{CDCl}_3$ )  $\delta$  172.4, 161.8, 139.2, 128.7, 128.3, 126.8, 52.2, 30.3, 29.0, 28.5; HRMS (ESI)  $m/z$   $[\text{M}+\text{H}]^+$ : Calcd for  $\text{C}_{12}\text{H}_{14}\text{NO}_2$ : 204.1025. Found: 204.1021.

### Methyl 5,5-dimethyl-3-phenethyl-4,5-dihydroisoxazole-4-carboxylate

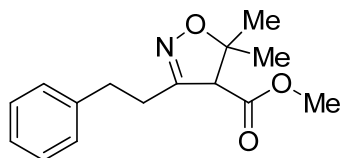

The title compound was prepared according to the general procedure. The product was obtained as colorless oil. Yield 23%;  $^1\text{H}$  NMR (400 MHz,  $\text{CDCl}_3$ )  $\delta$  7.31-7.28 (m, 2H), 7.22-7.20 (m, 3H), 3.72 (s, 3H), 3.55 (s, 1H), 2.95-2.88 (m, 2H), 2.86-2.80 (m, 1H), 2.62-2.55 (m, 1H), 1.40 (s, 3H), 1.30 (s, 3H);  $^{13}\text{C}$  NMR (100 MHz,  $\text{CDCl}_3$ )  $\delta$  168.6, 156.1,

140.5, 128.5, 128.3, 126.3, 86.1, 63.8, 52.3, 32.3, 29.2, 28.2, 22.4; HRMS (ESI)  $m/z$   
[M+H]<sup>+</sup>: Calcd for C<sub>15</sub>H<sub>20</sub>NO<sub>3</sub>: 262.1443. Found: 262.1448.

**General procedure for pyrroles:** To a mixture of  $\text{Rh}_2(\text{Piv})_4$  (2 mol%) and  $\text{Cu}(\text{acac})_2$  (0.6 equiv) was added a solution of  $\alpha$ -diazo  $\beta$ -oximino esters (1.0 equiv) in dichloroethane. The reaction mixture was stirred at RT for 2 h, and was gradually warmed to 50 °C until the azirine intermediate was fully consumed. The solvent was evaporated under reduced pressure to give crude compound which was purified by column chromatography using hexane: ethylacetate (50:2) to give pyrroles.

**Benzyl 4-acetyl-2,5-dimethyl-1H-pyrrole-3-carboxylate (4):**

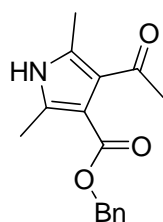

The title compound was prepared according to the general procedure. The product was obtained as colorless oil. Yield 50%;  $^1\text{H}$  NMR (400 MHz,  $\text{CDCl}_3$ )  $\delta$  9.07 (s, br, 1H), 7.43-7.33 (m, 5H), 5.32 (s, 2H), 2.61 (s, 3H), 2.50 (s, 3H), 2.44 (s, 3H);  $^{13}\text{C}$  NMR (100 MHz,  $\text{CDCl}_3$ )  $\delta$  195.5, 161.2, 138.4, 136.0, 130.0, 128.7, 128.4, 128.3, 123.7, 117.6, 66.1, 31.3, 15.2, 12.8; HRMS (ESI)  $m/z$   $[\text{M}+\text{H}]^+$ : Calcd for  $\text{C}_{16}\text{H}_{18}\text{NO}_3$ : 272.1287. Found: 272.1288.

NOESY spectra of **2g** and **2g'**

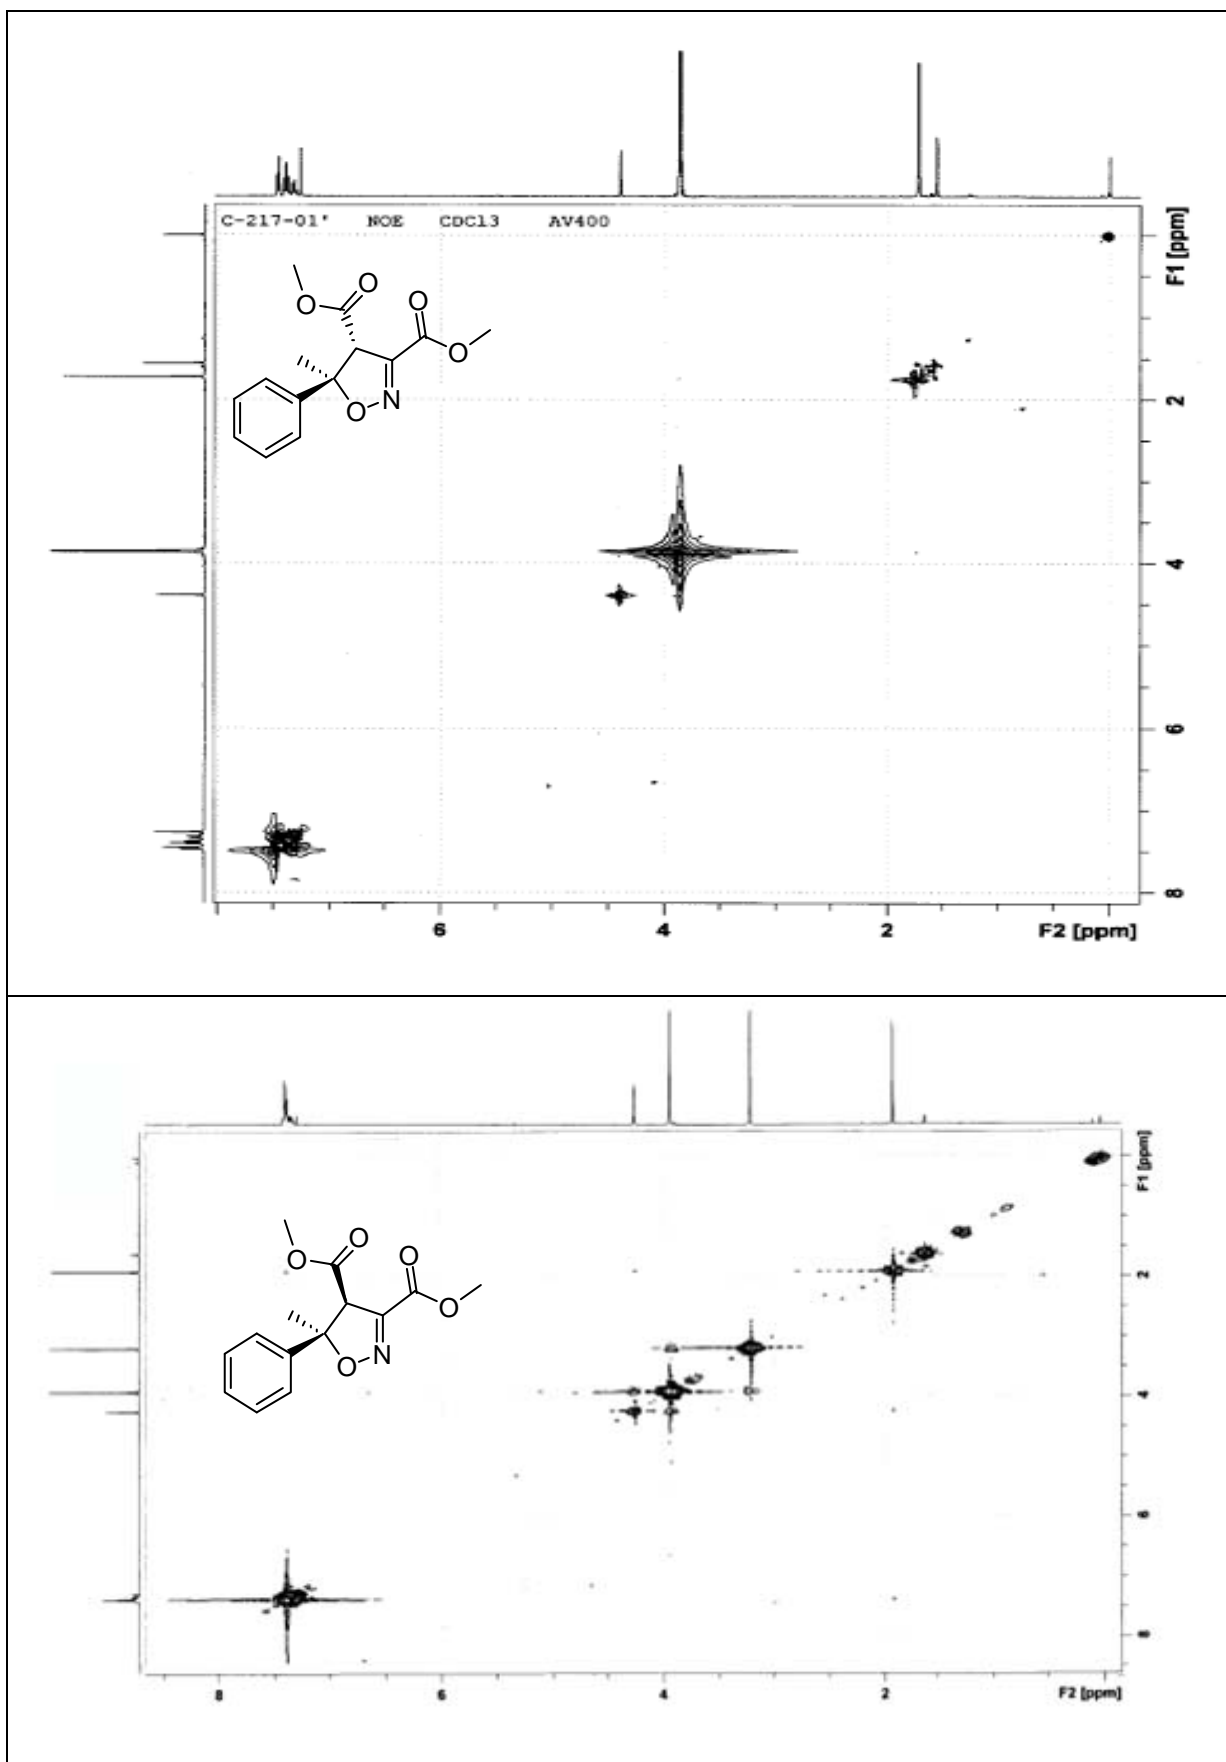

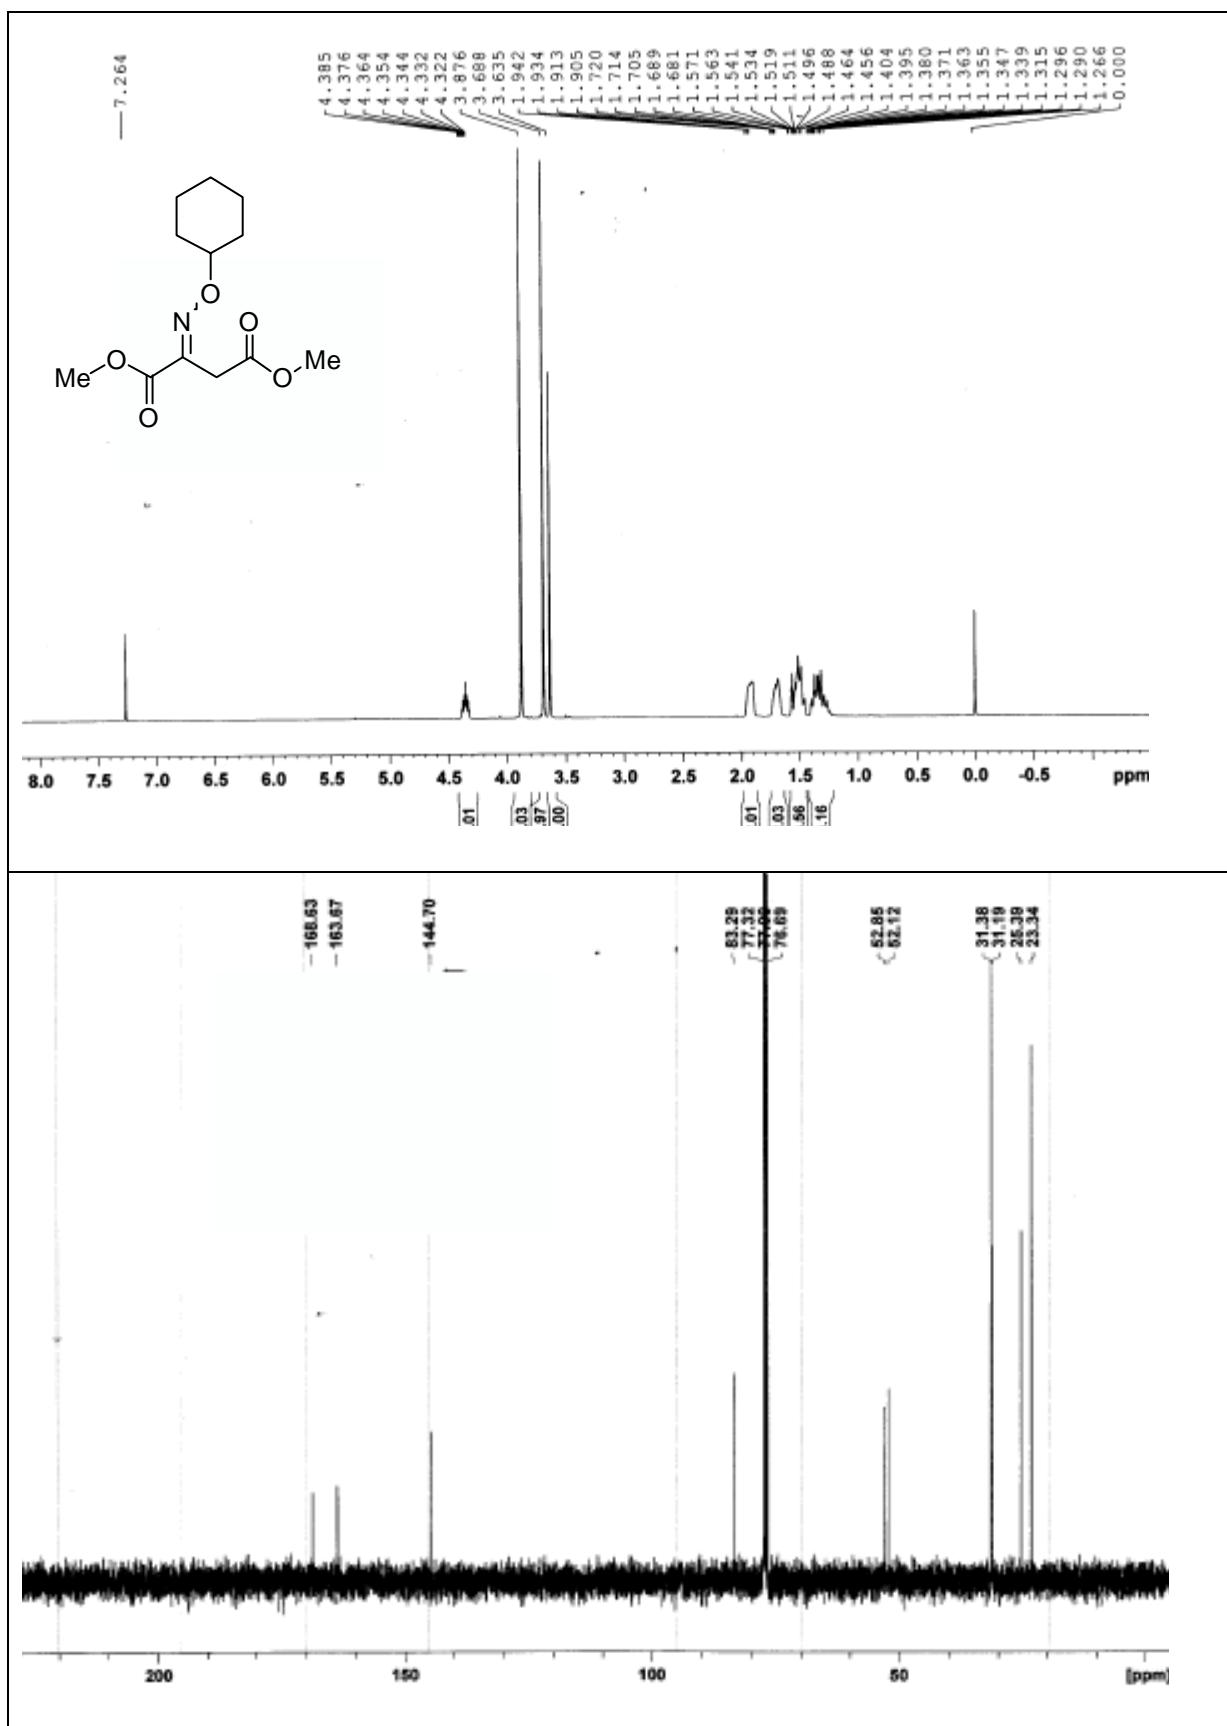

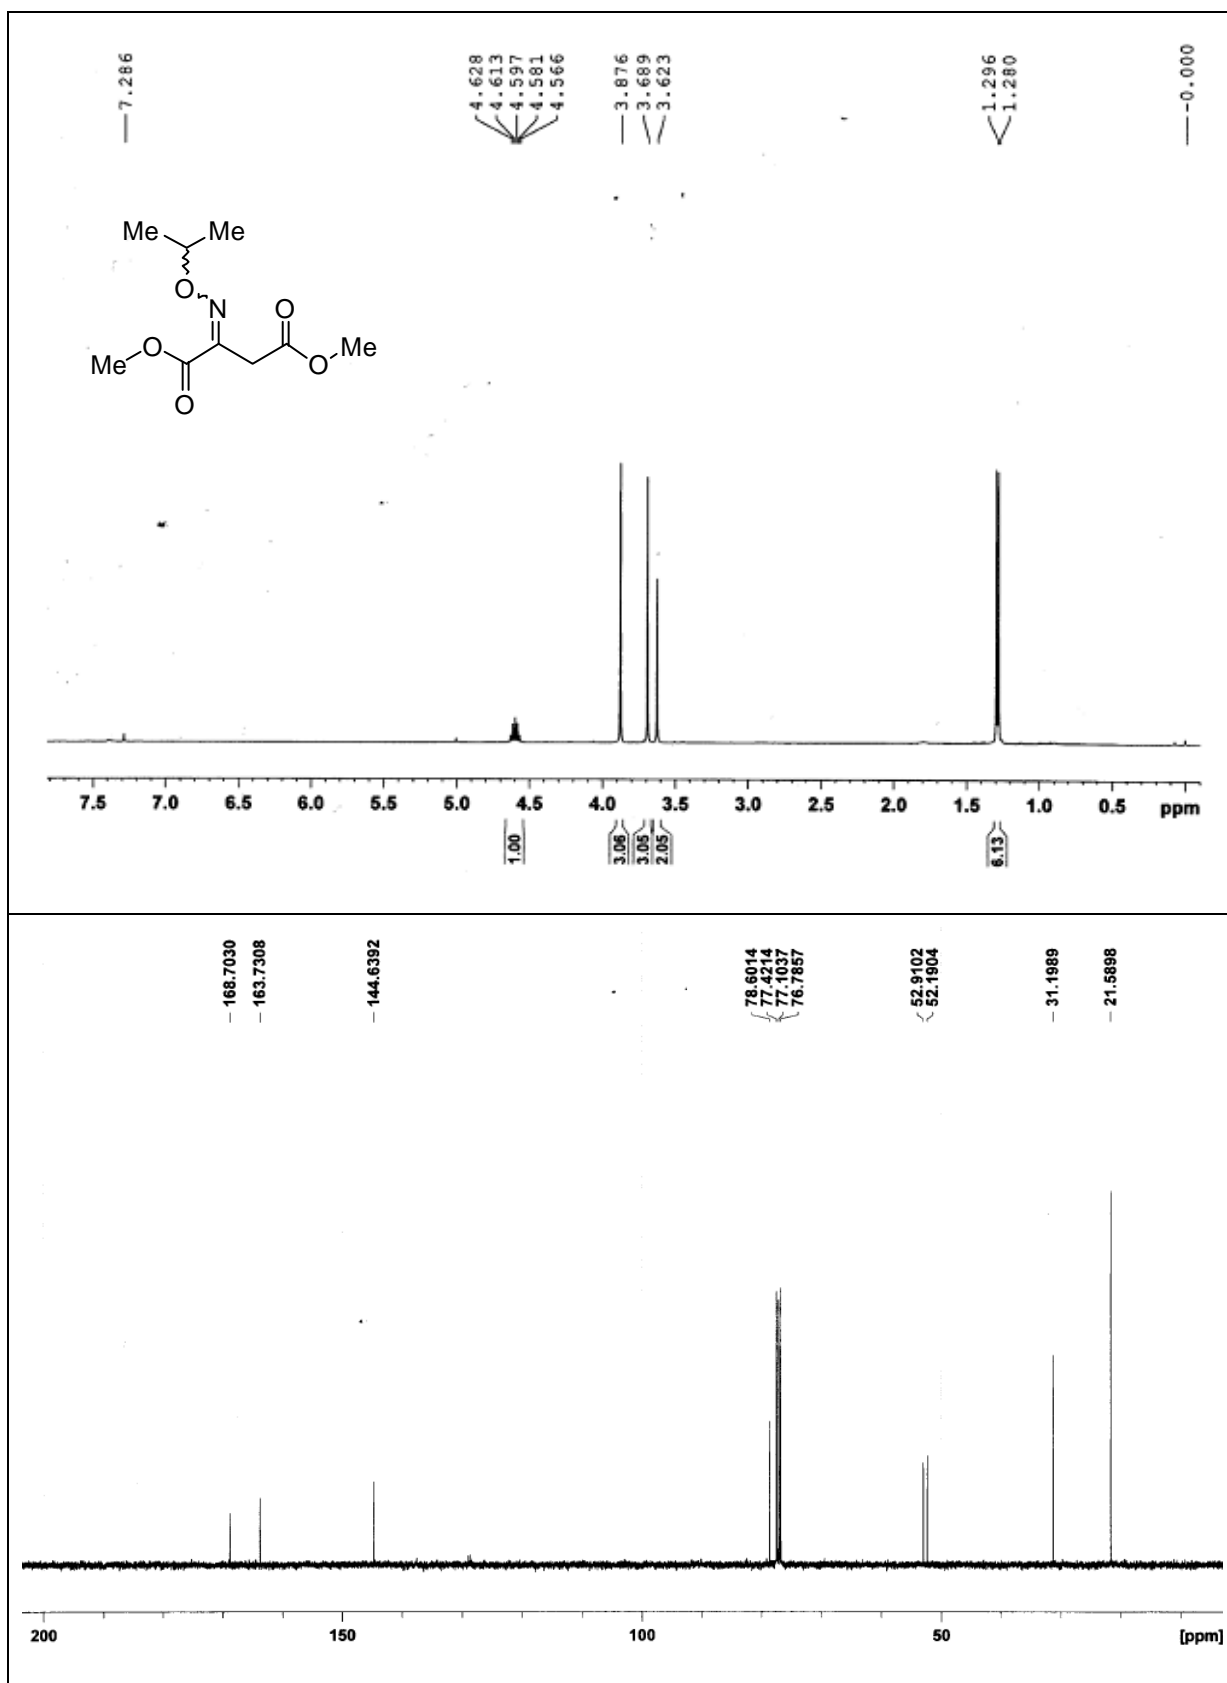

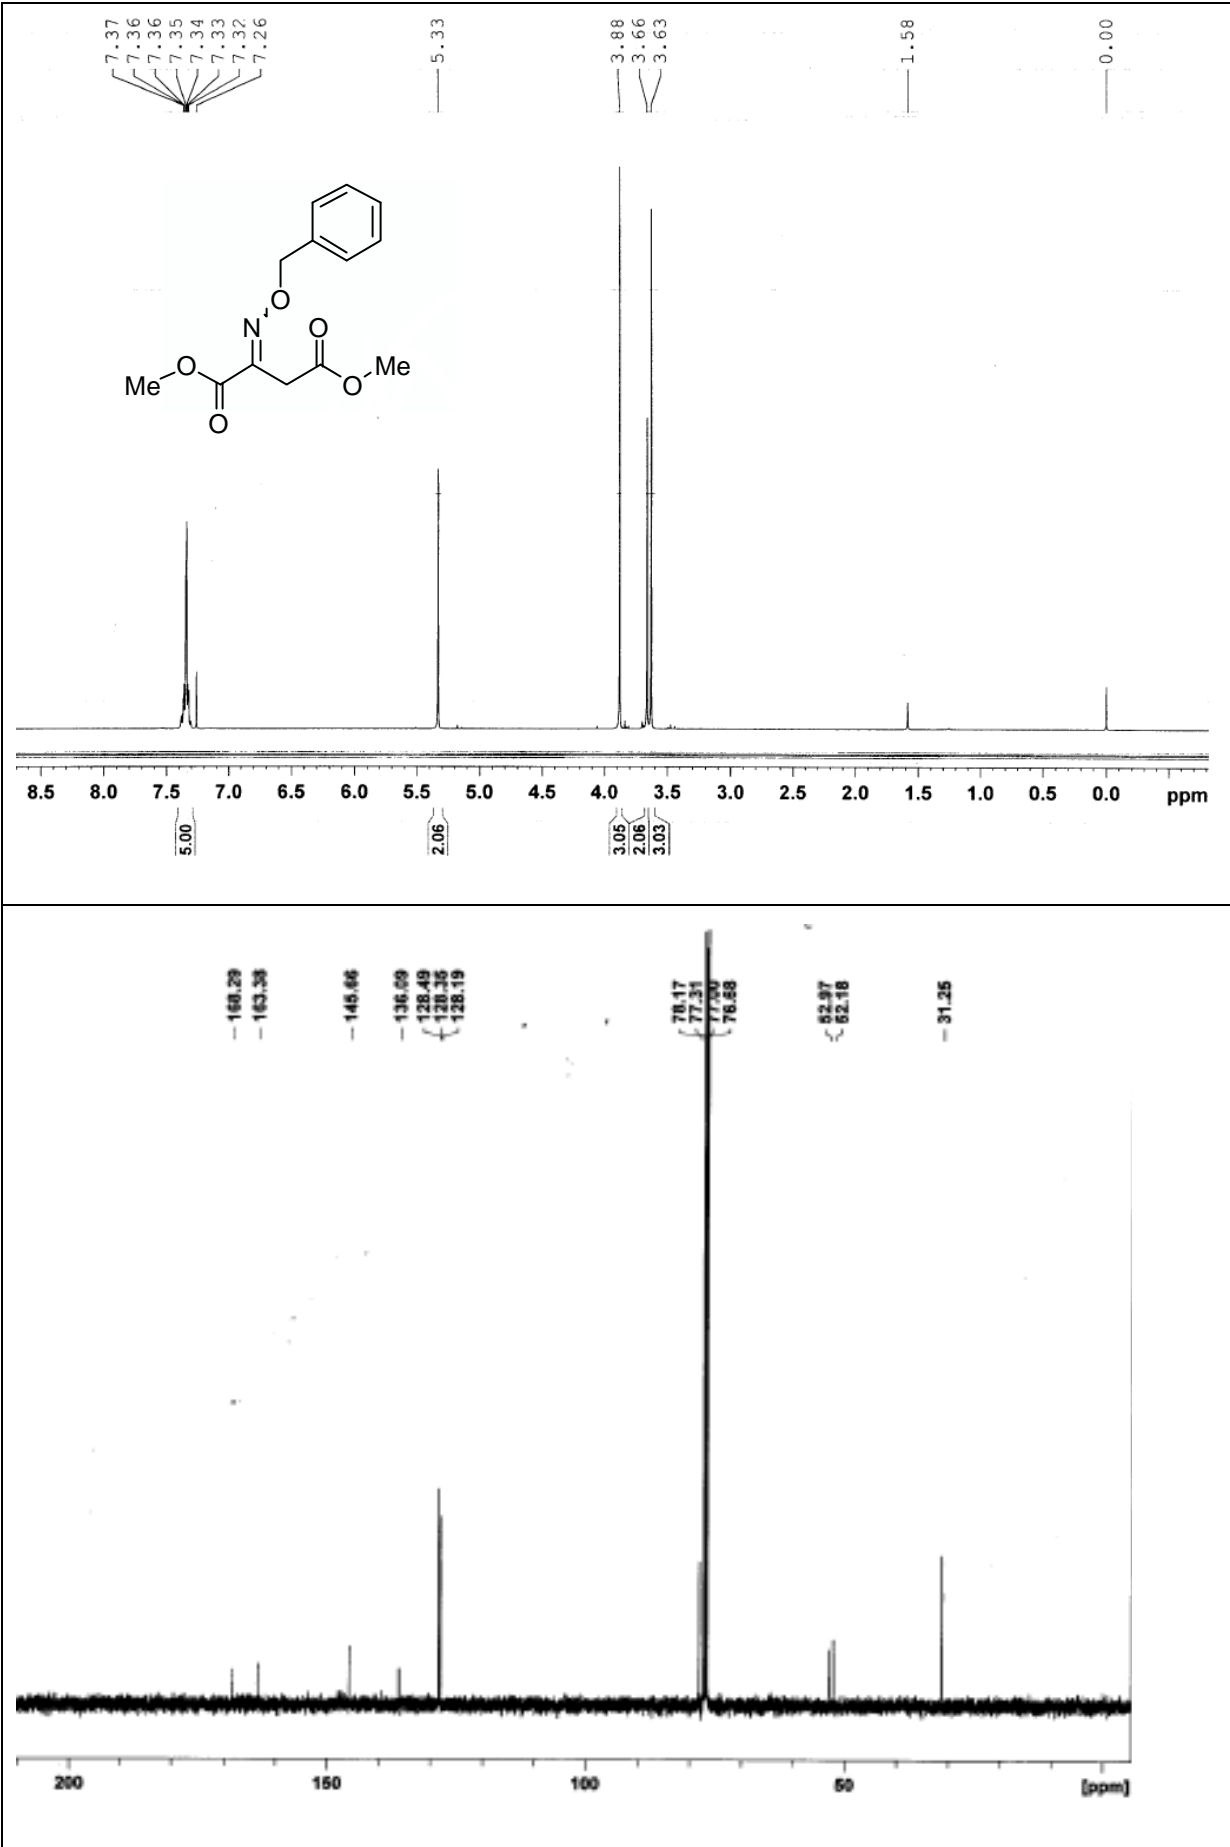

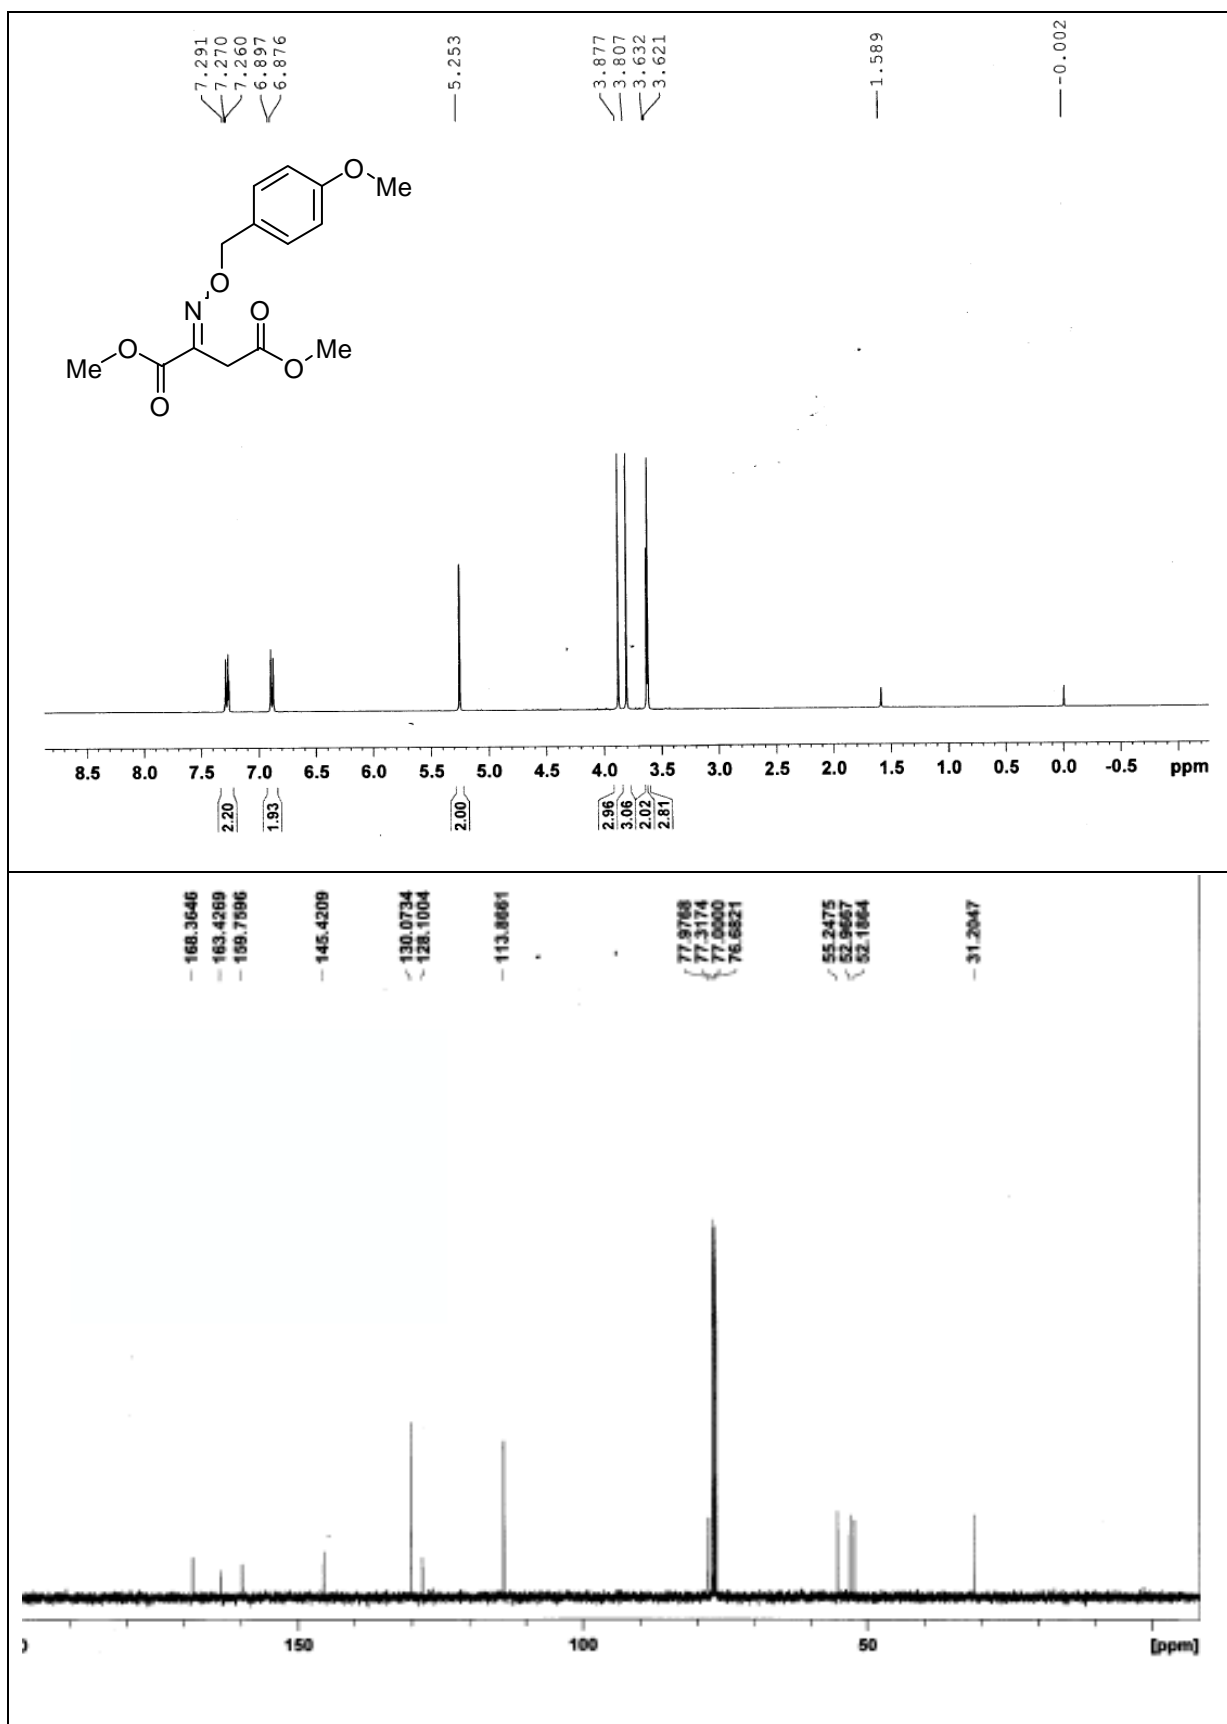

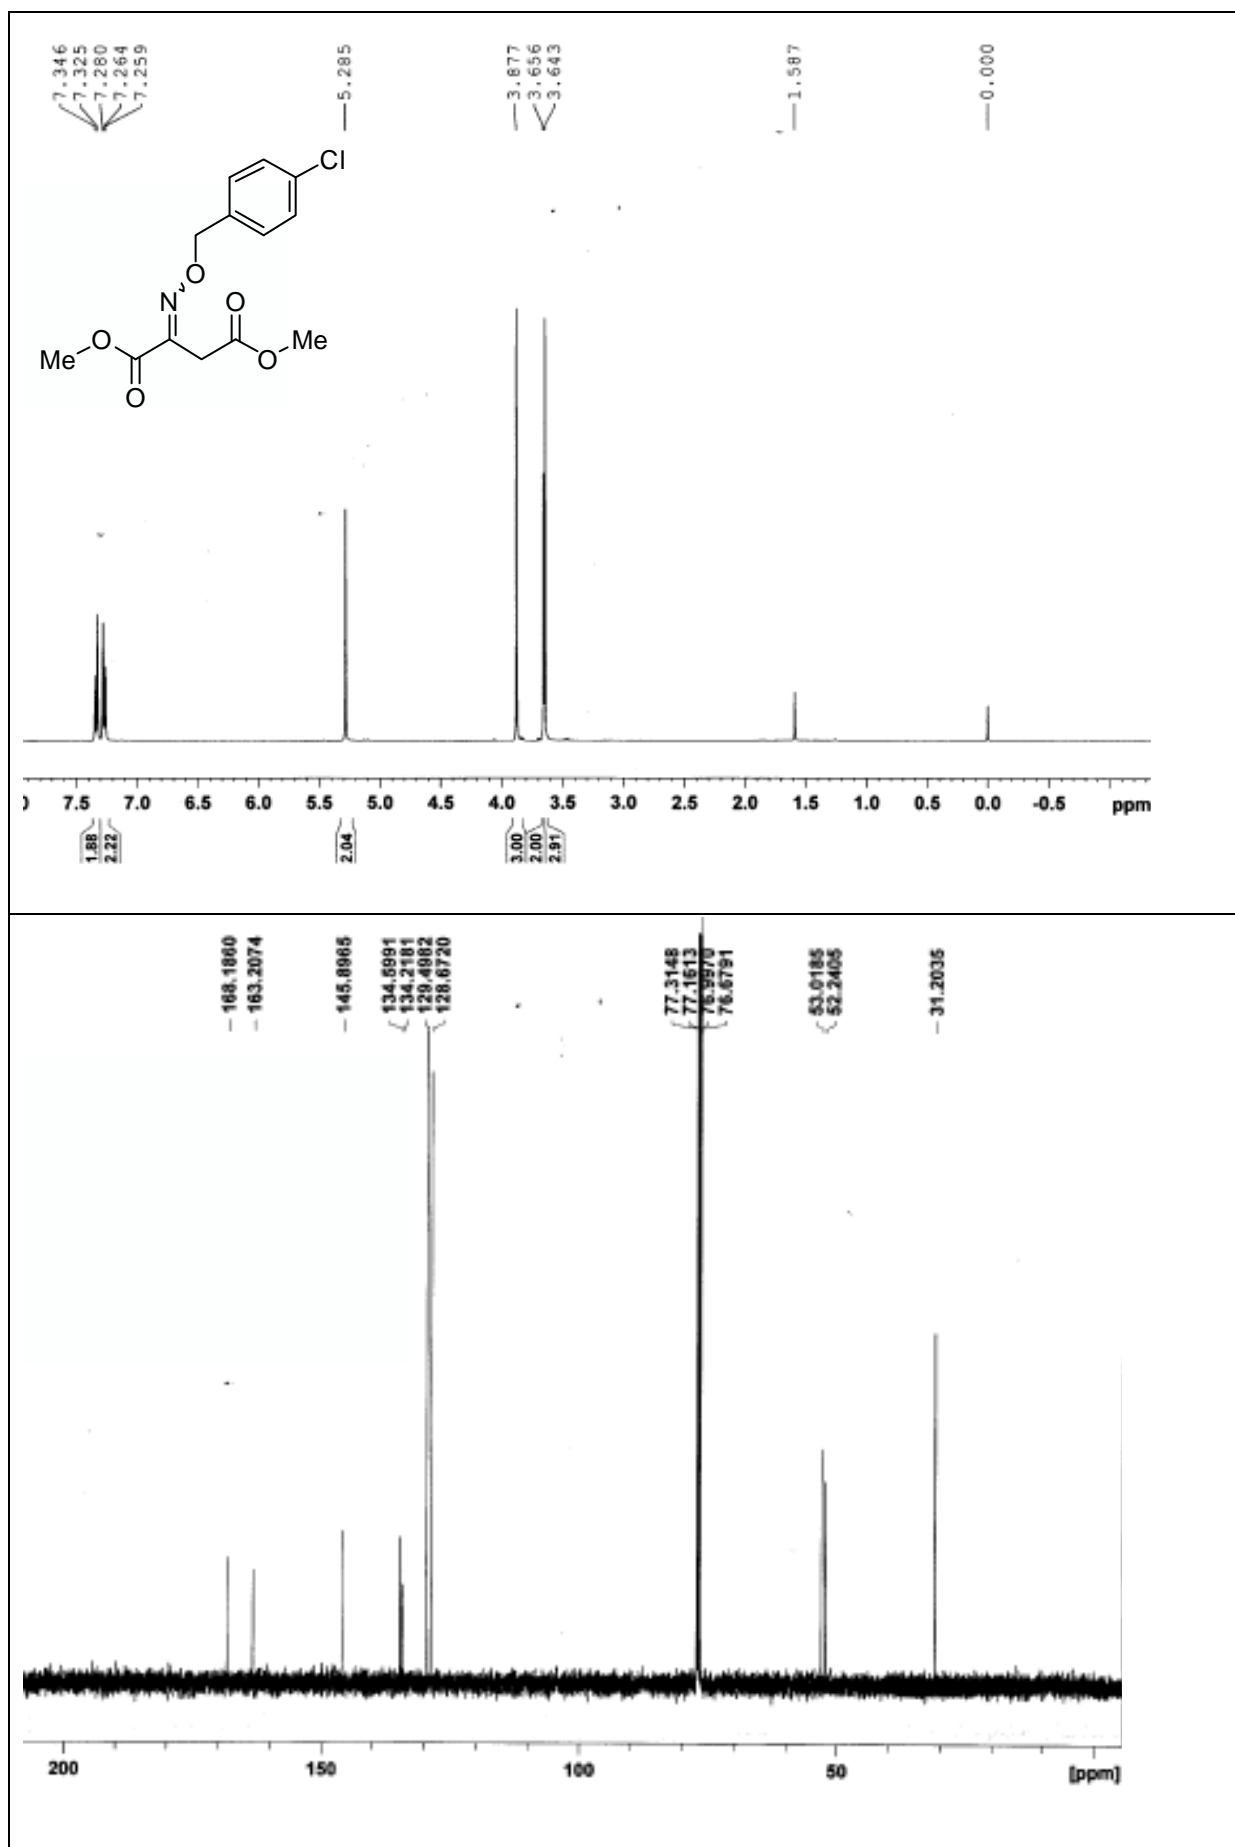

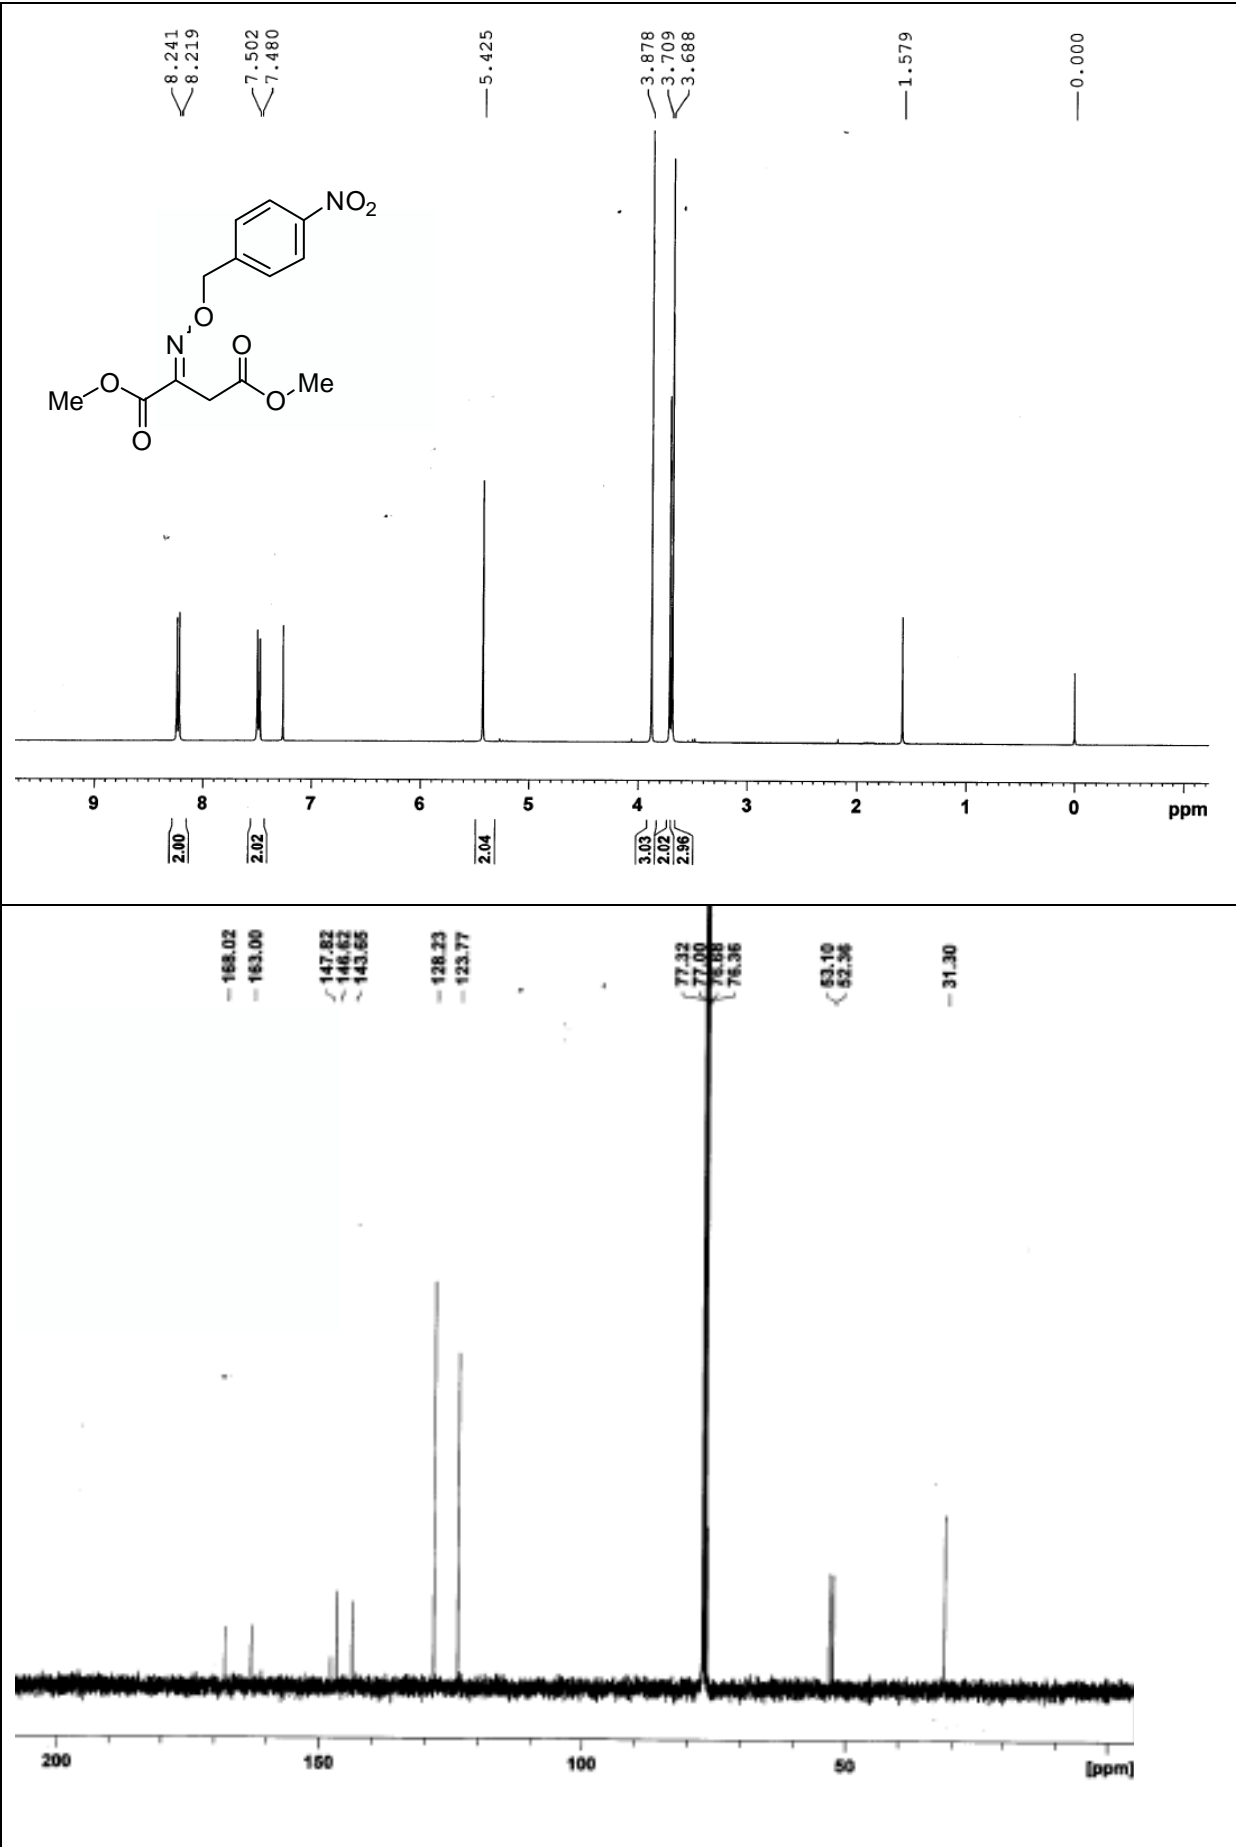

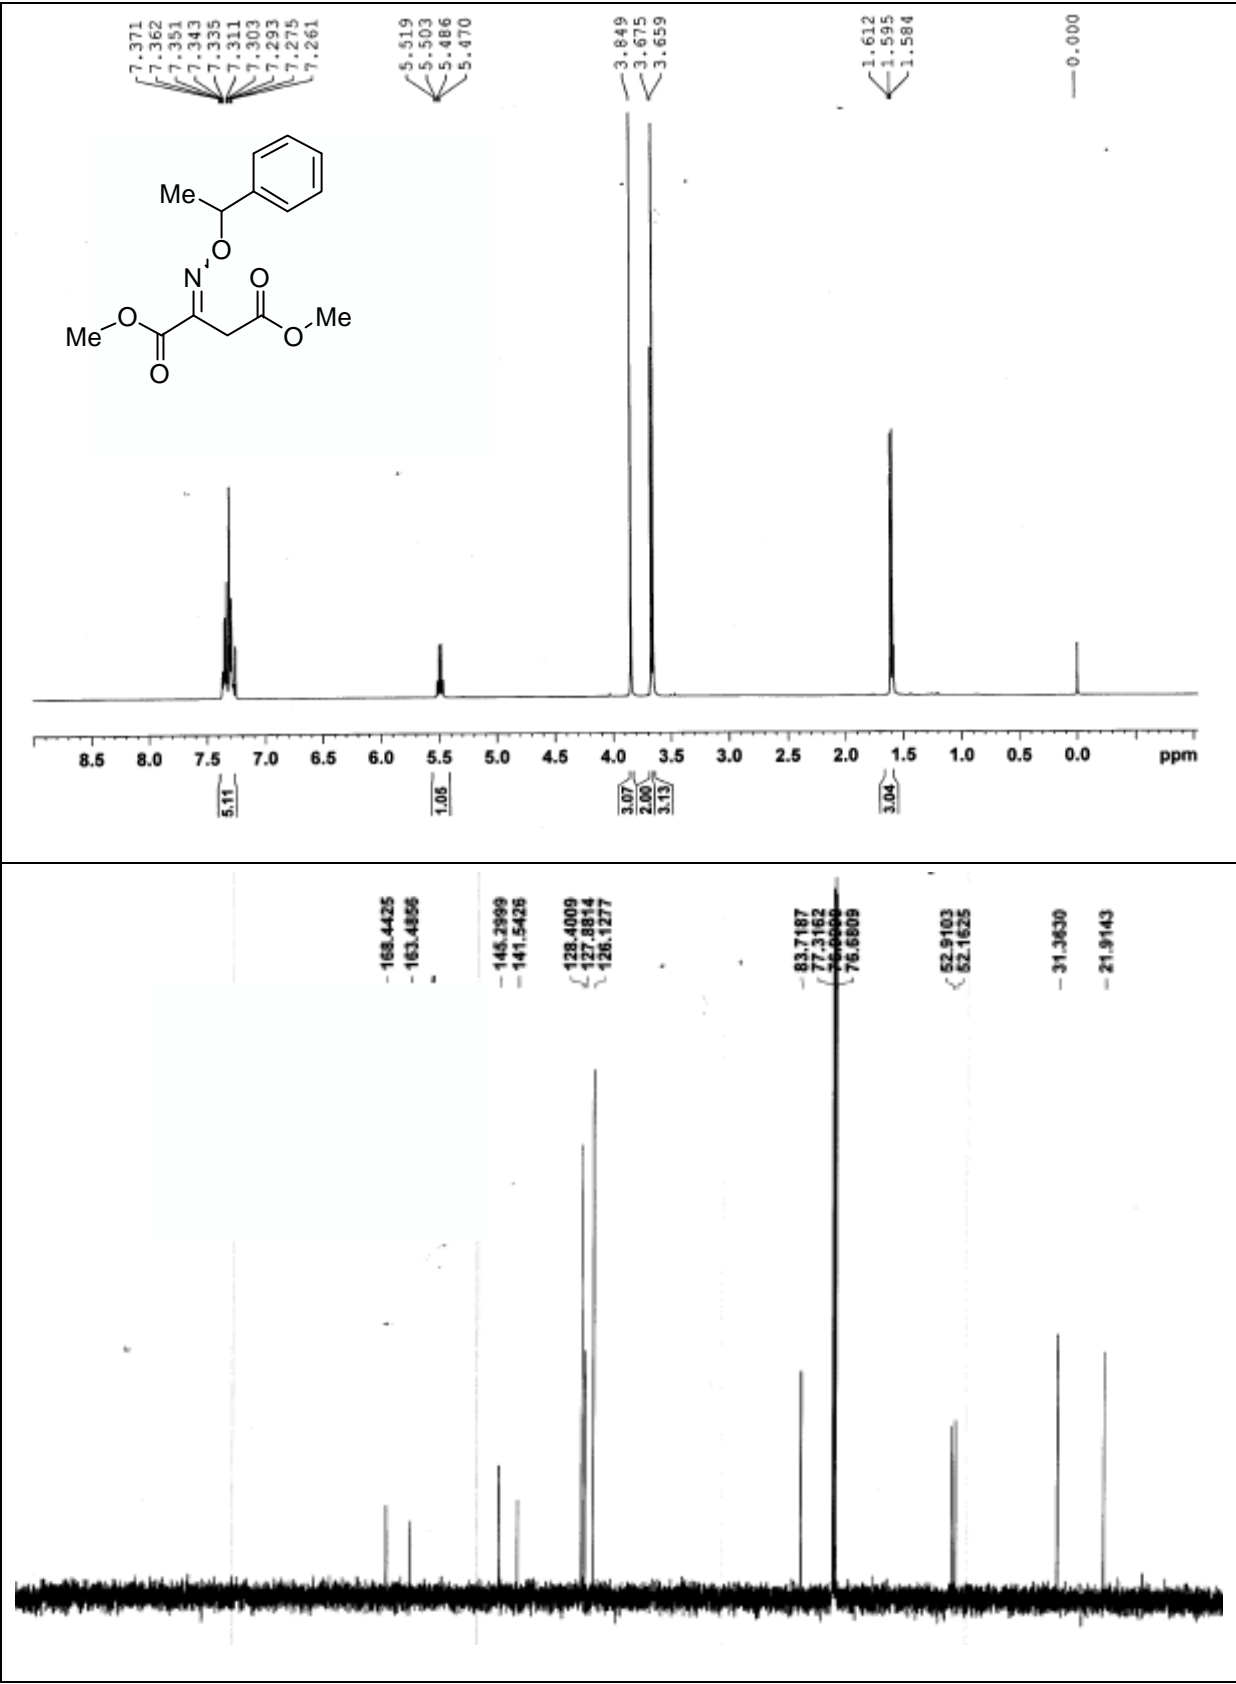

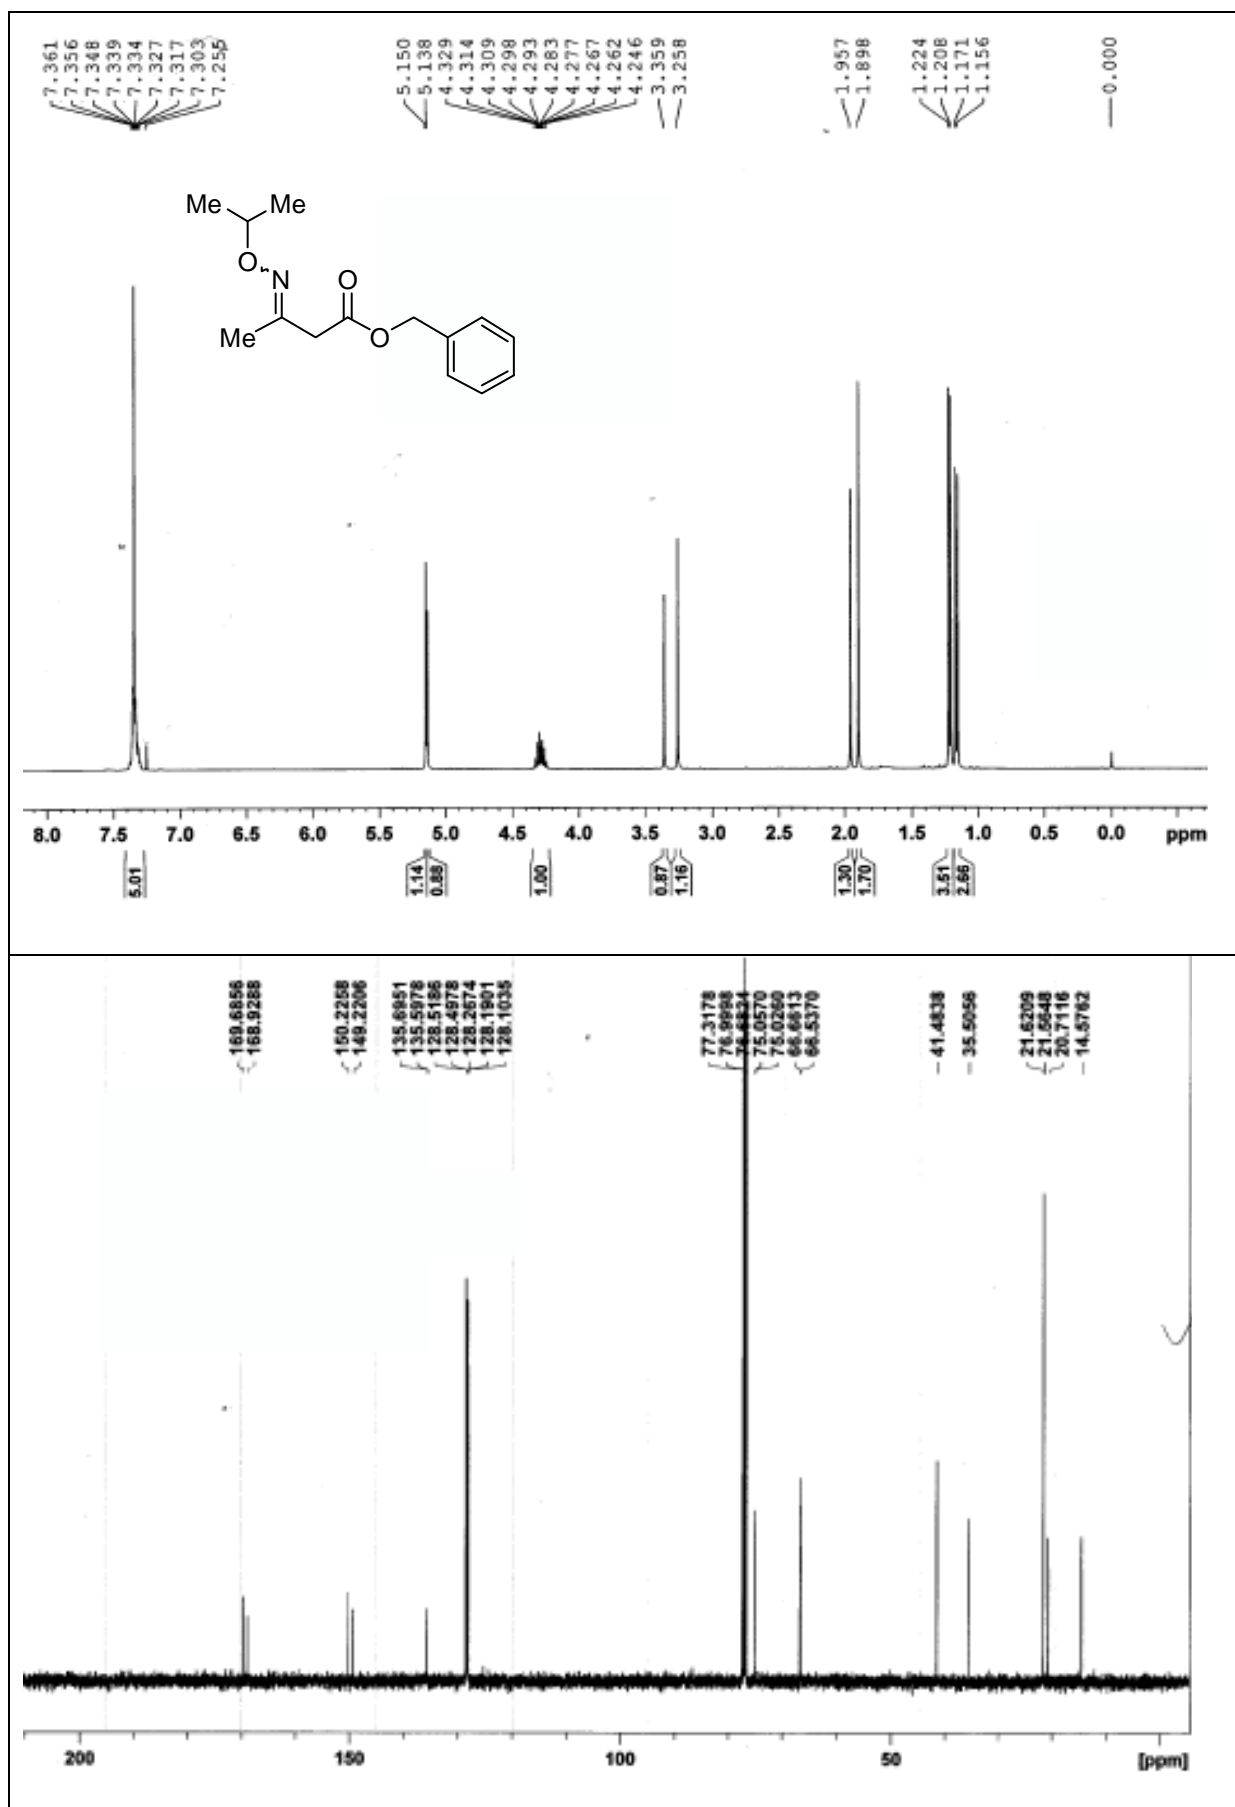

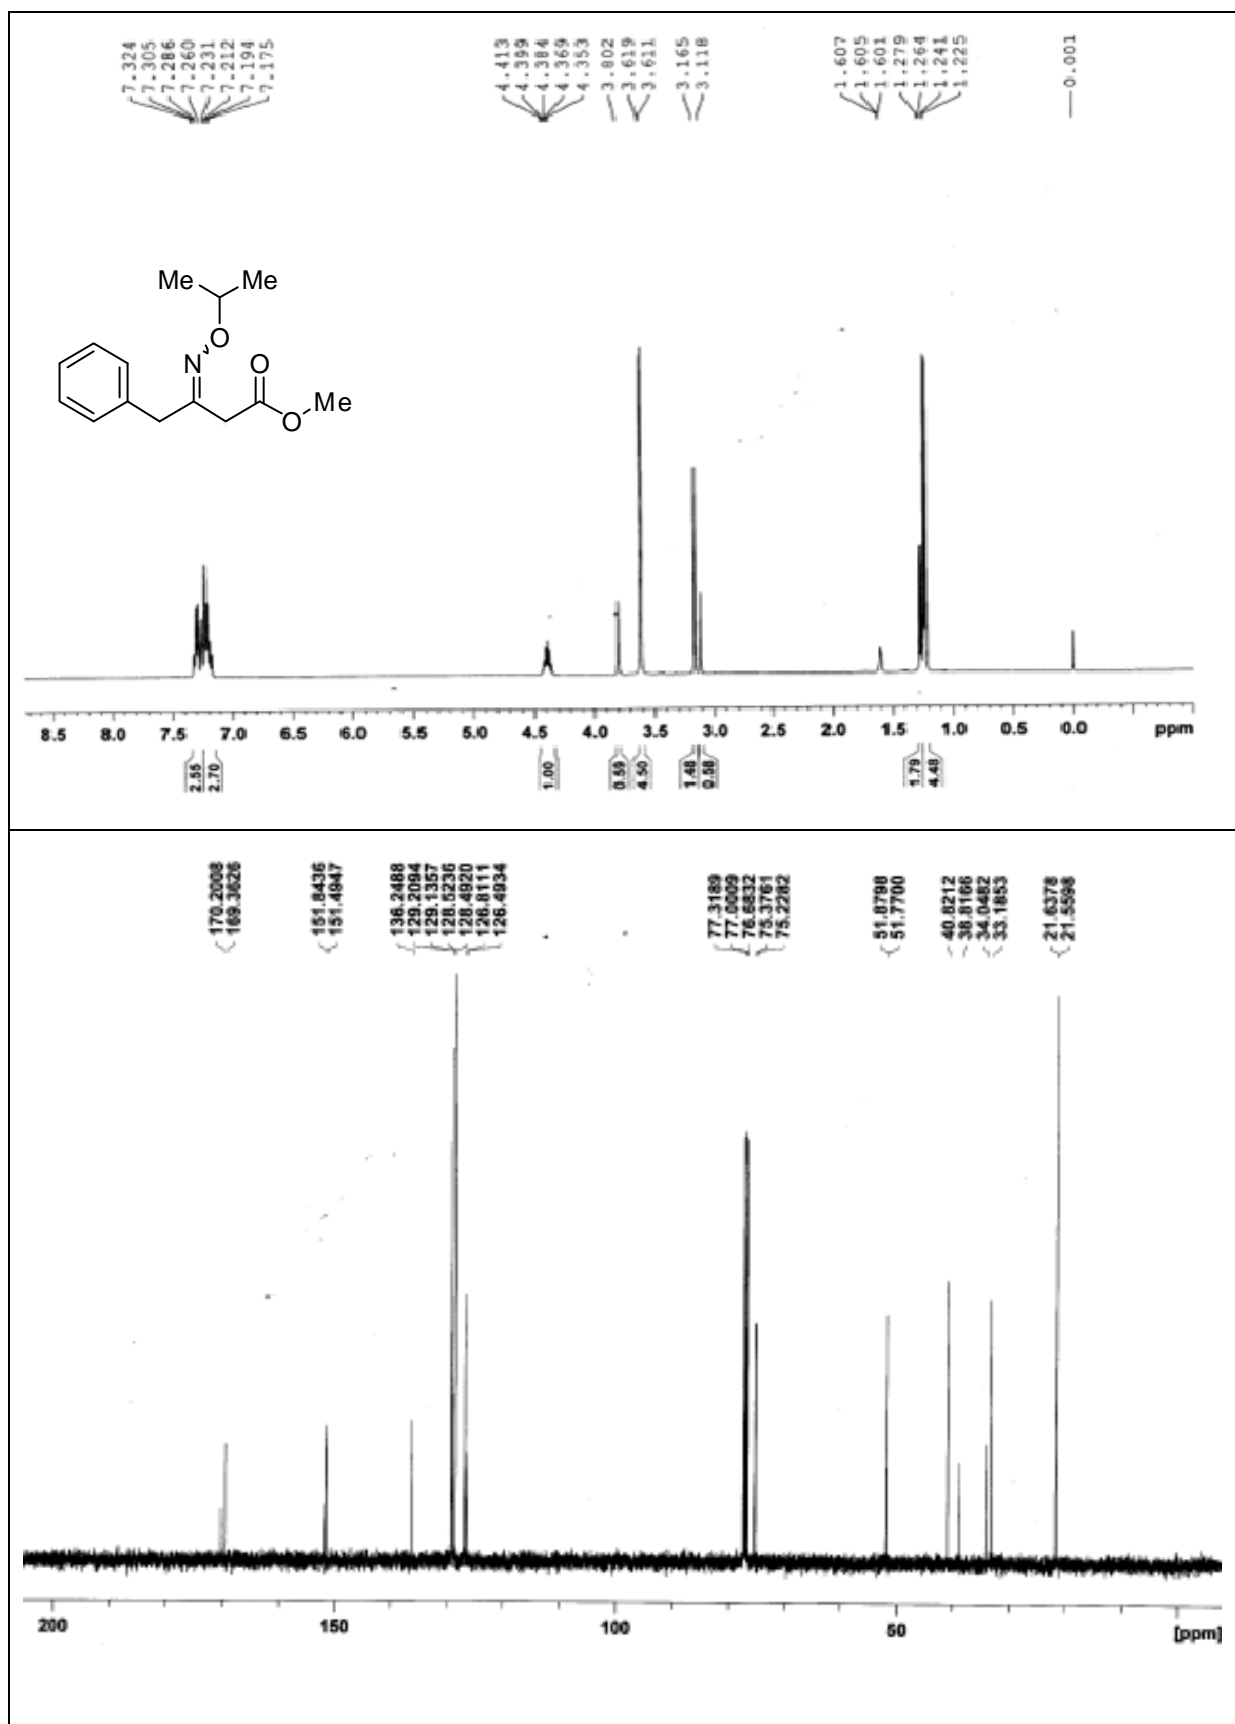

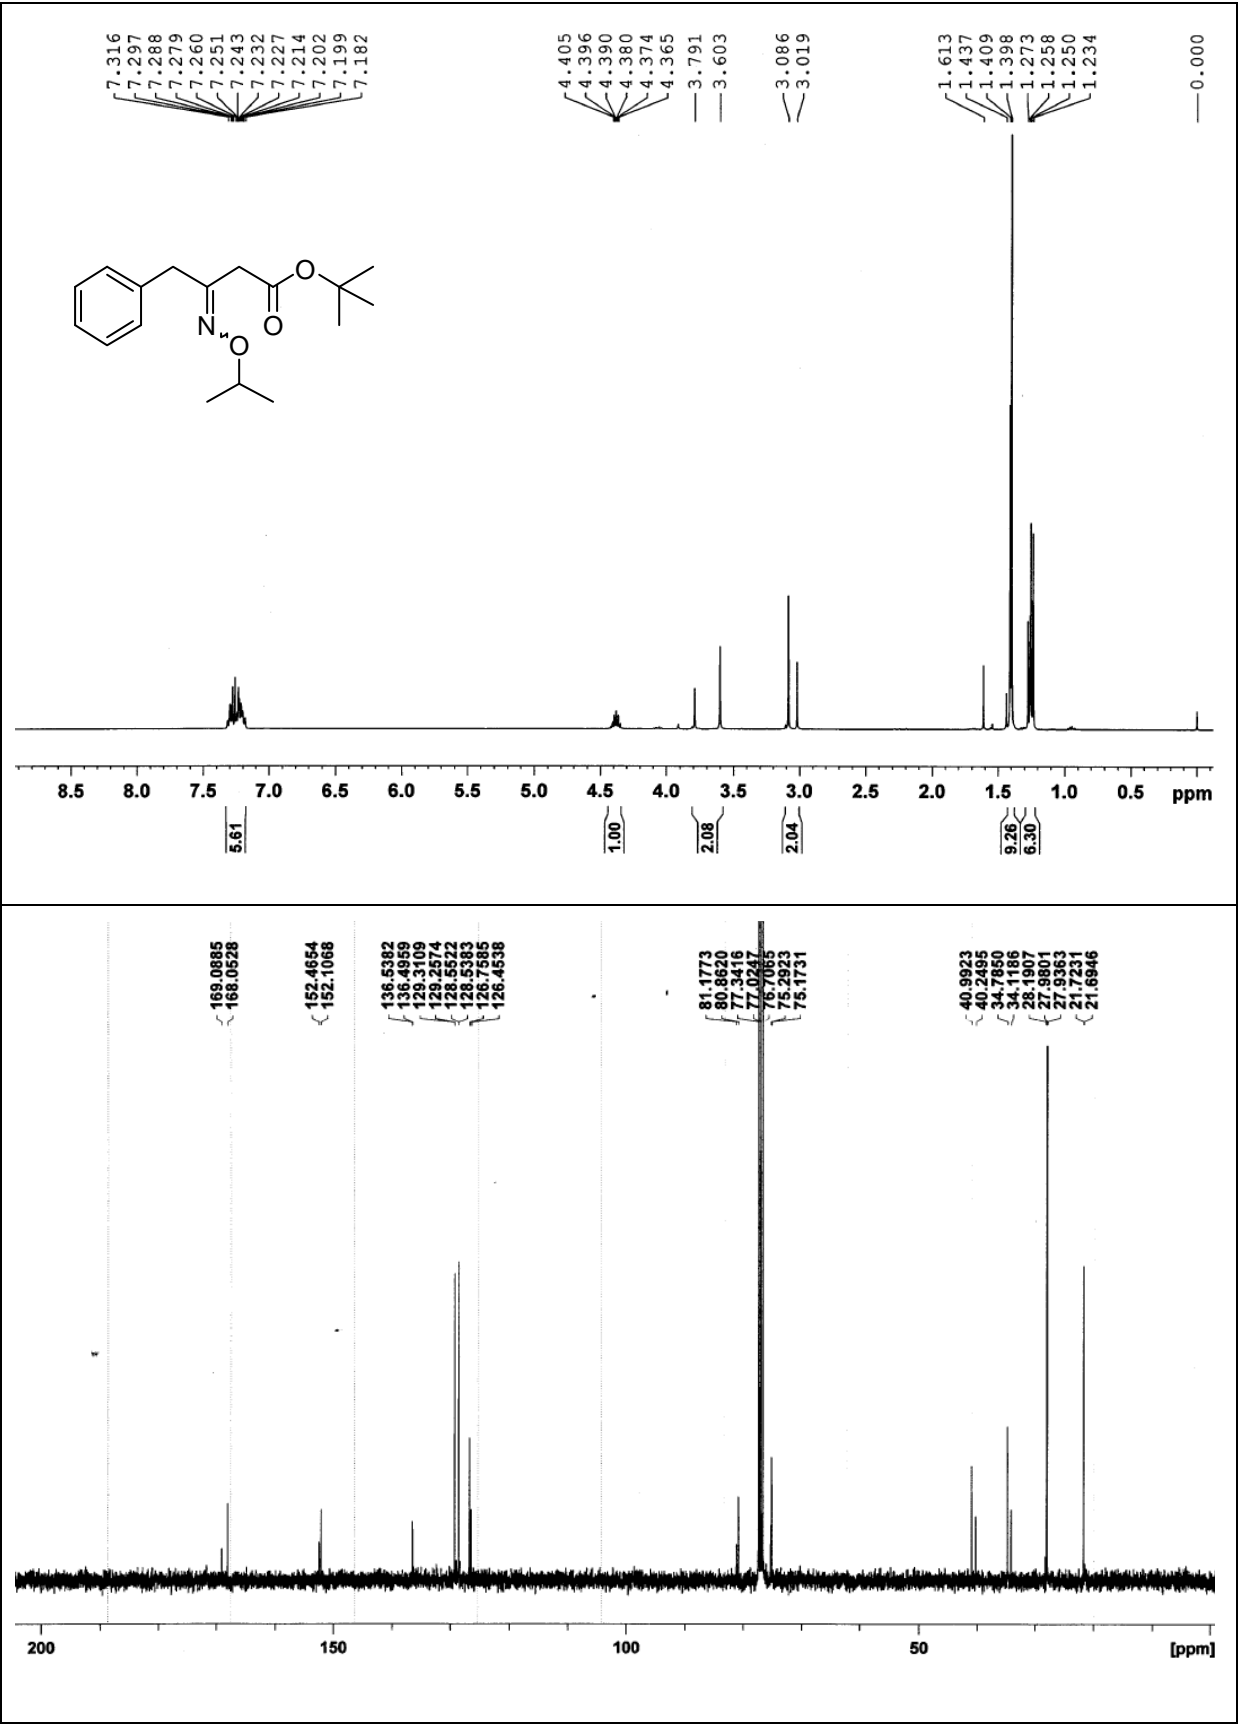

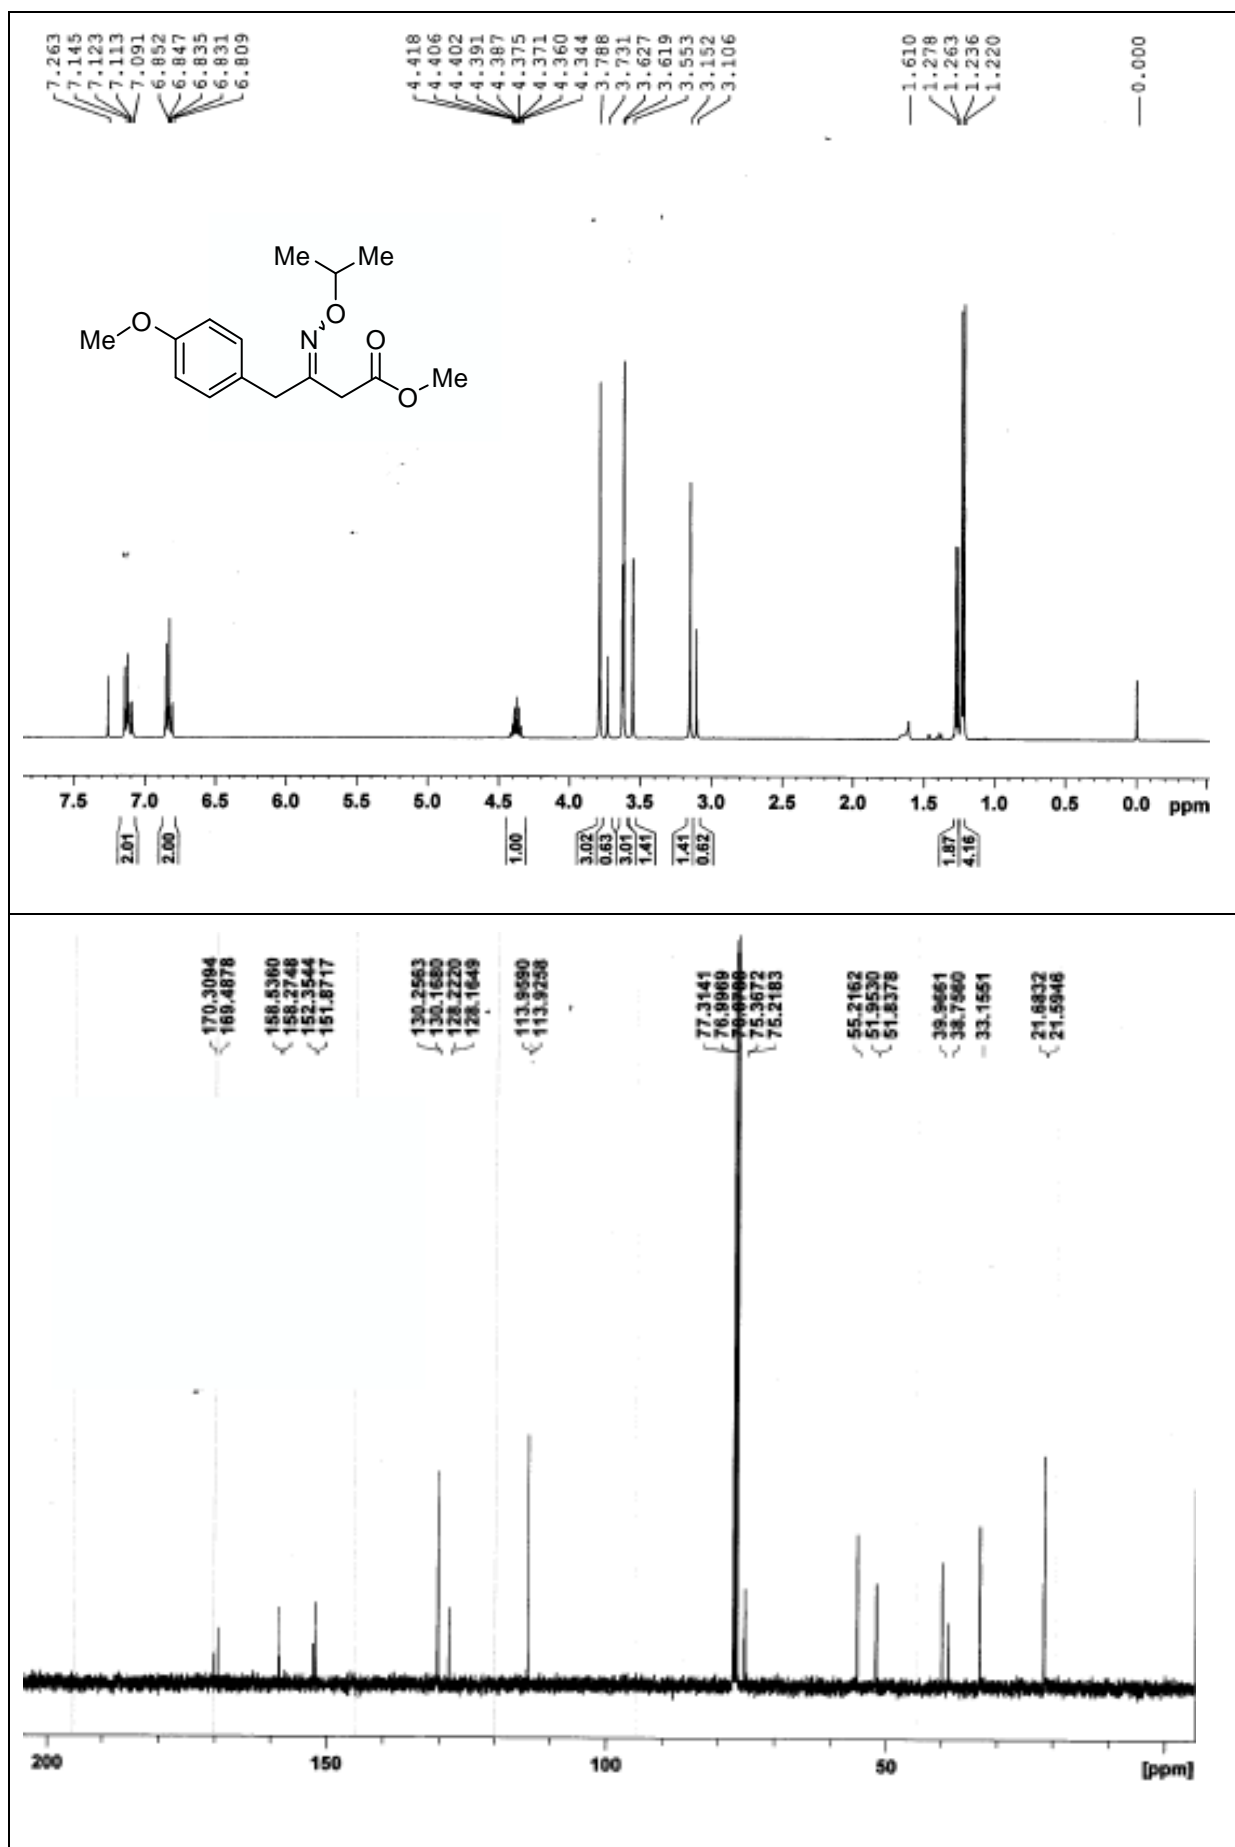

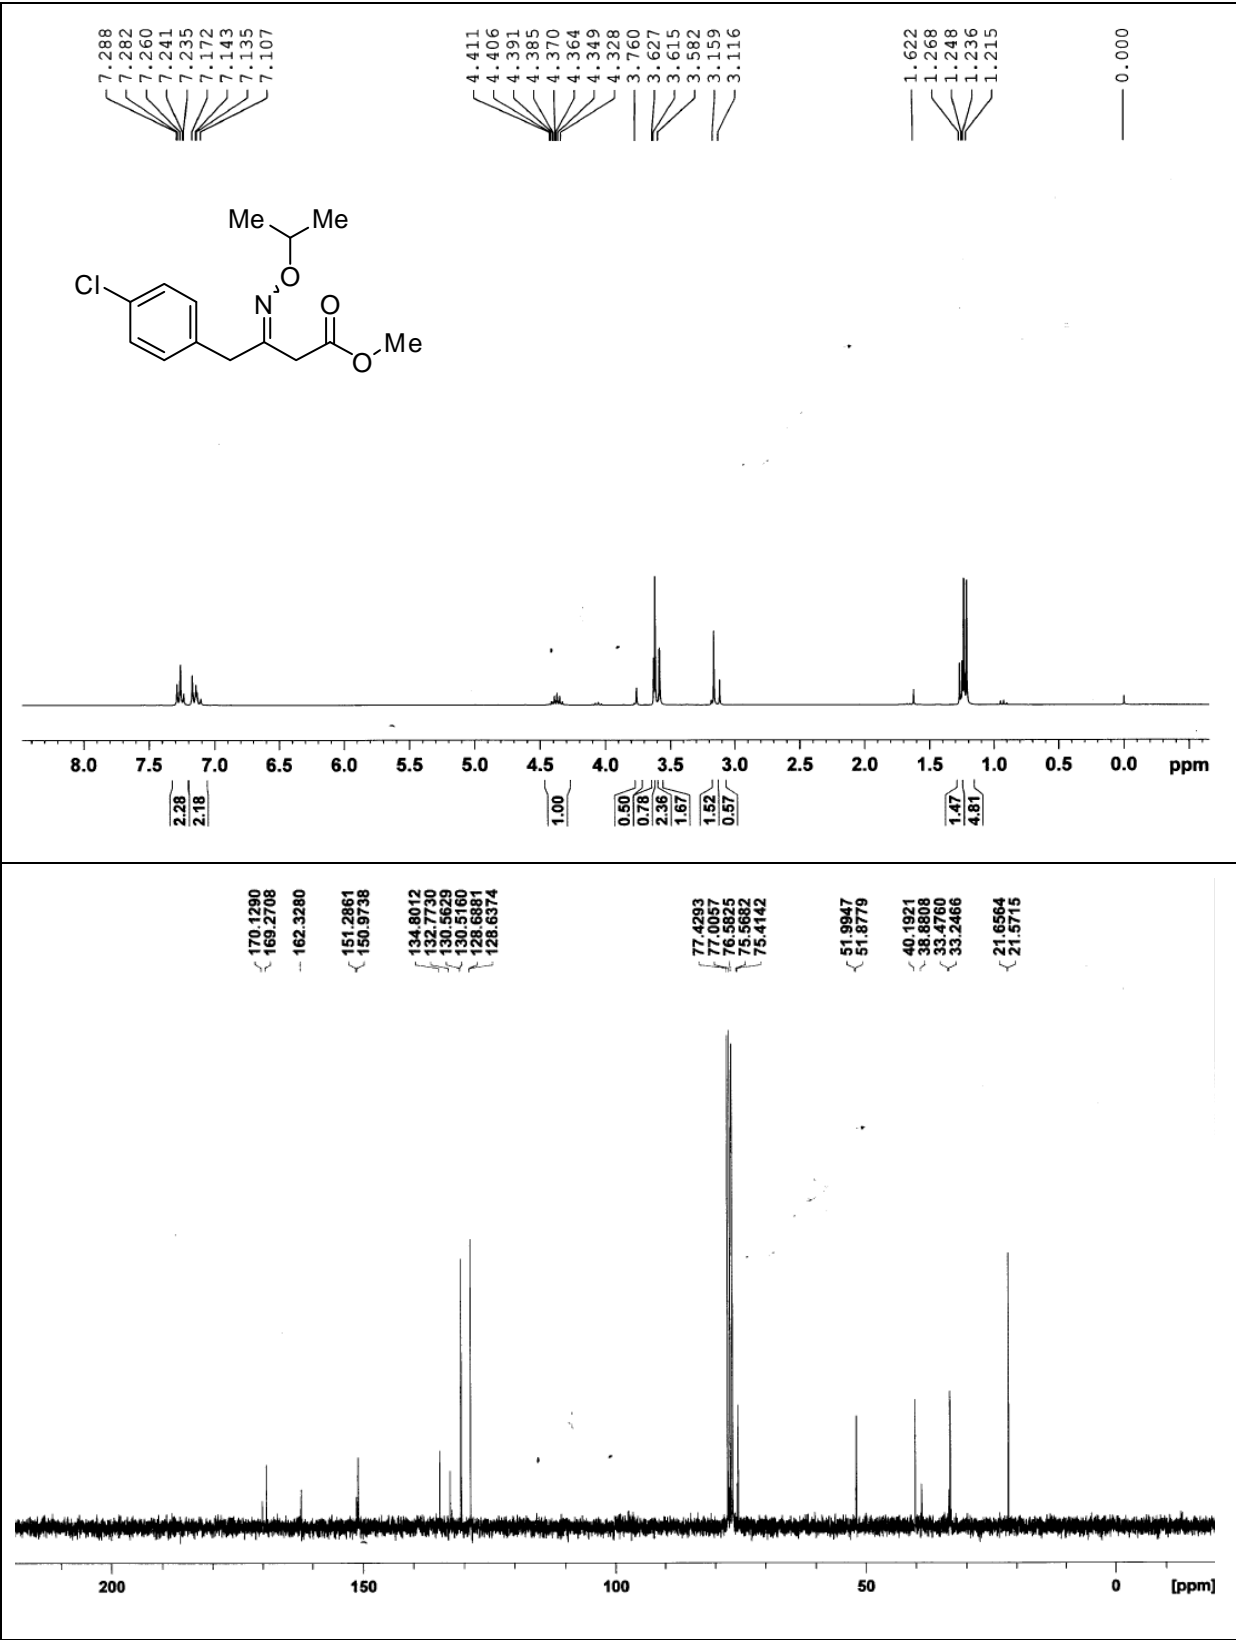

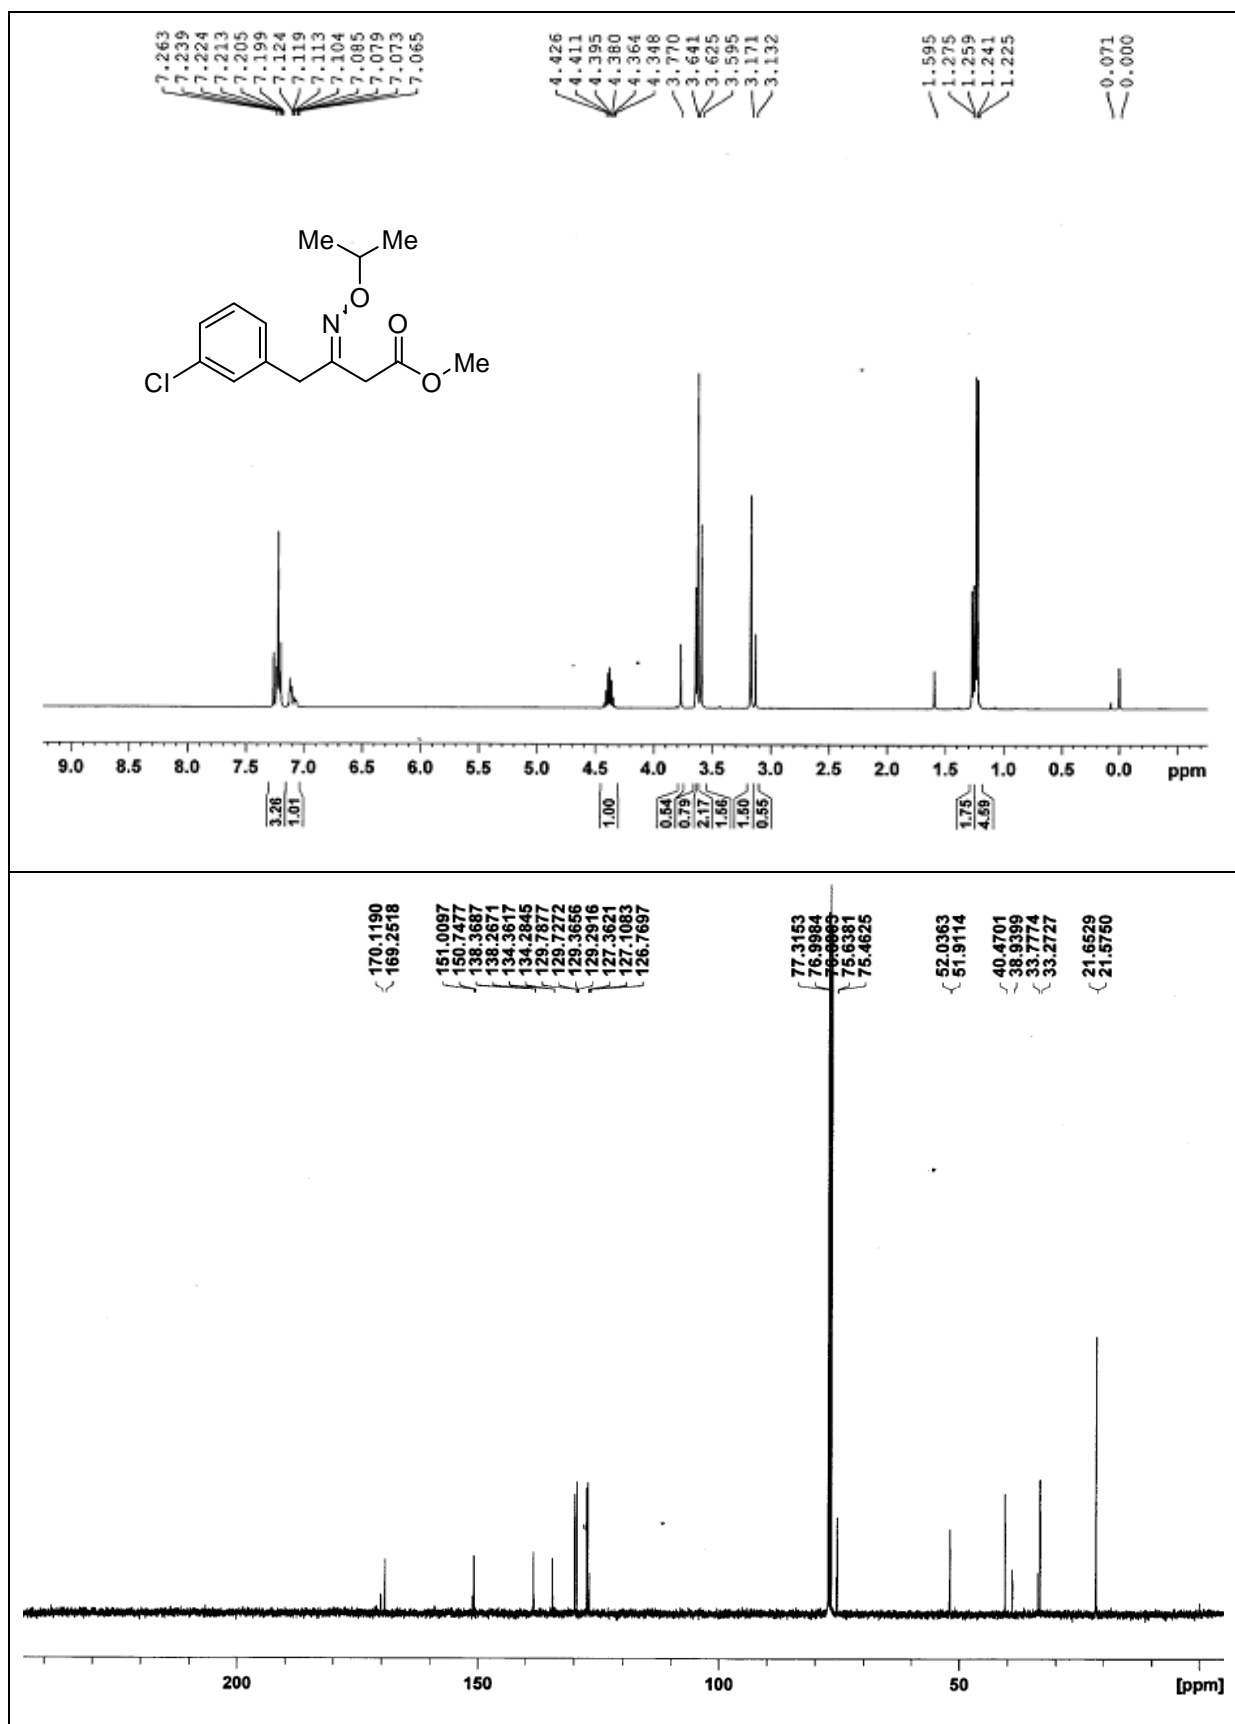

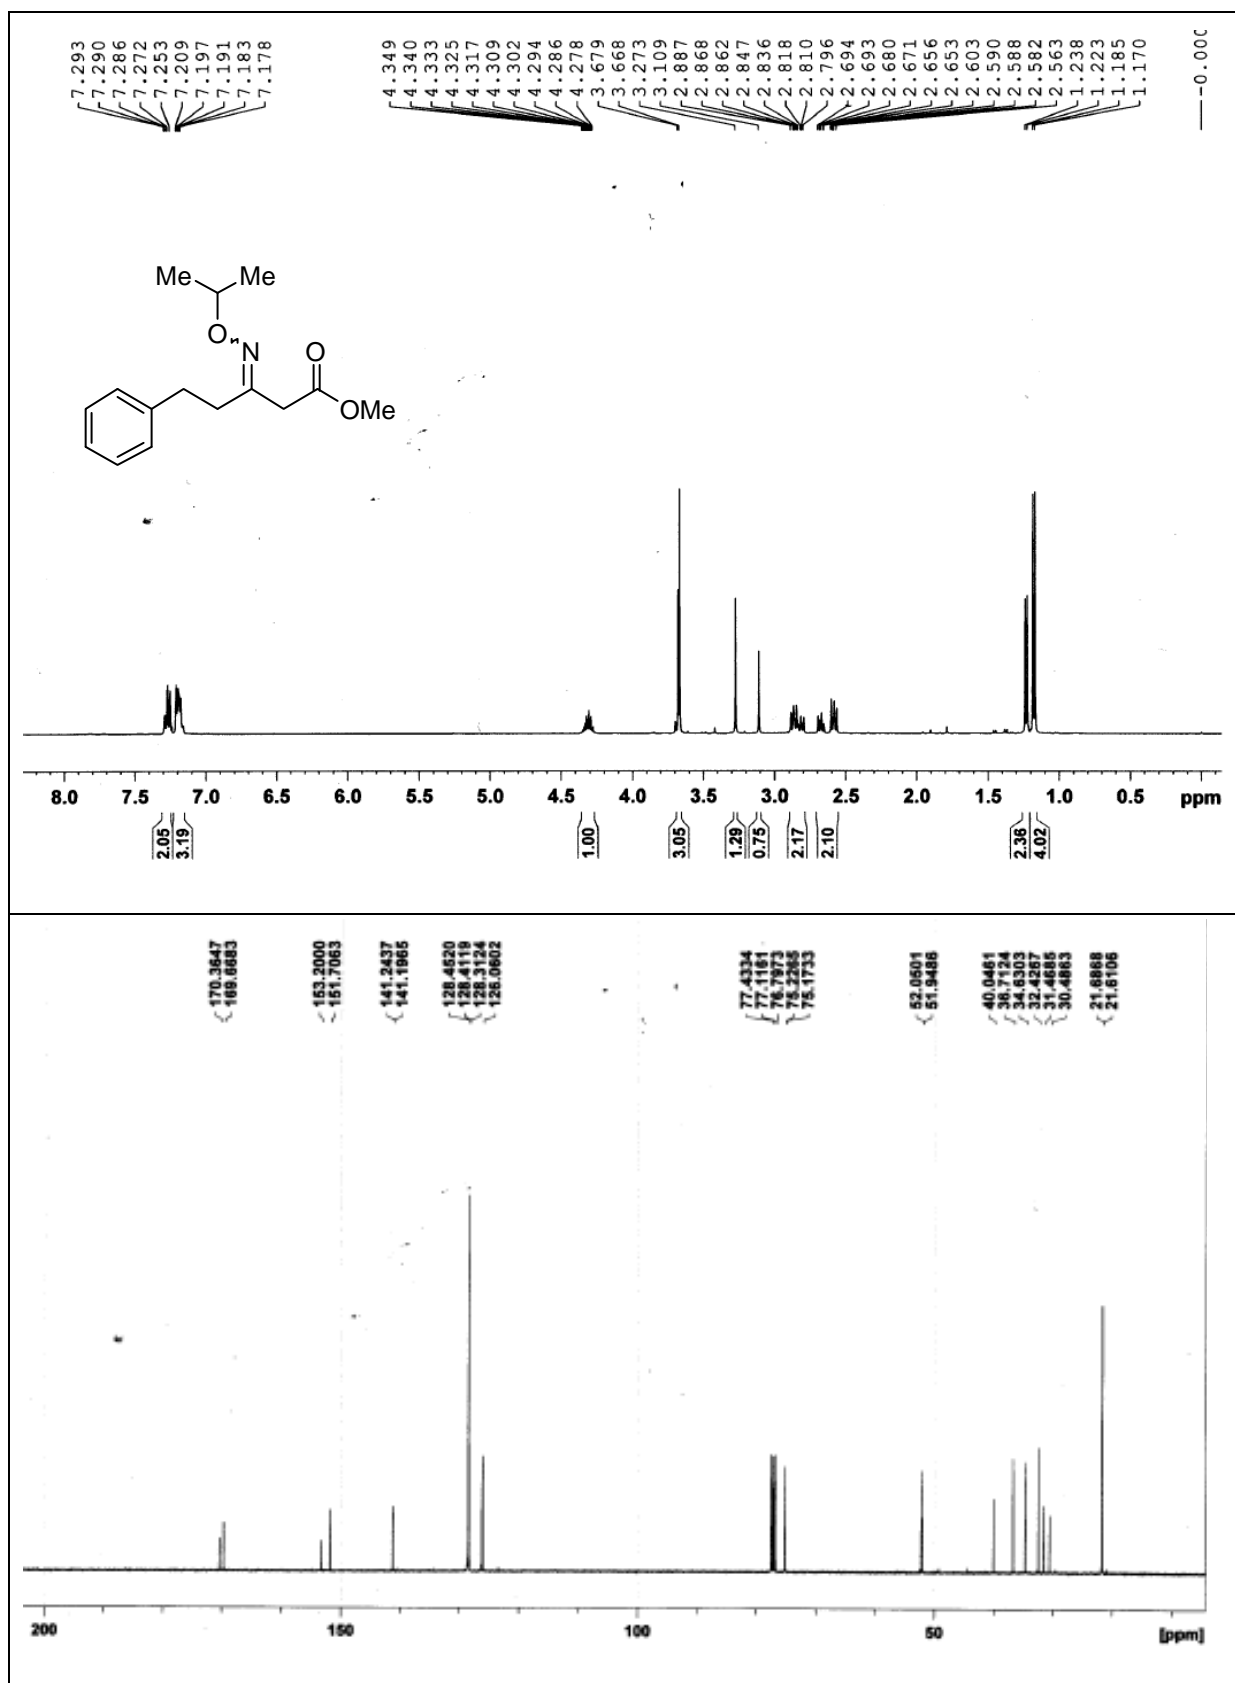

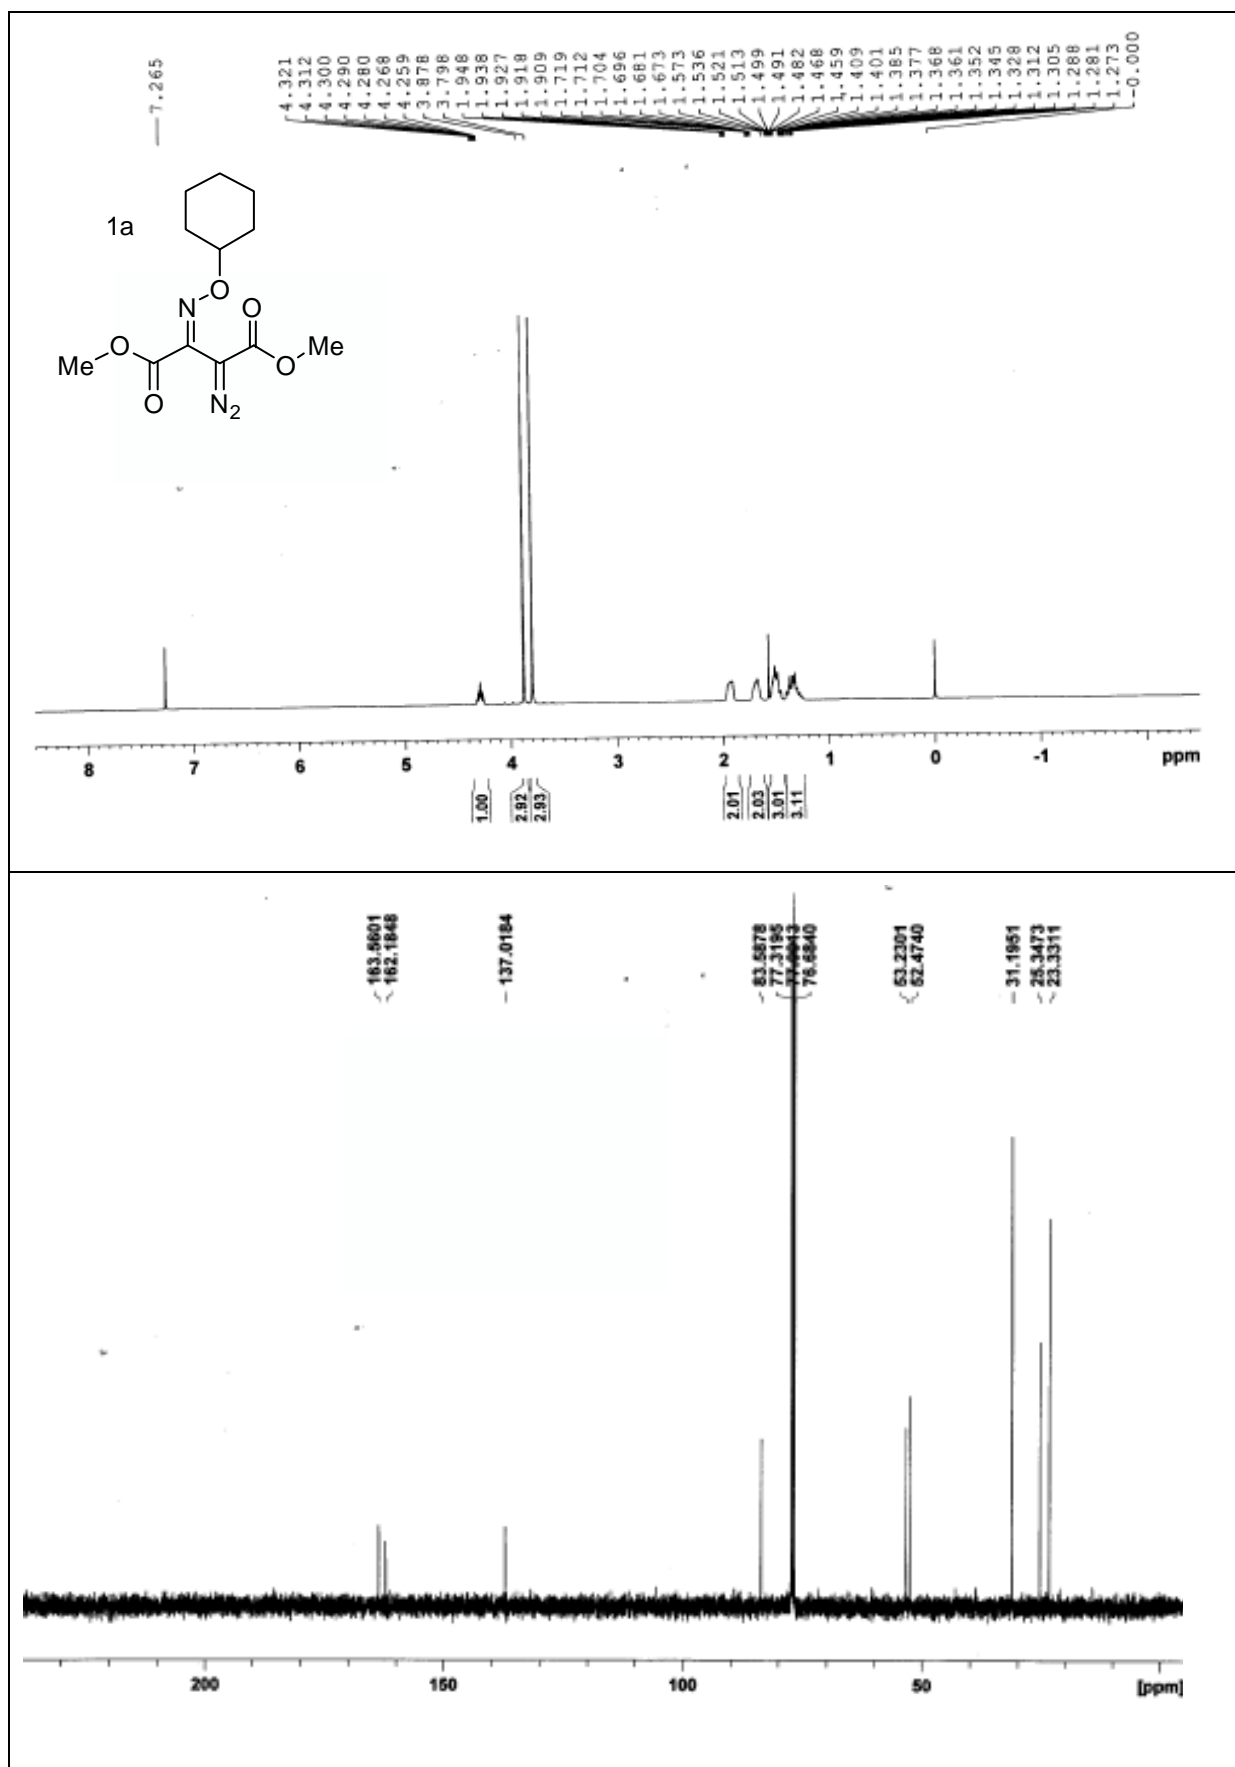

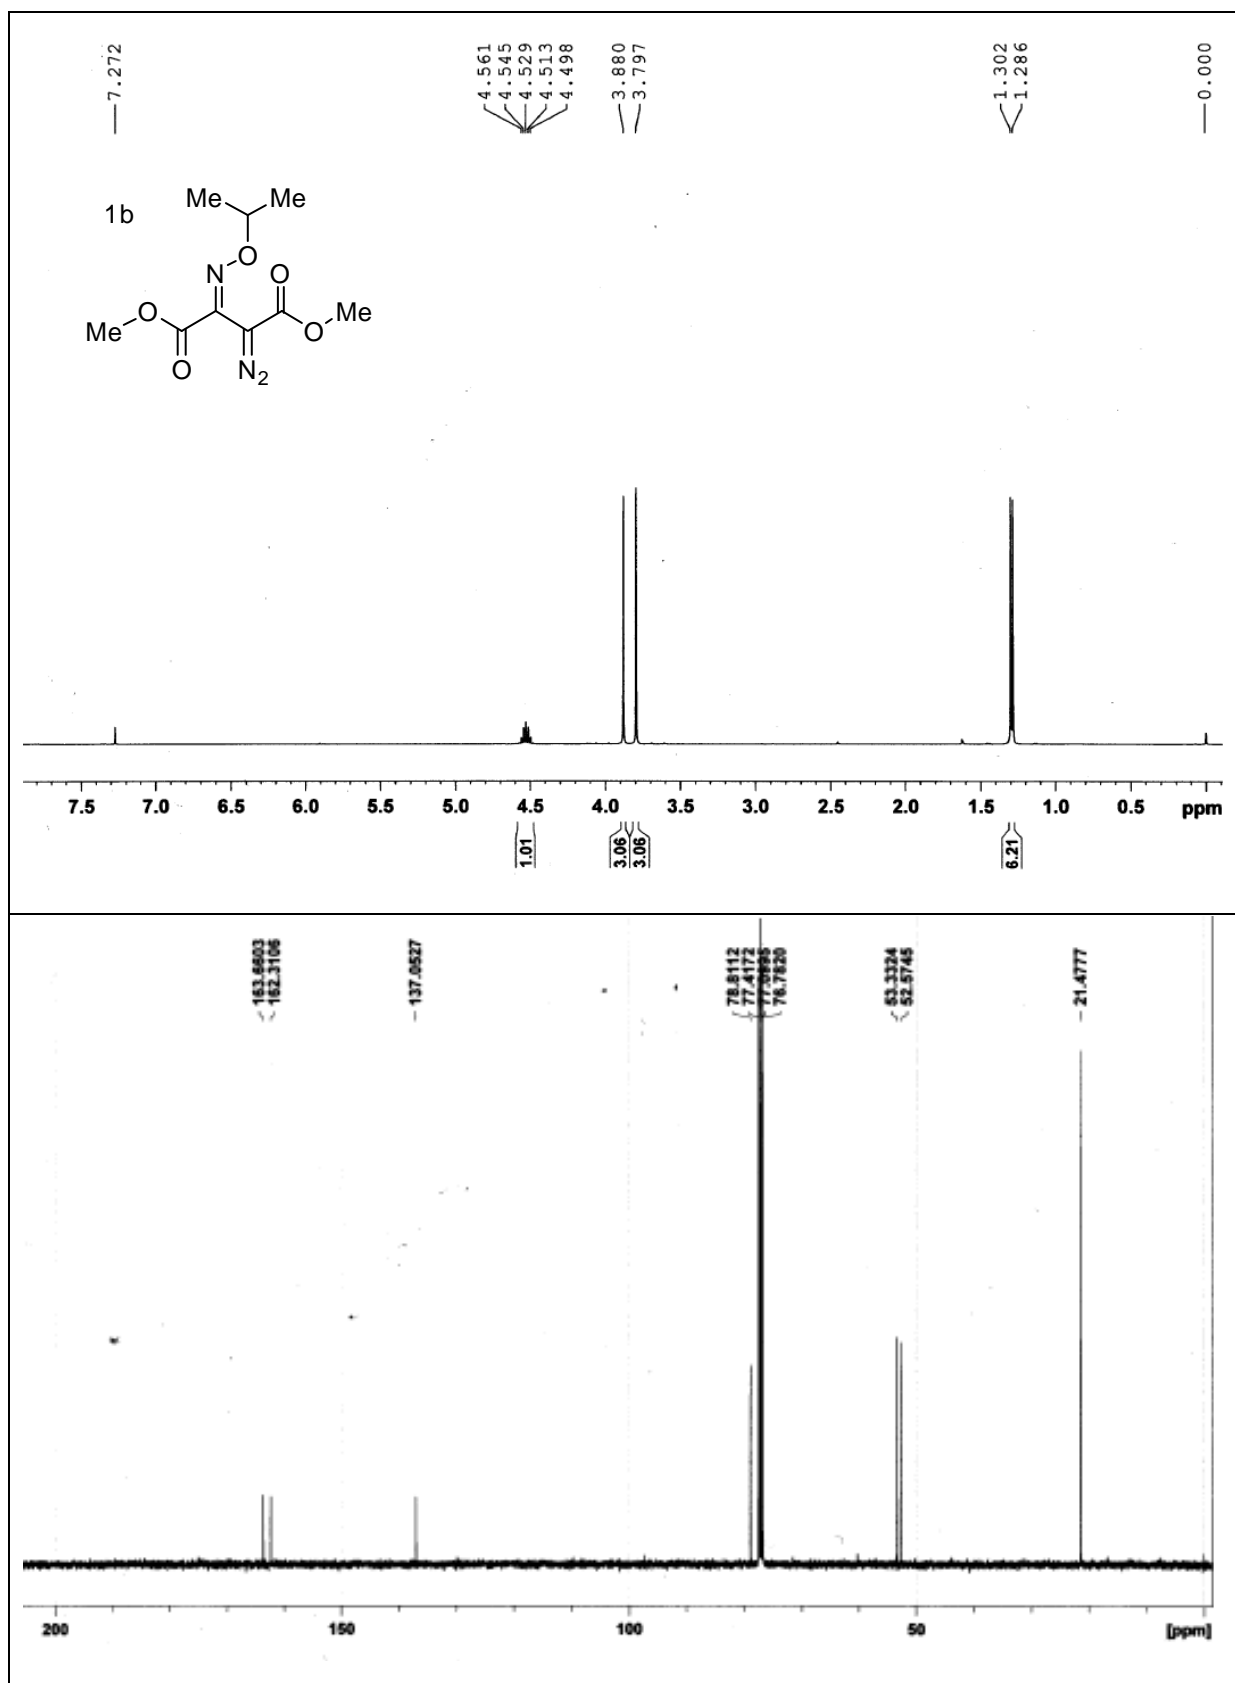

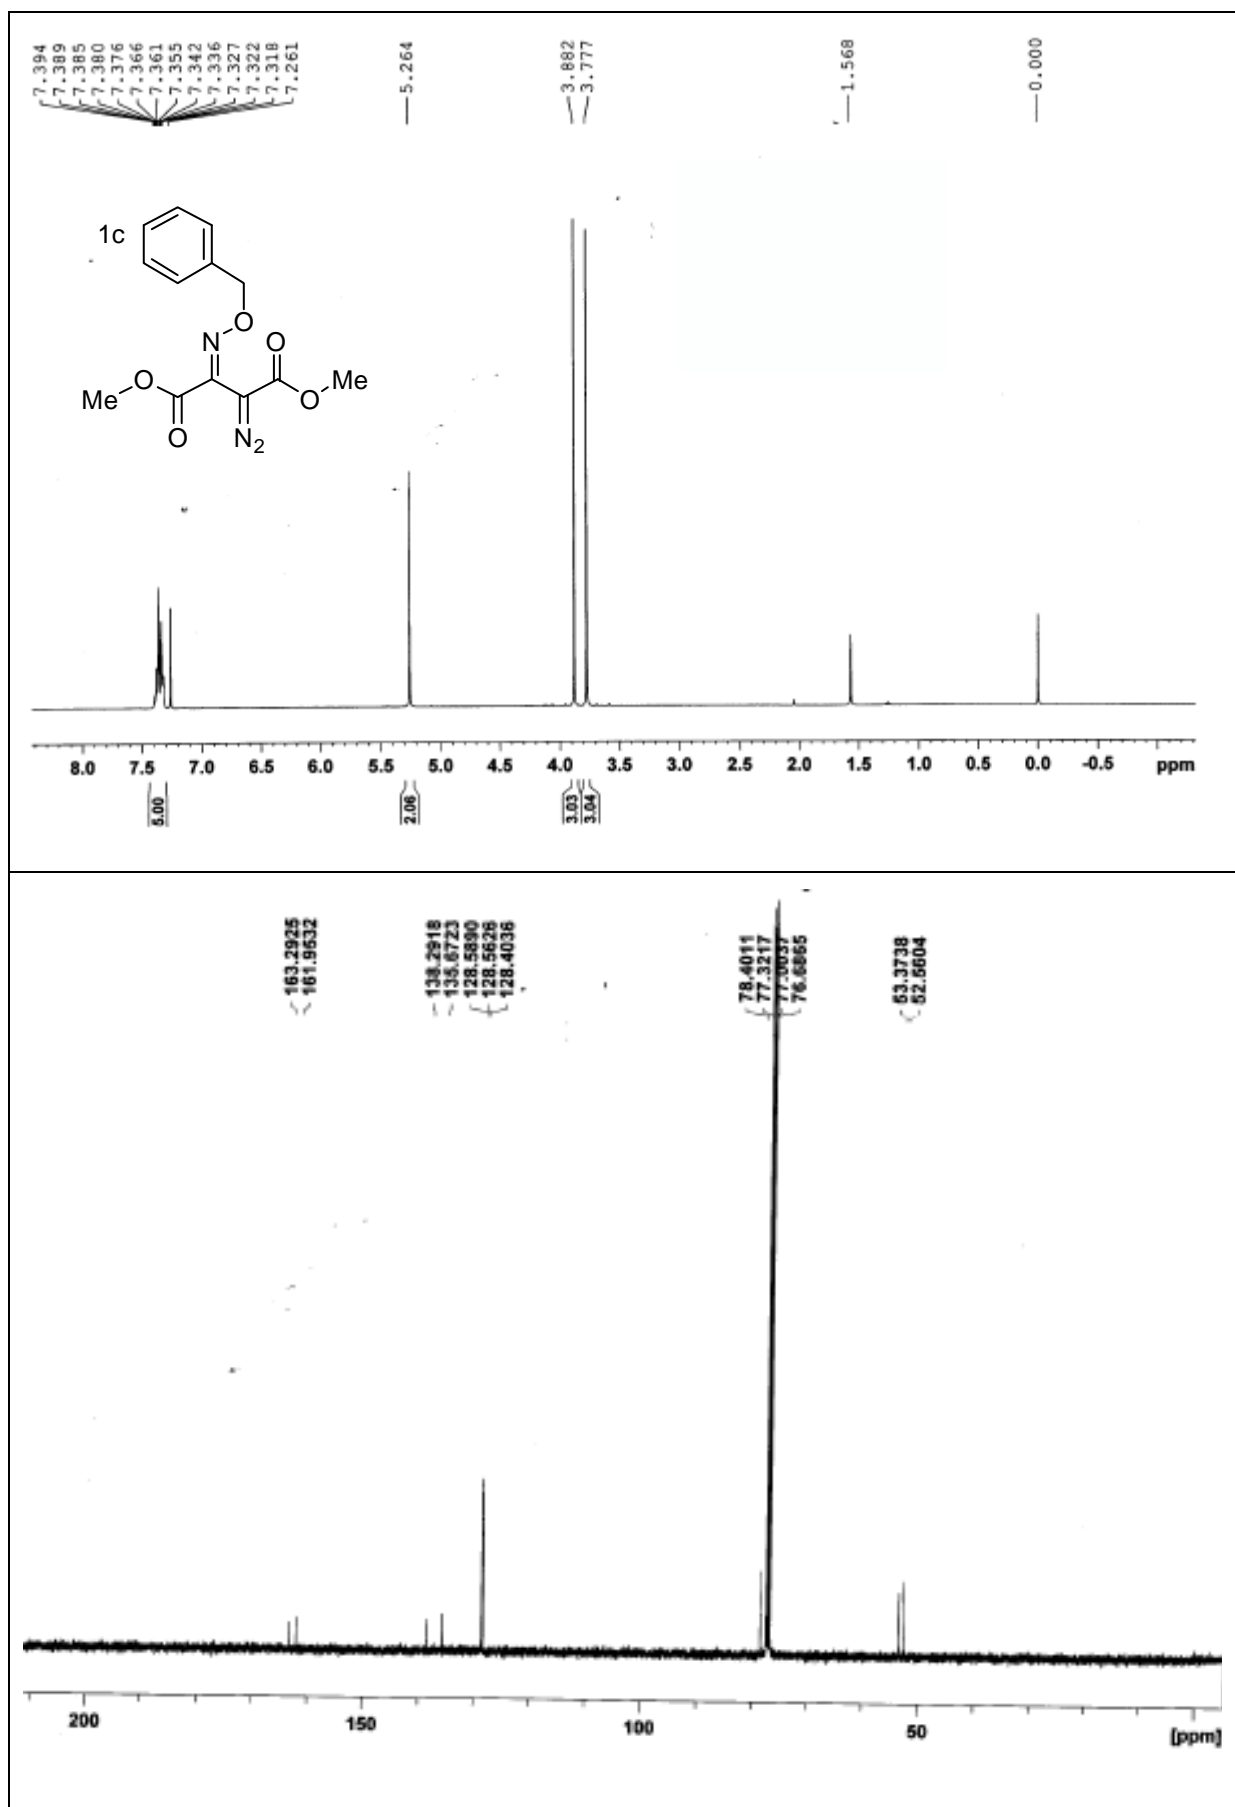

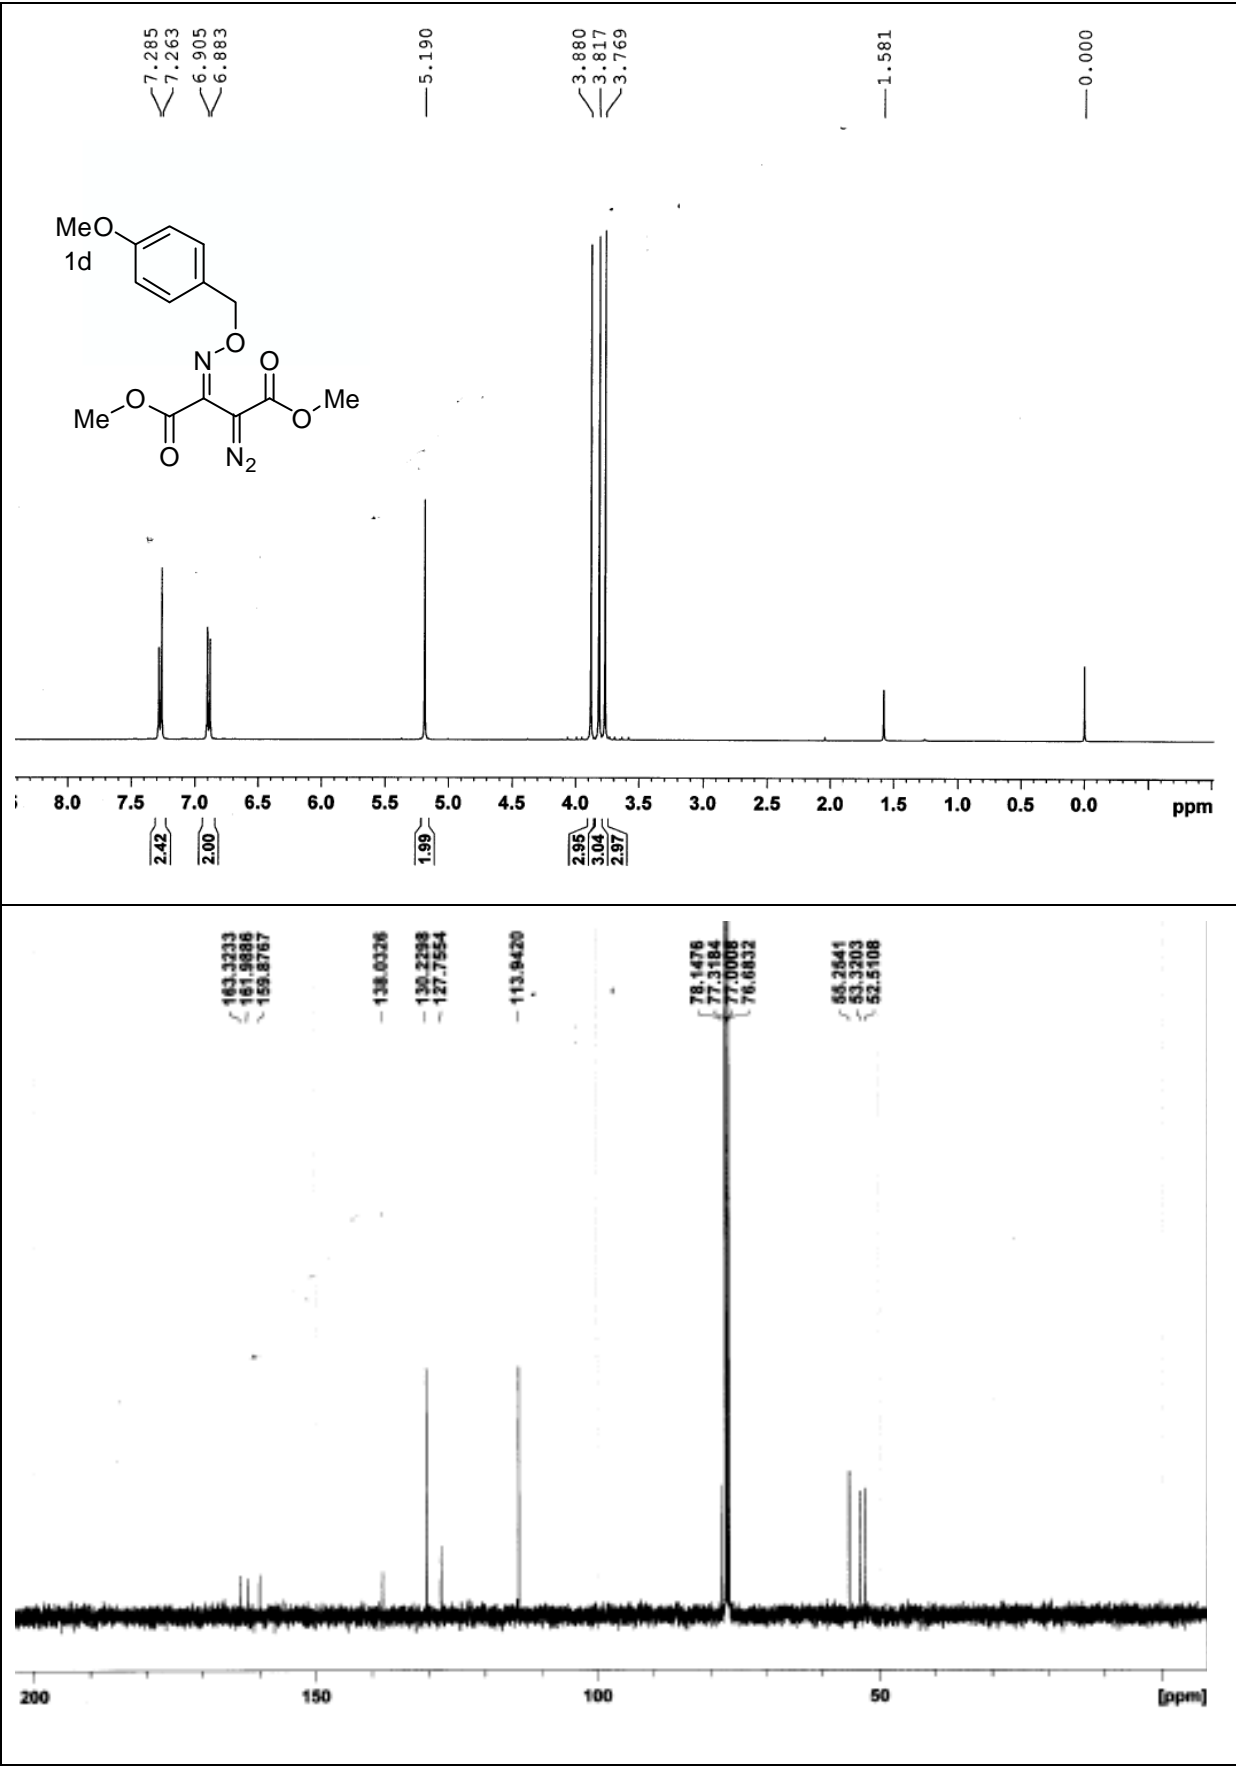

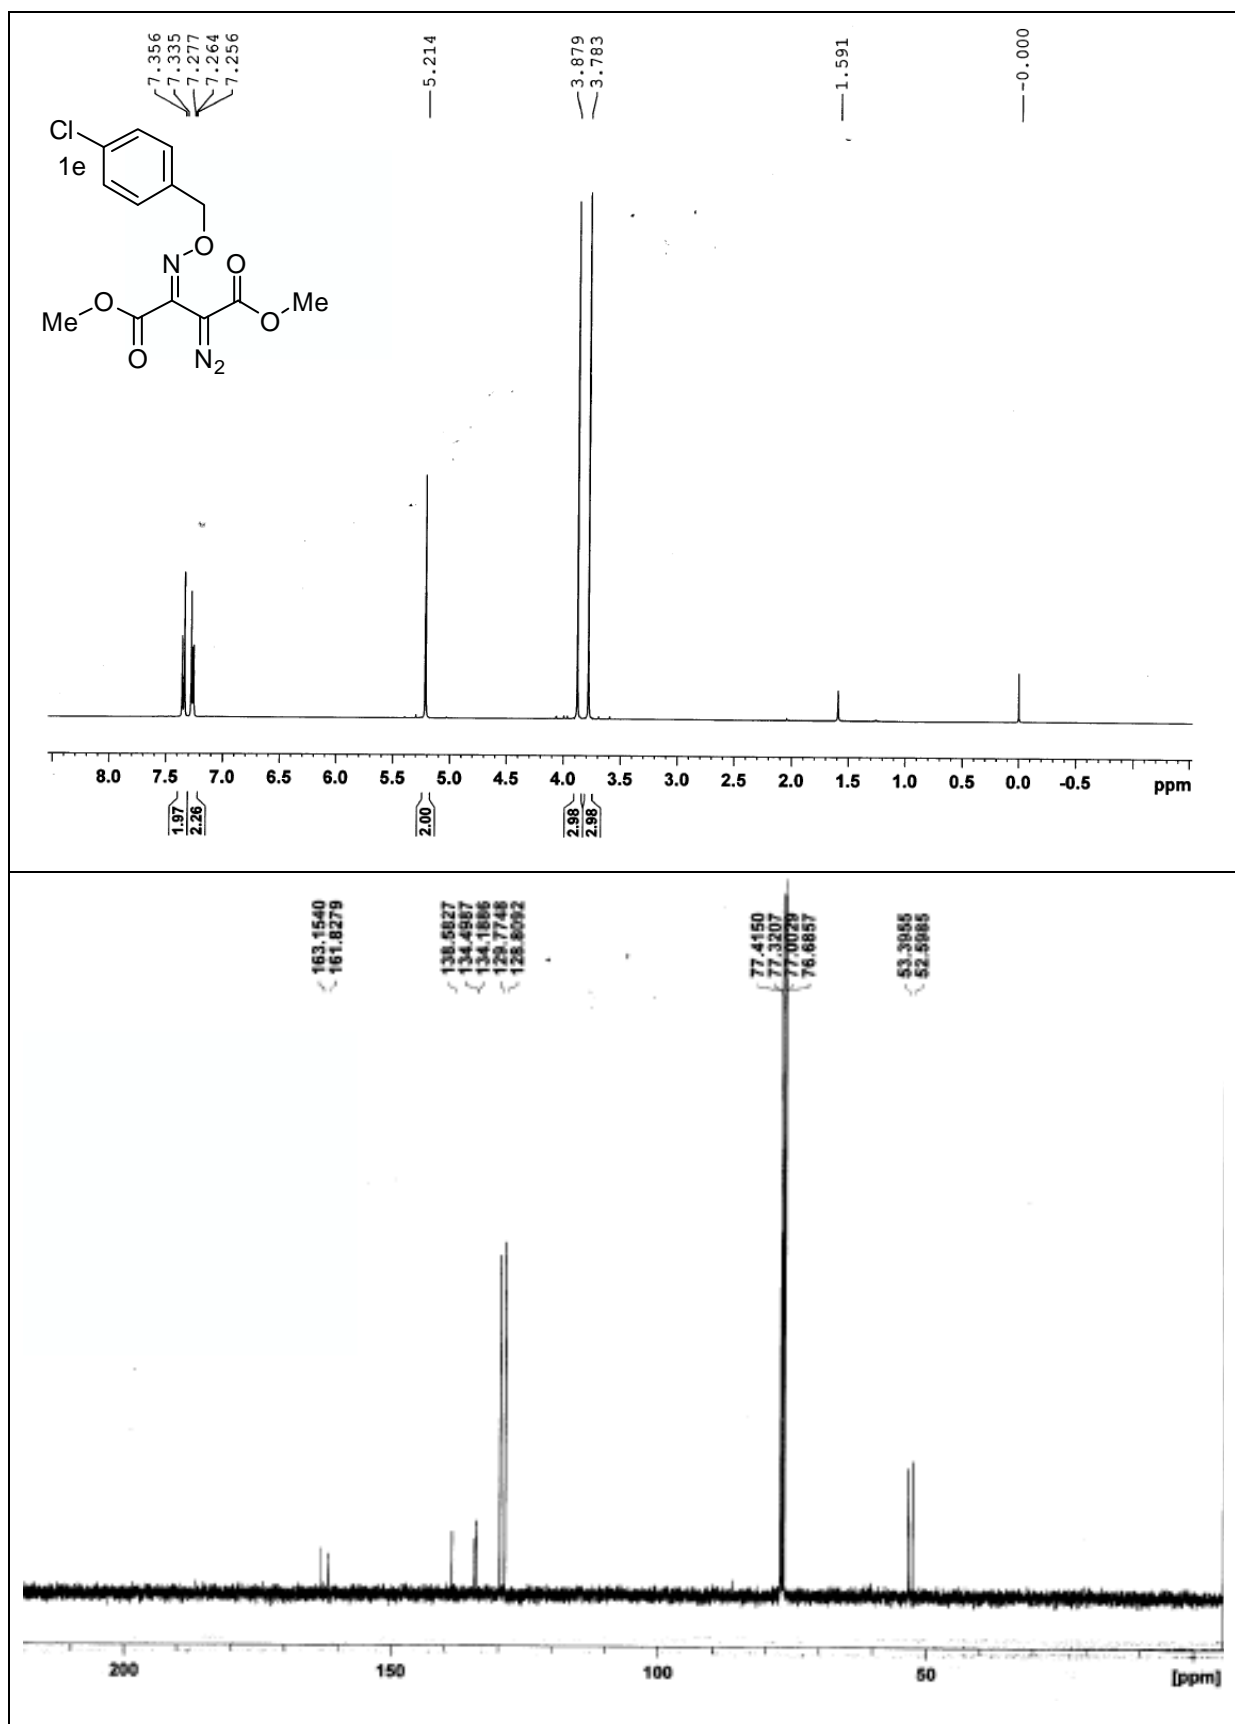

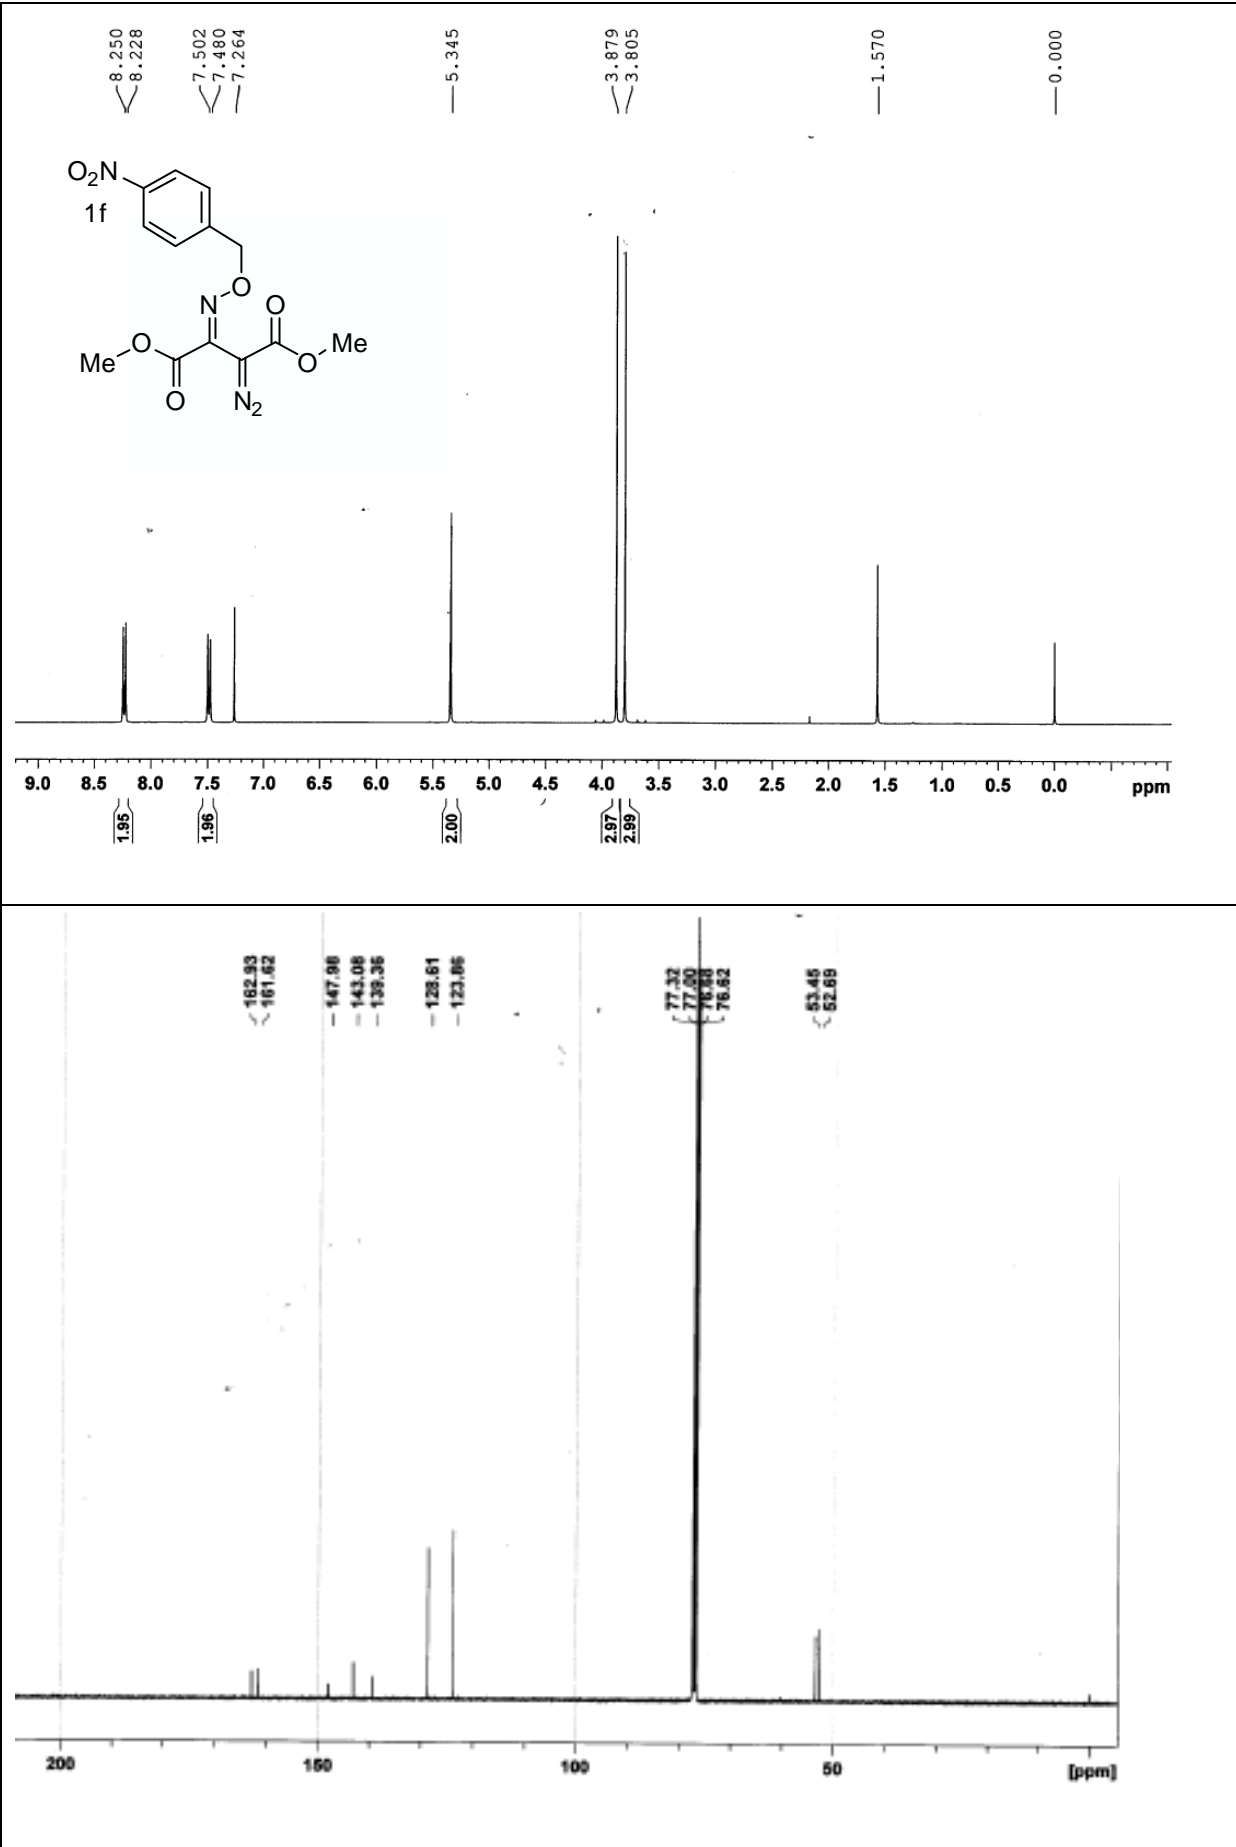

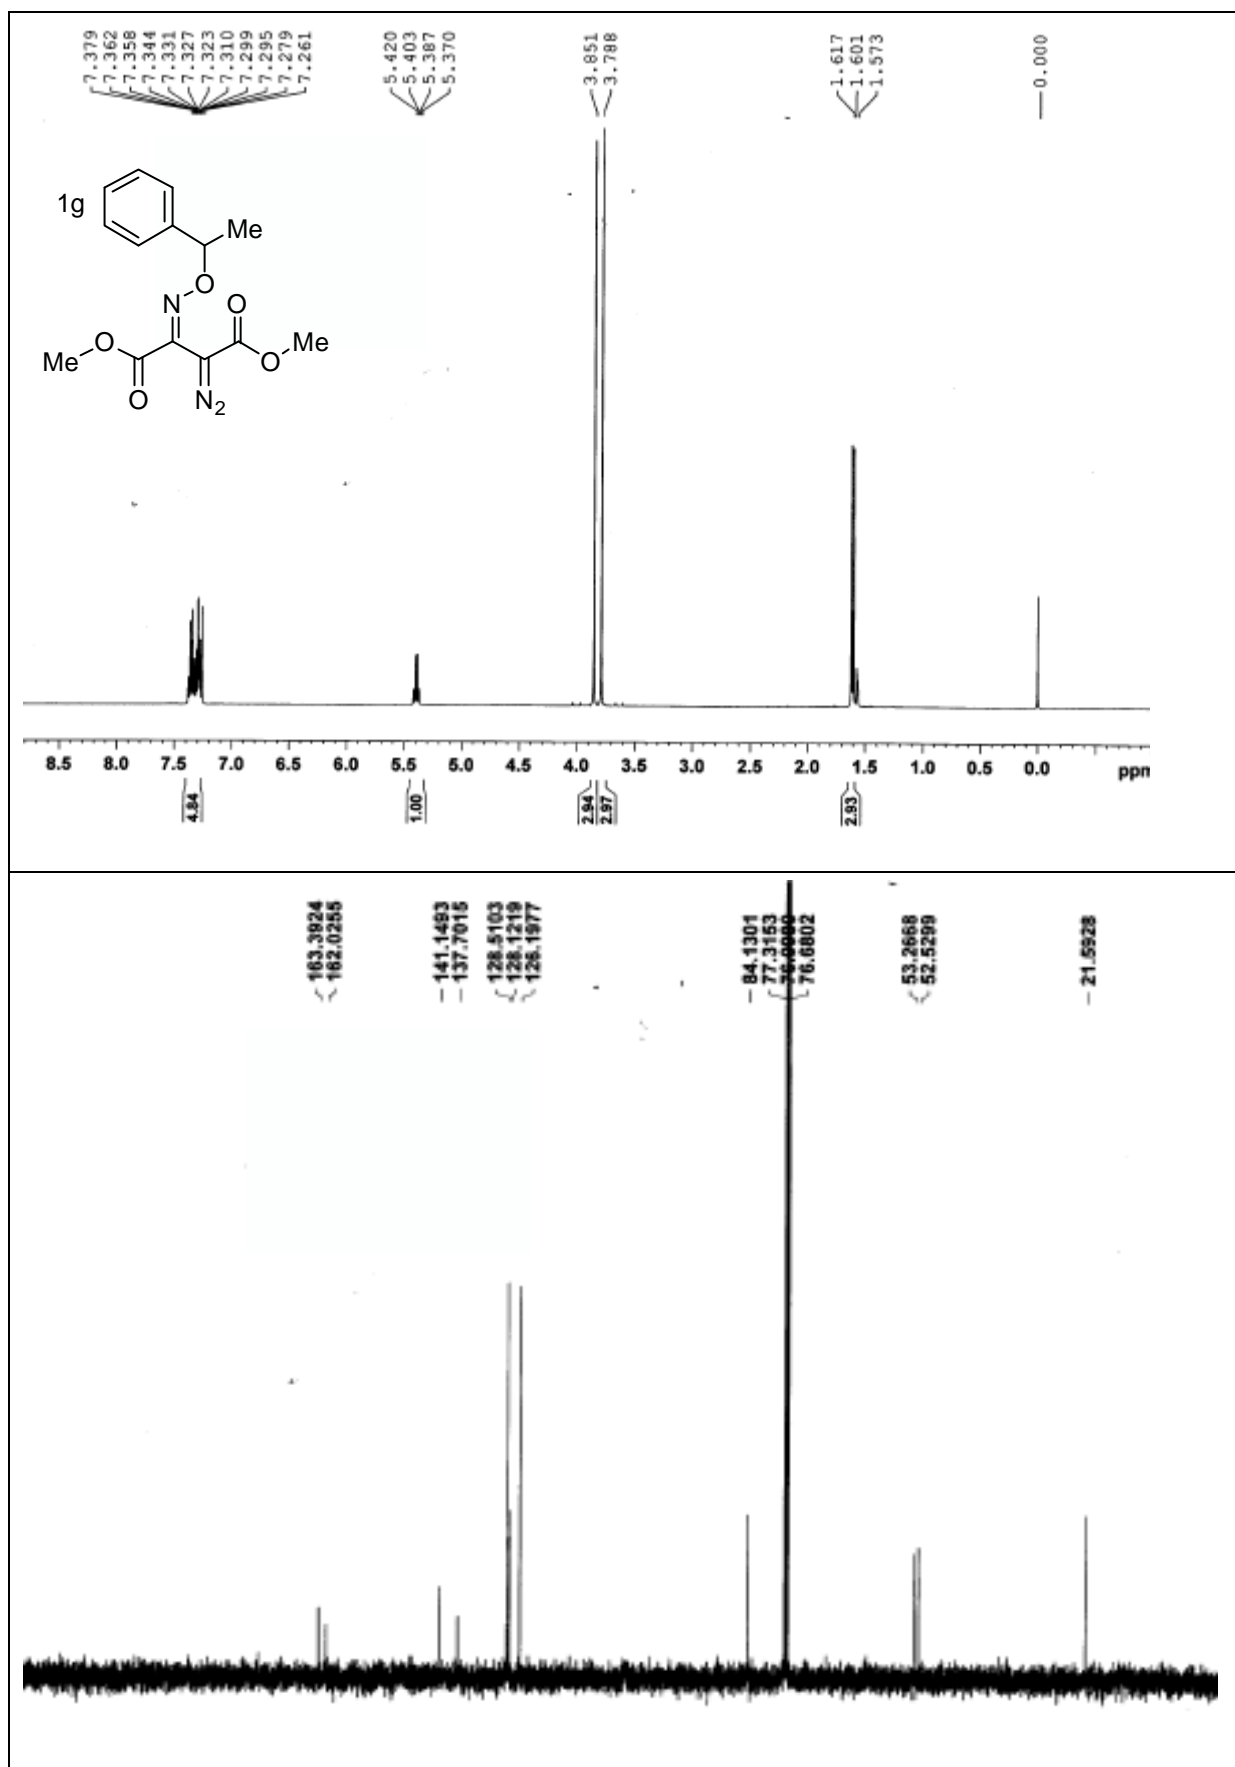

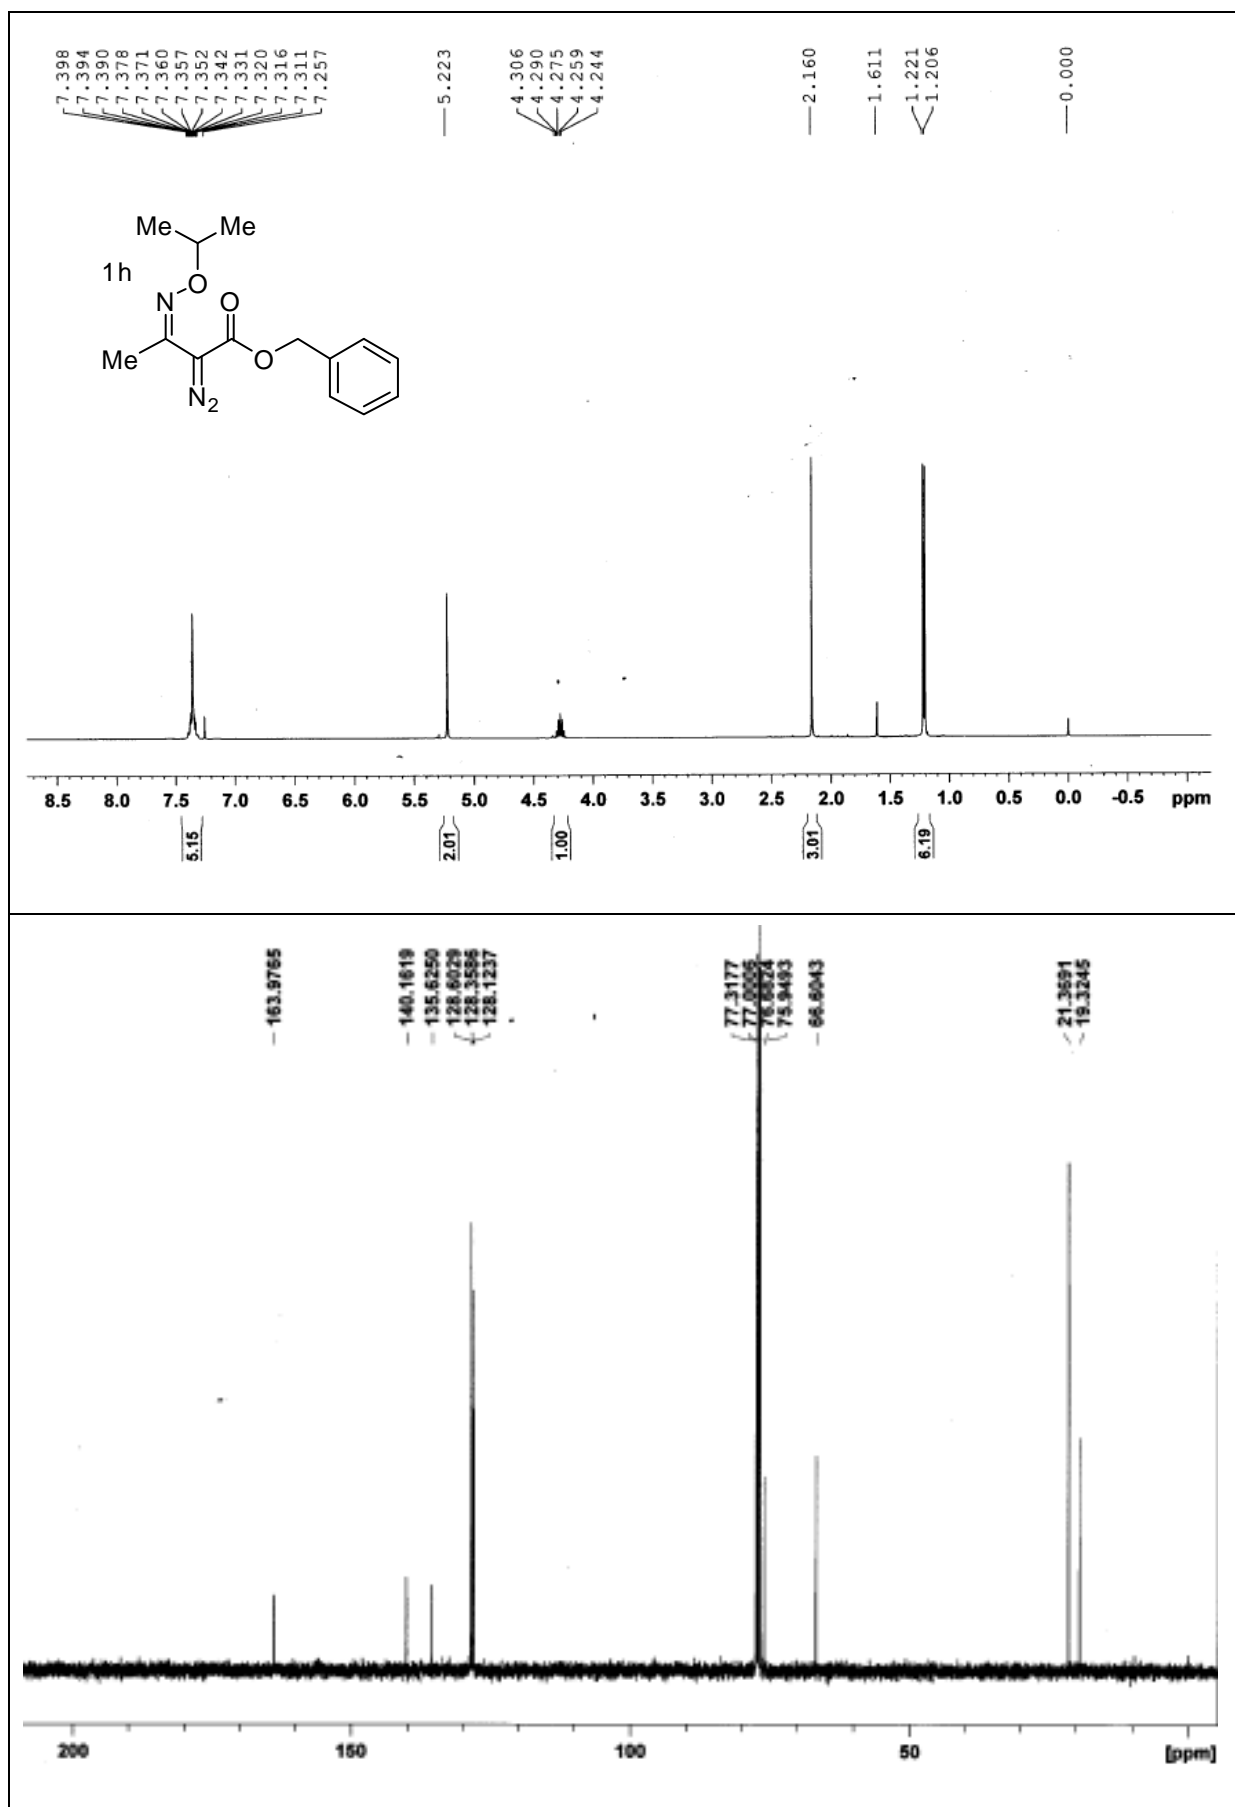

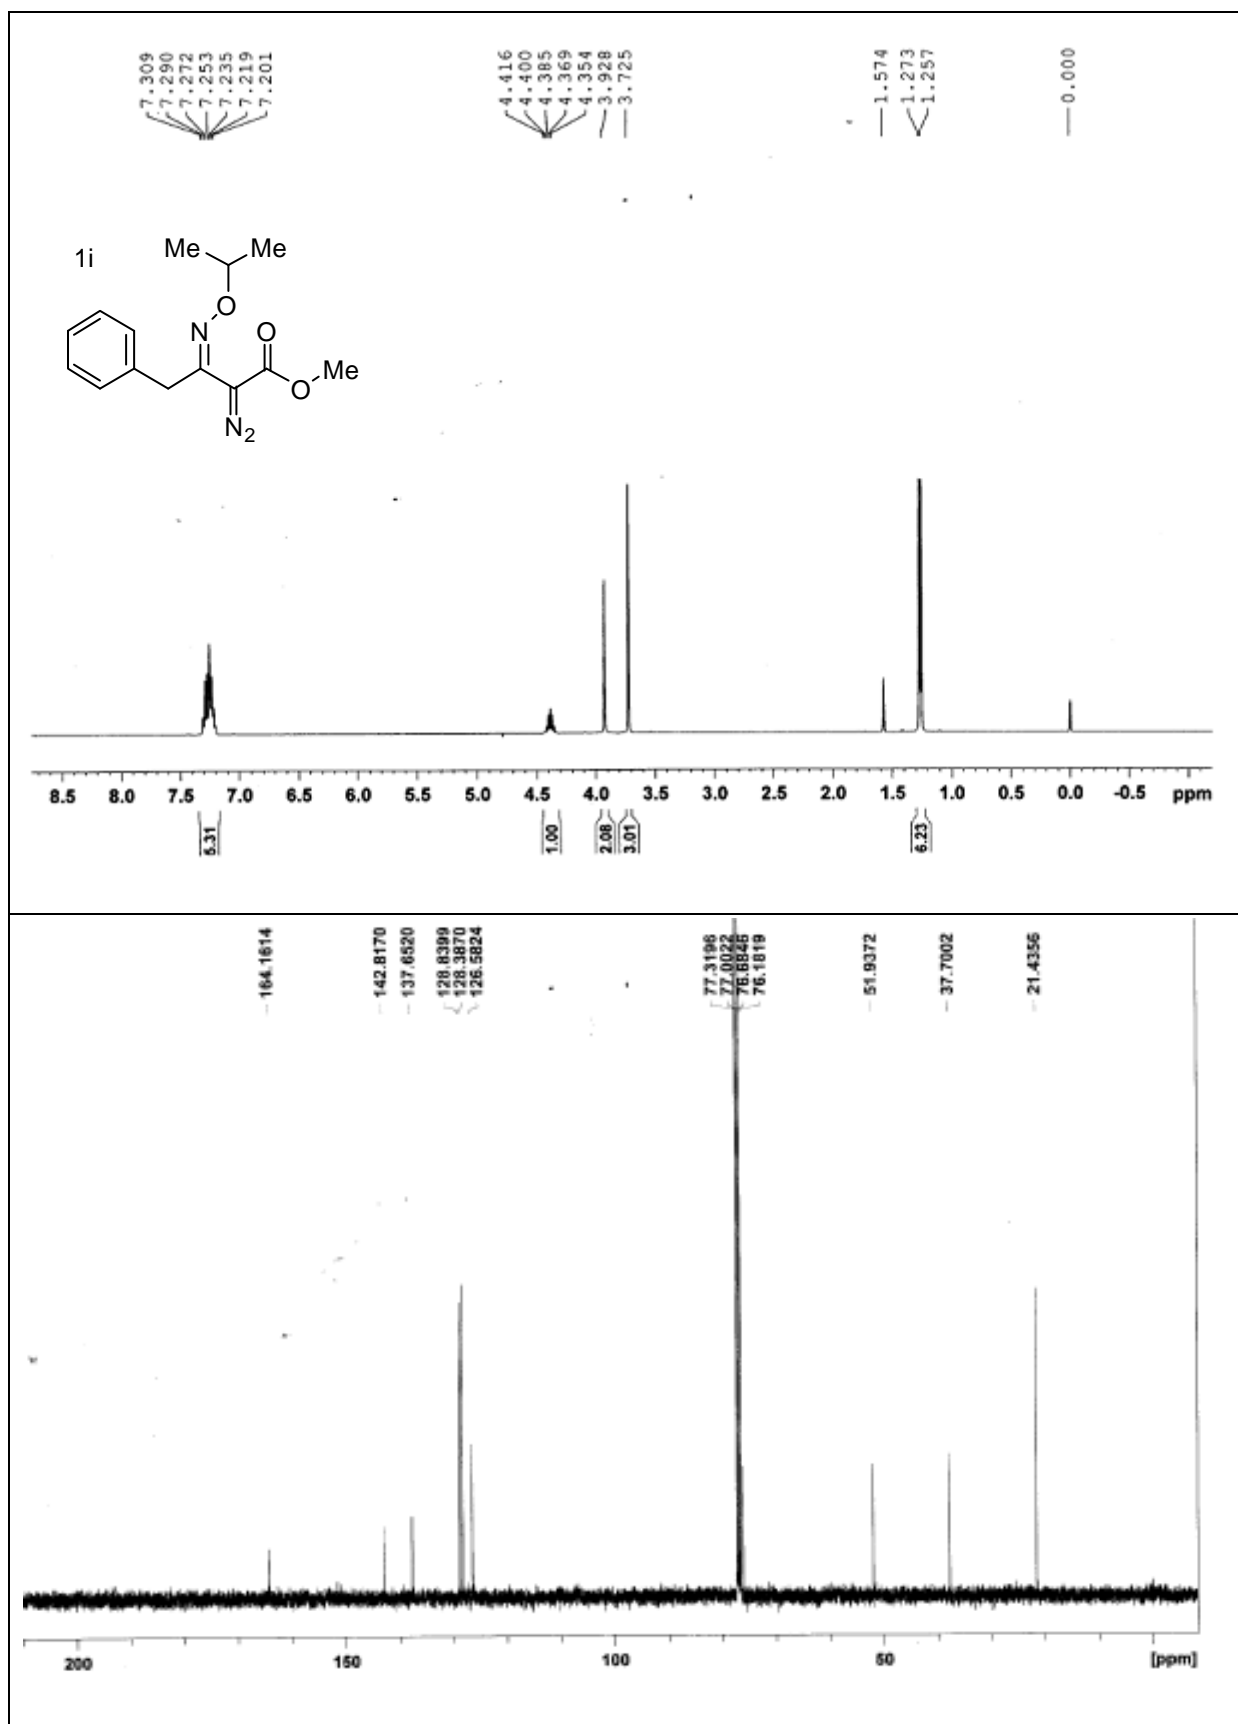

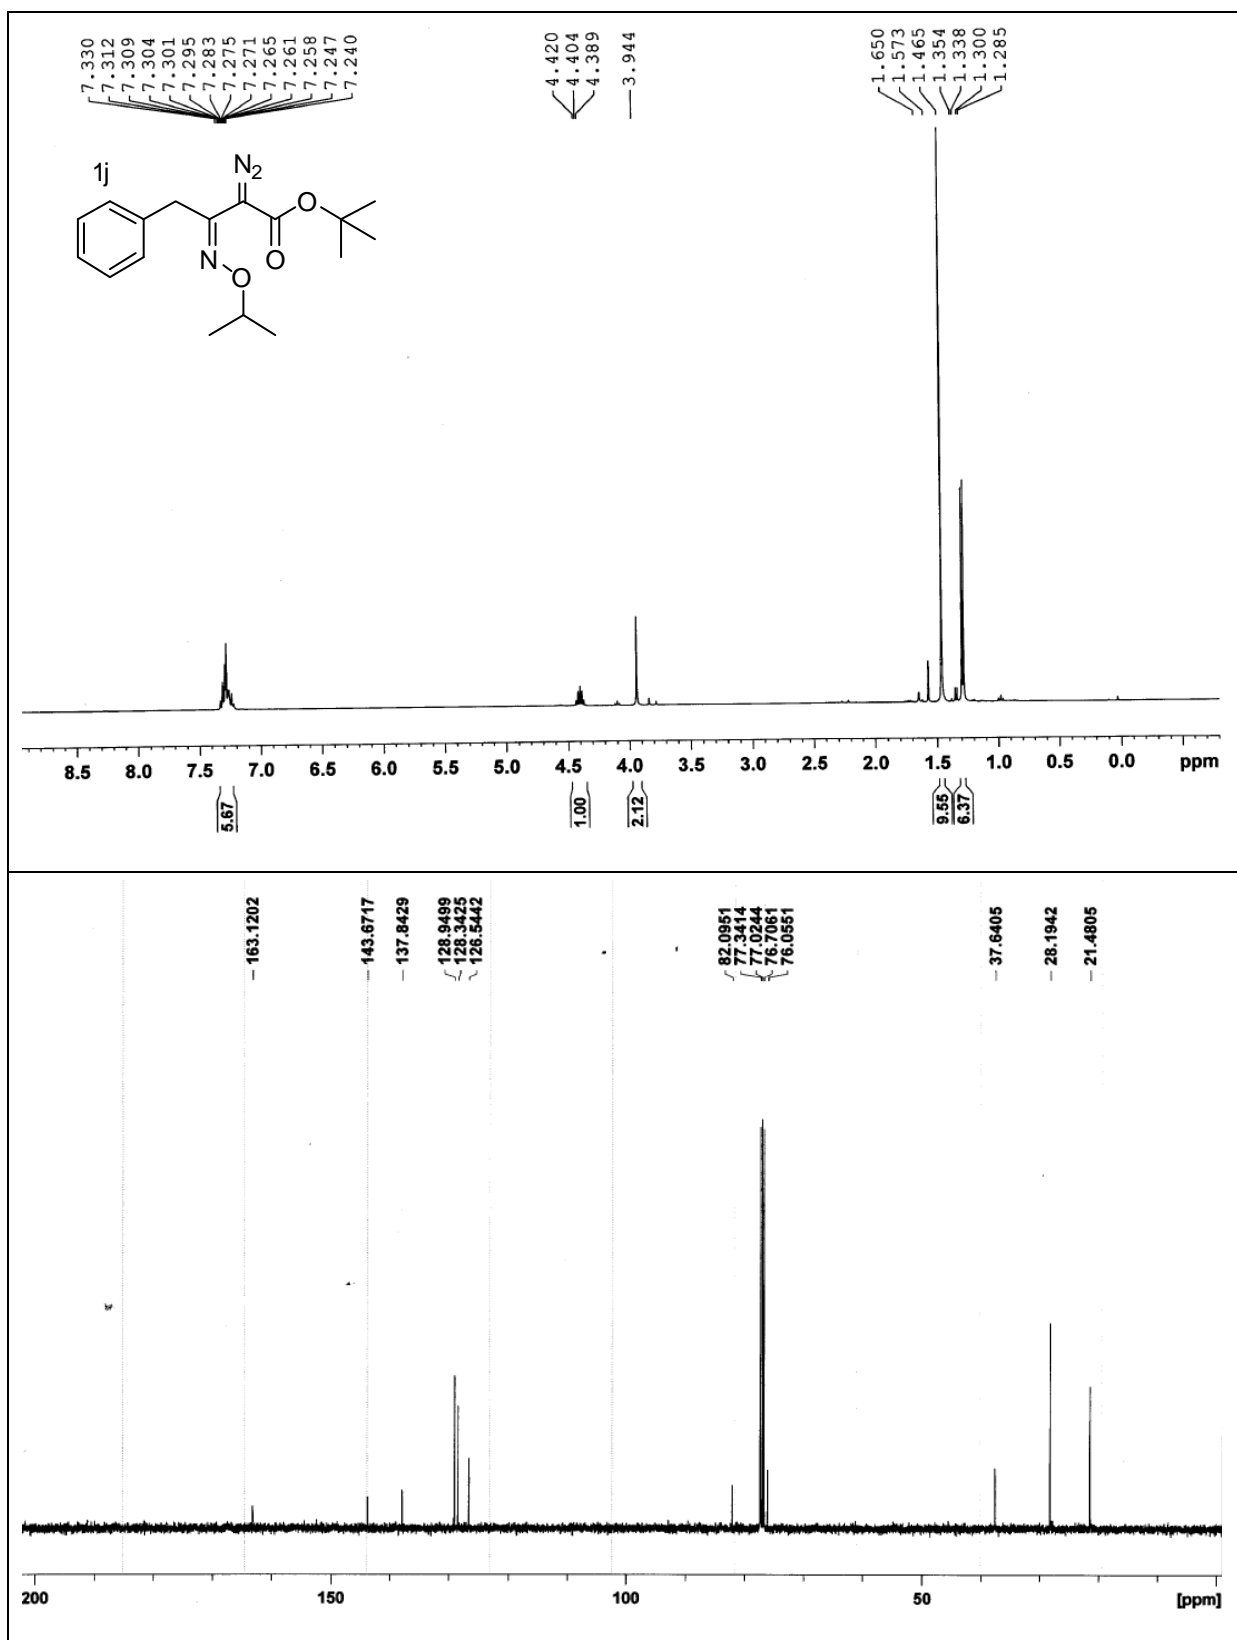

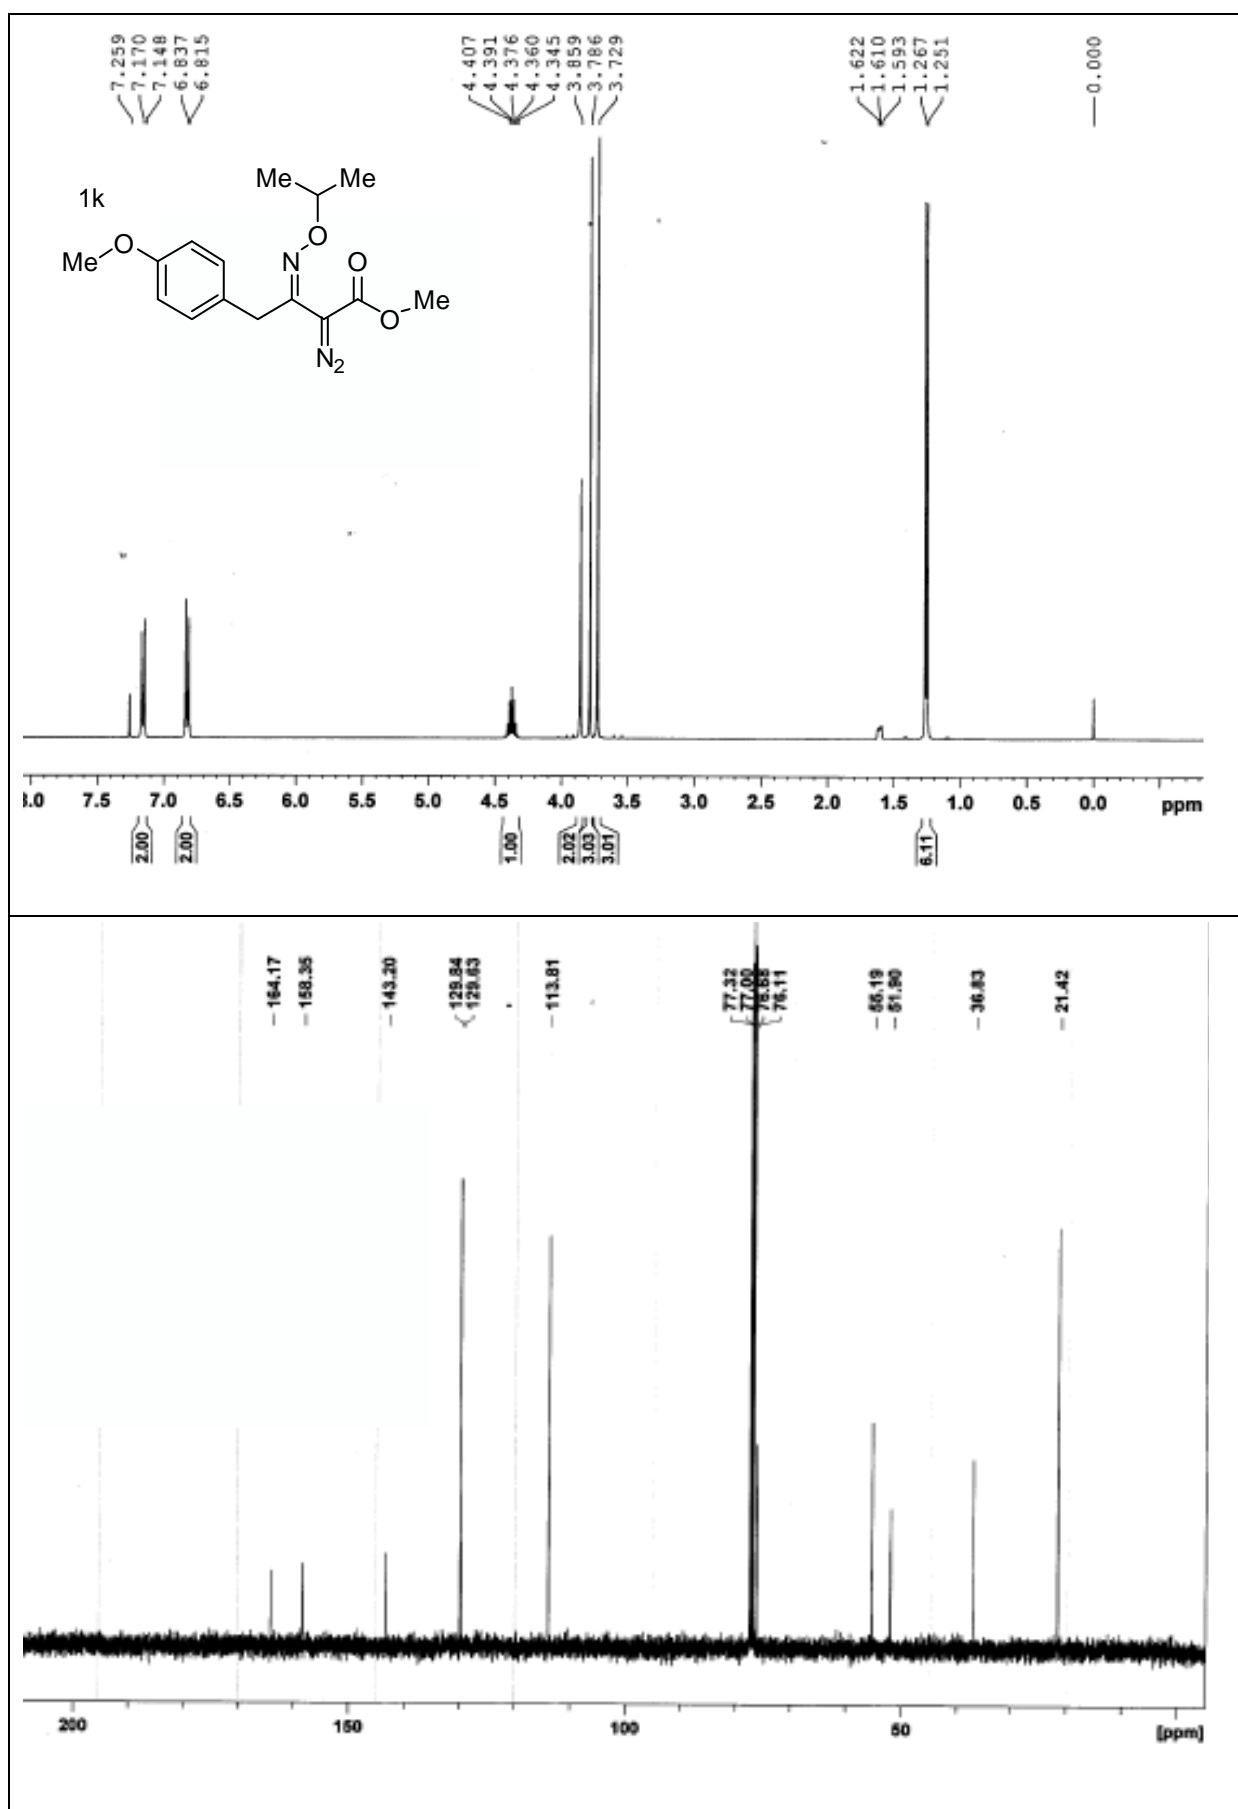

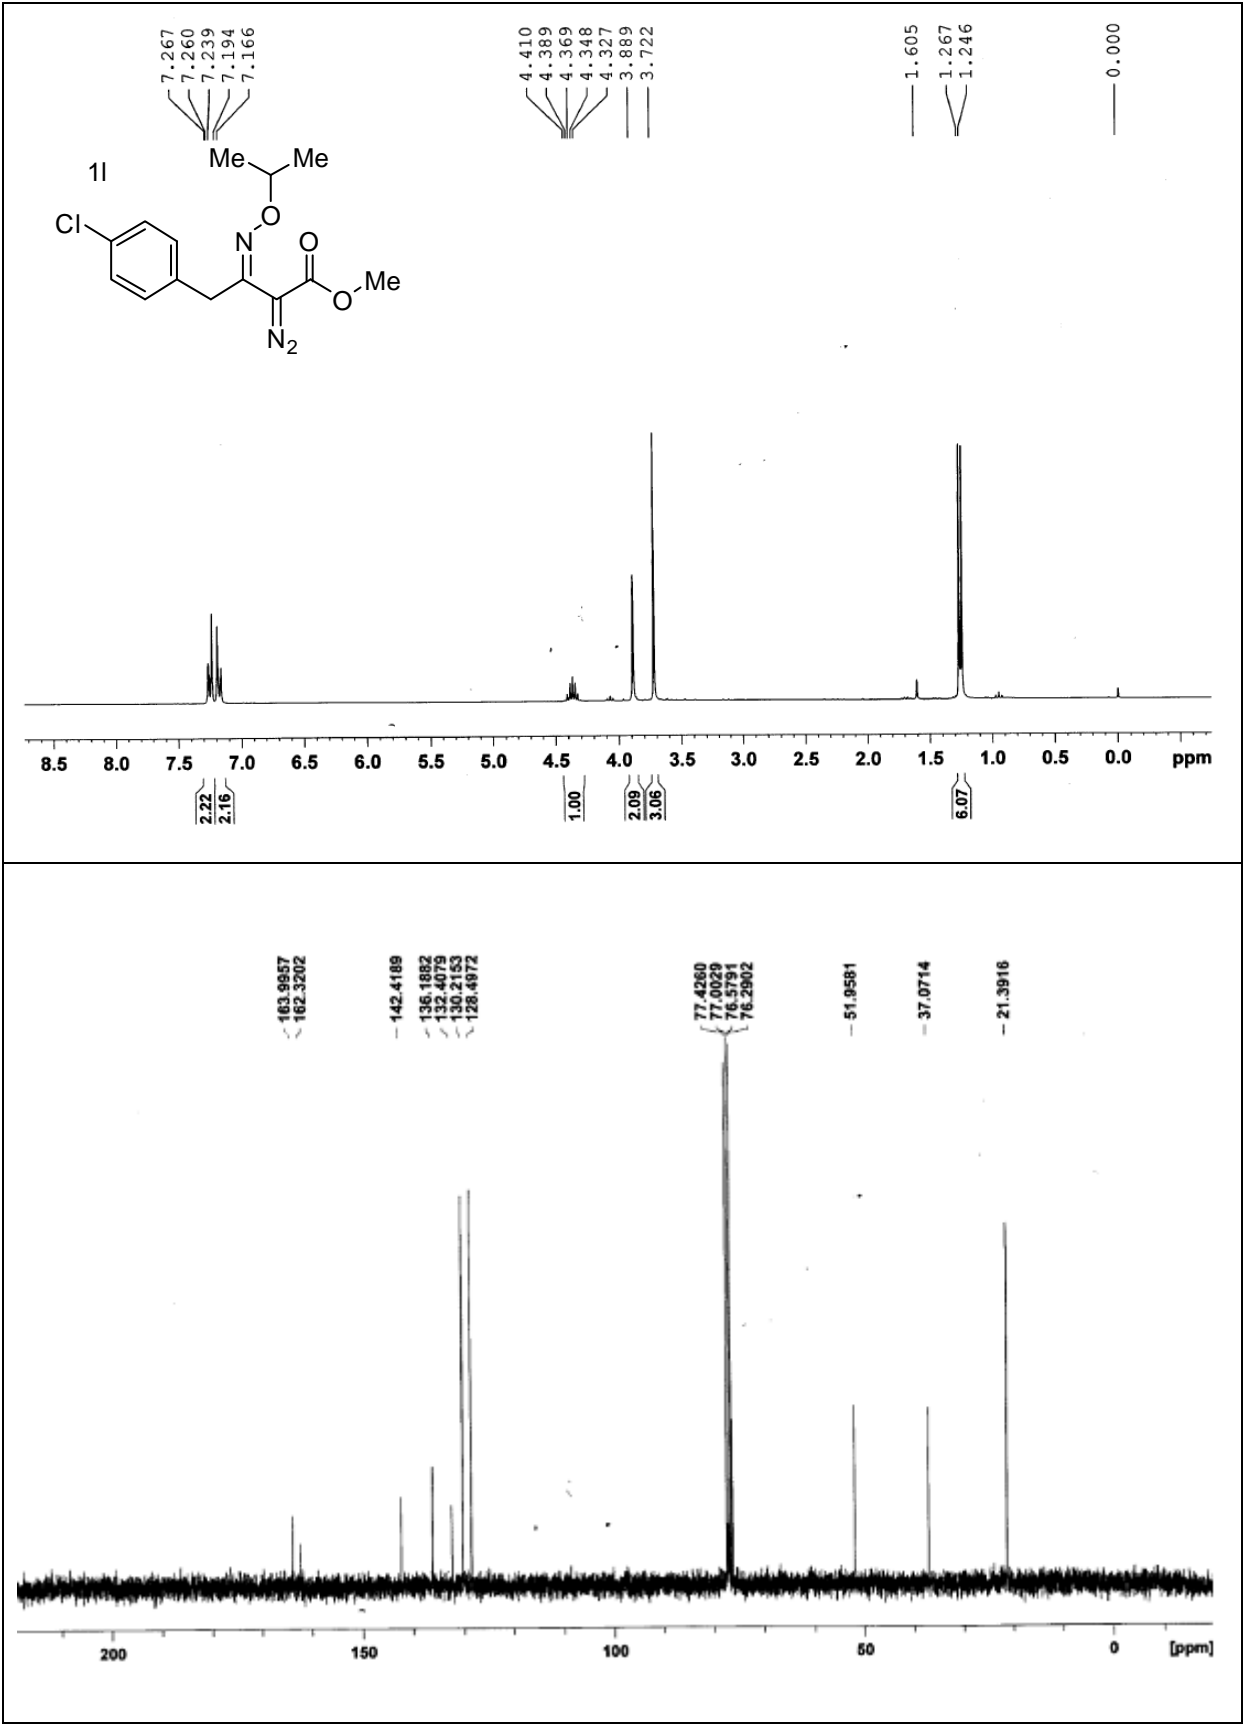

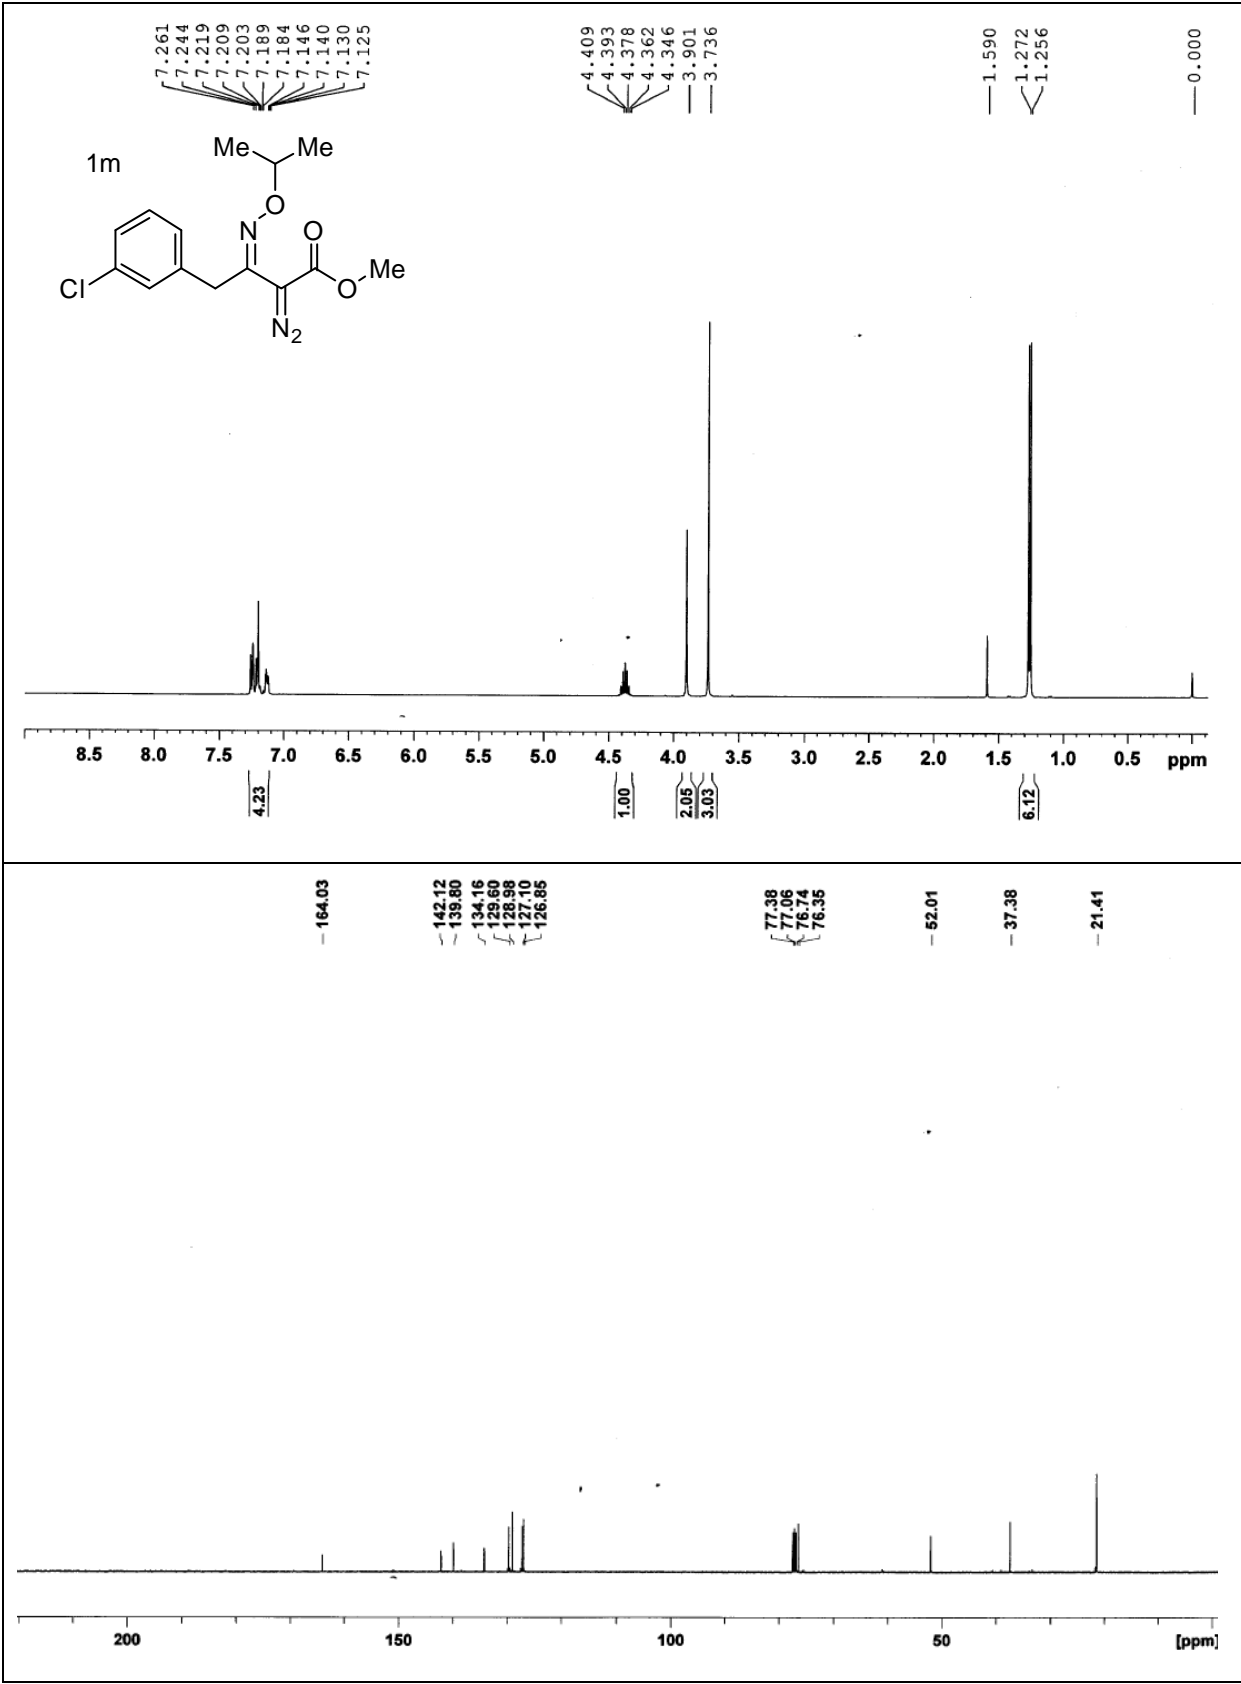

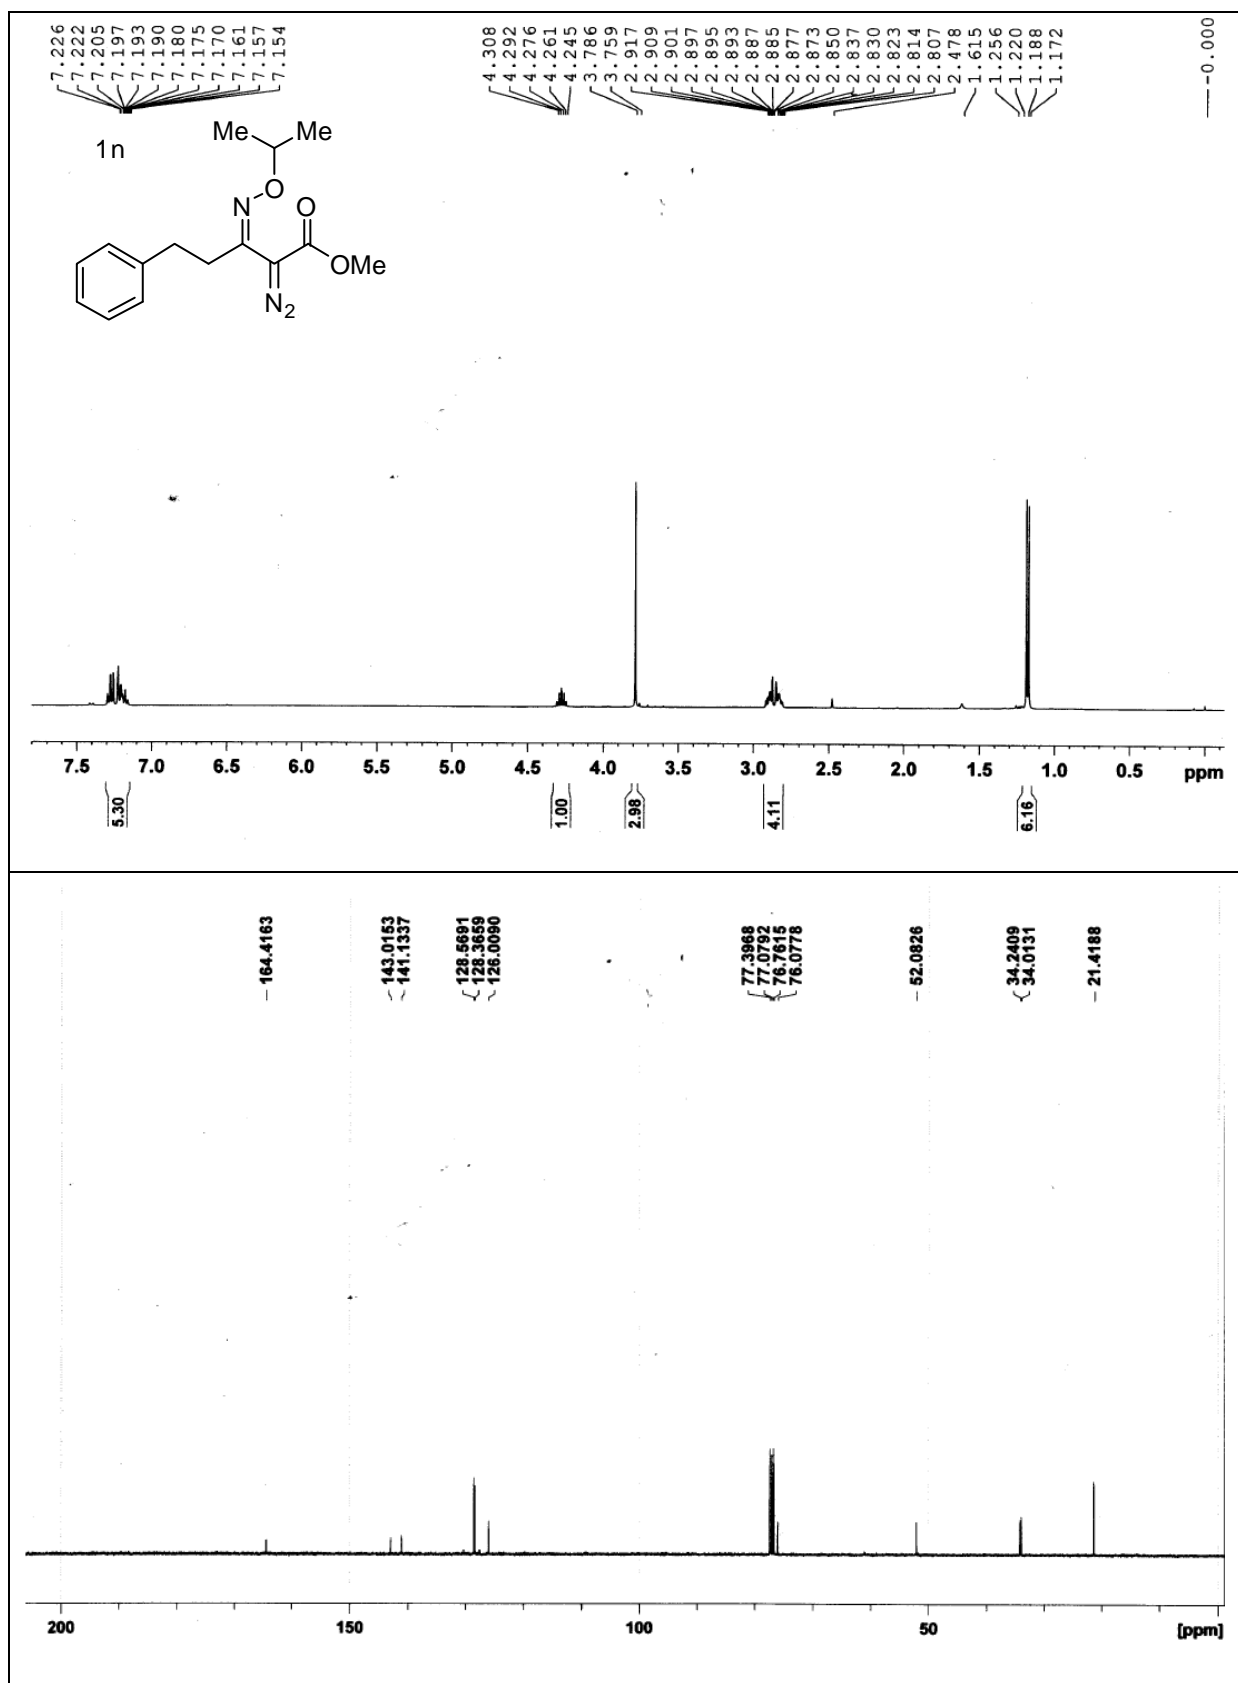

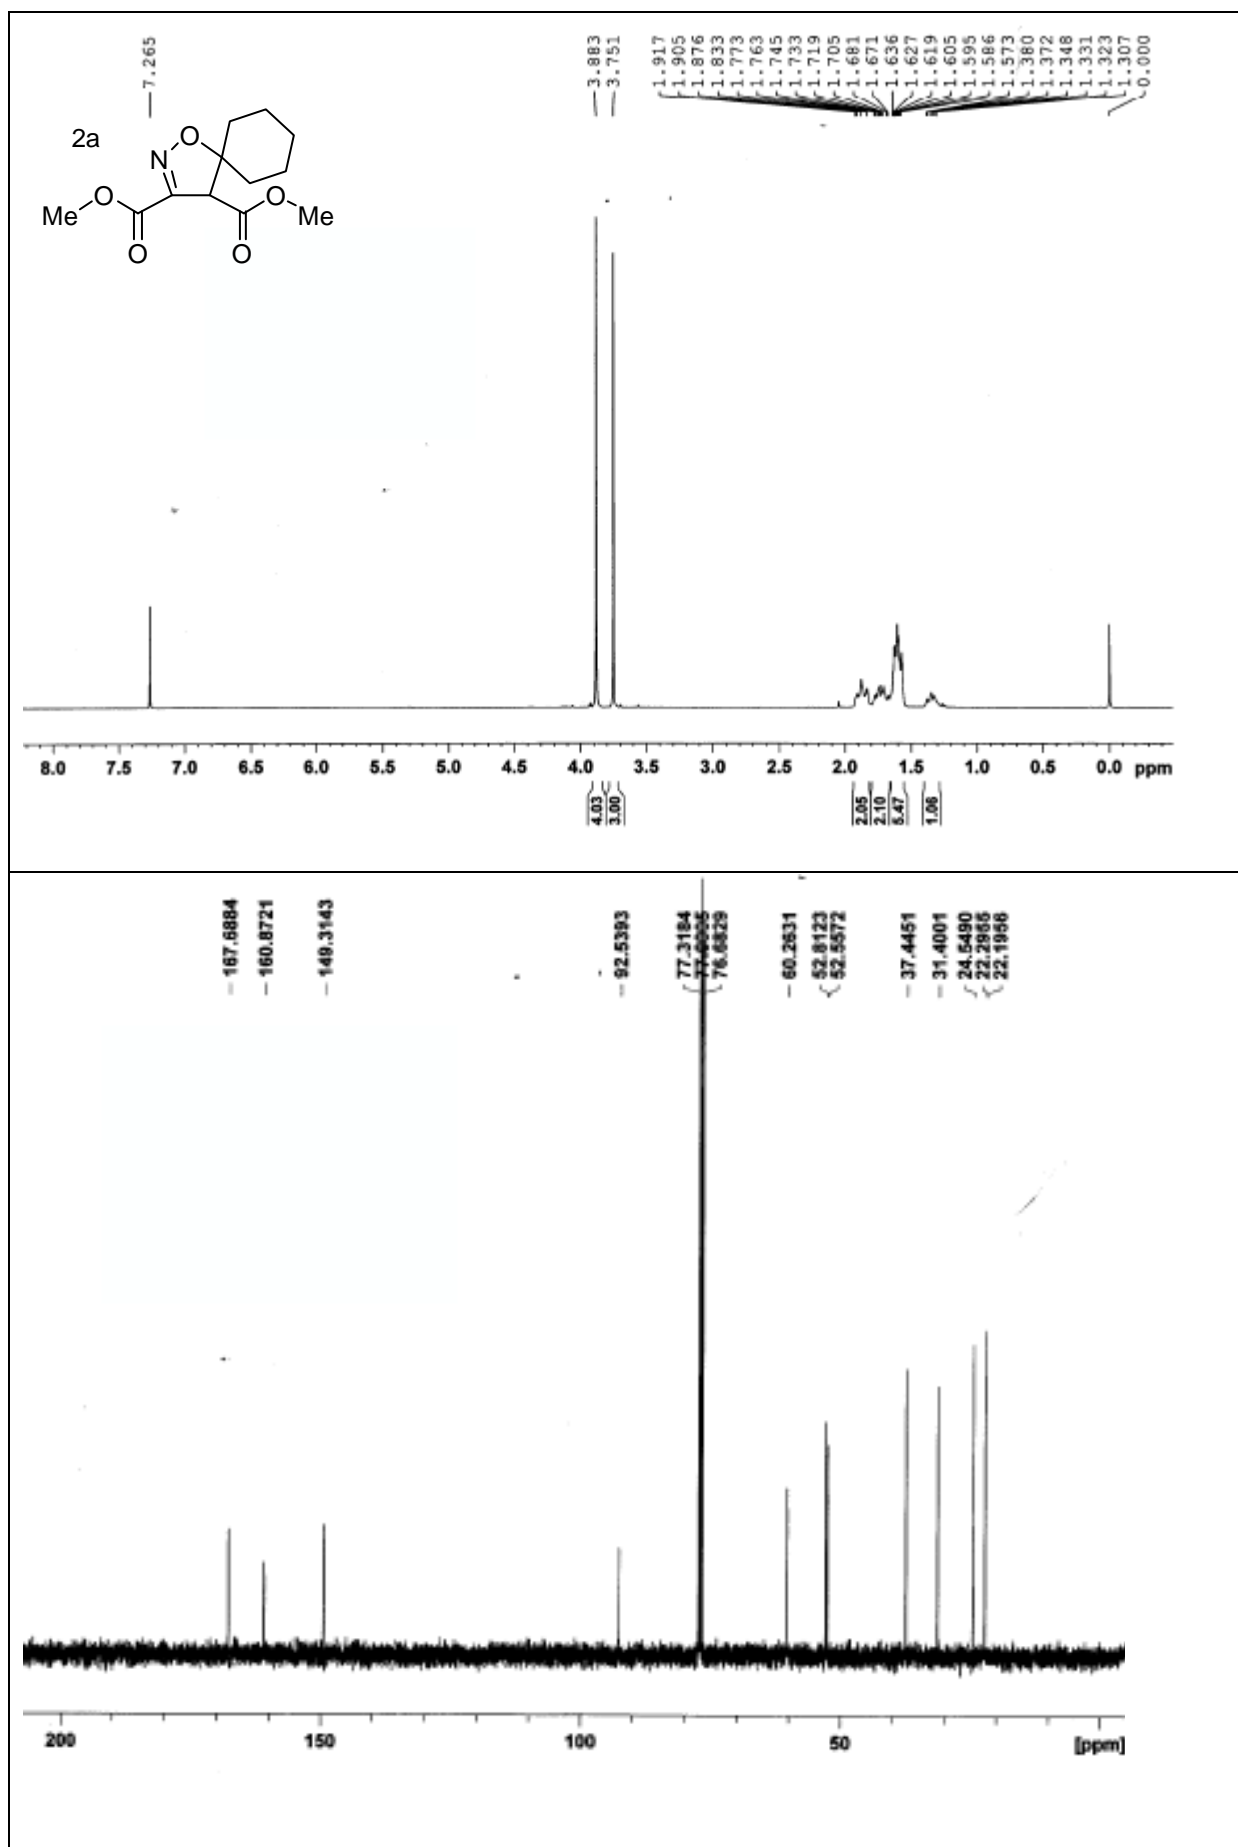

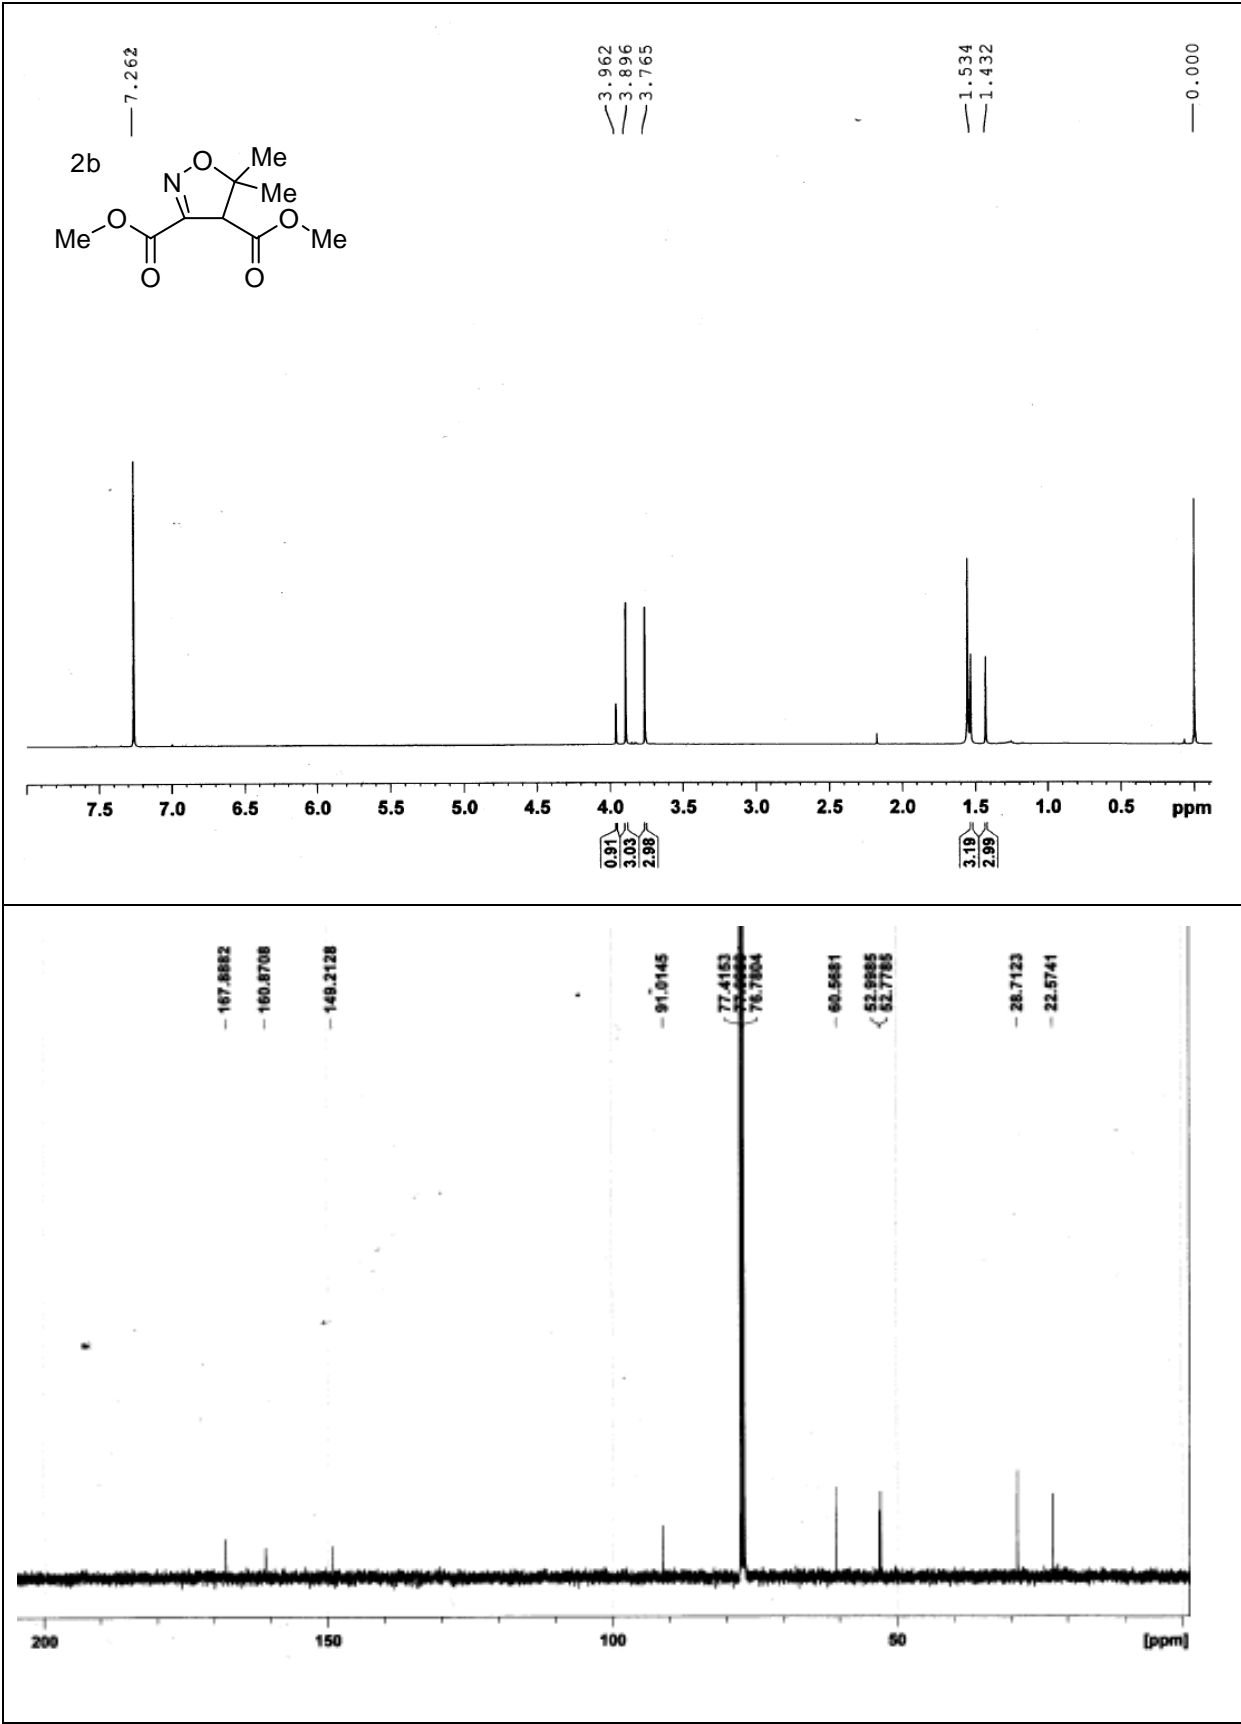

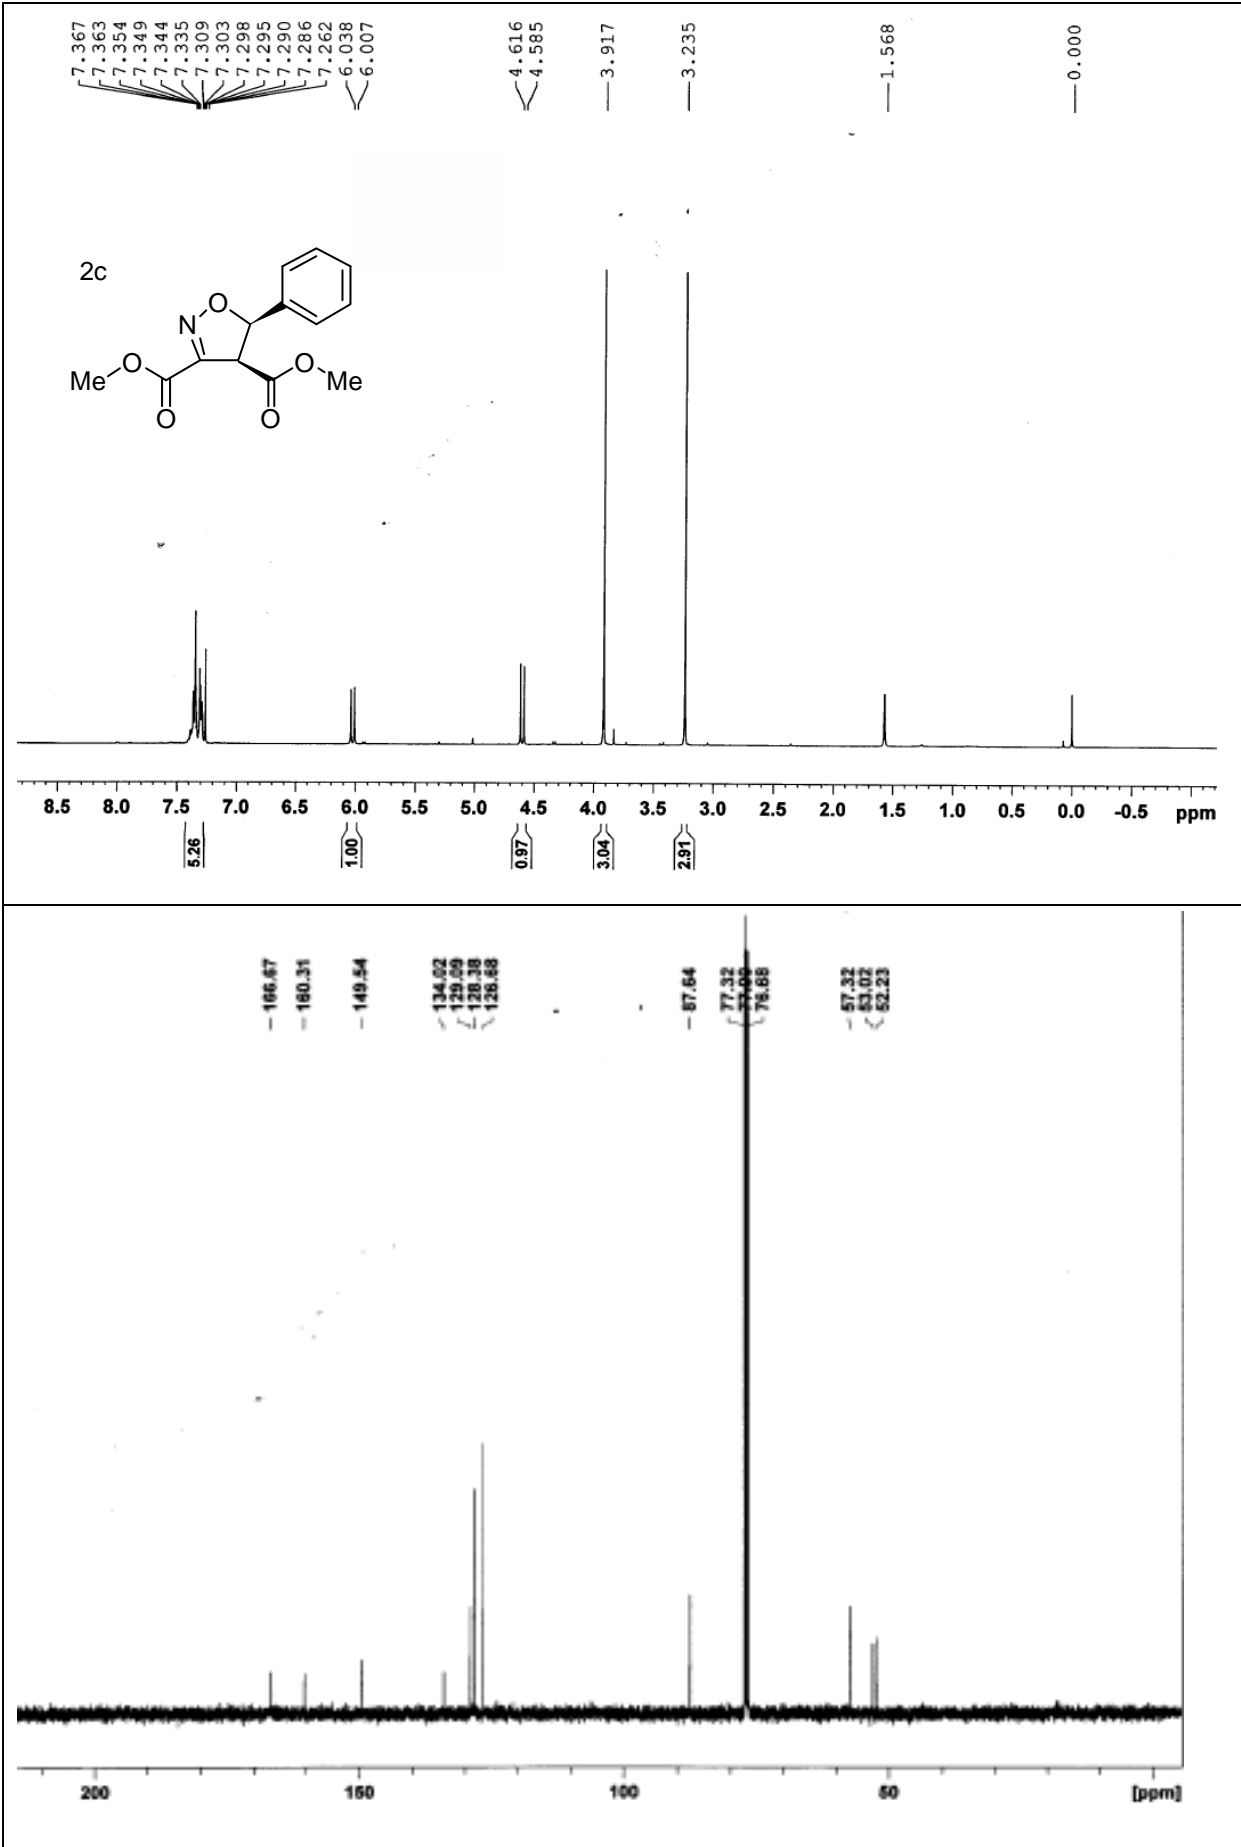

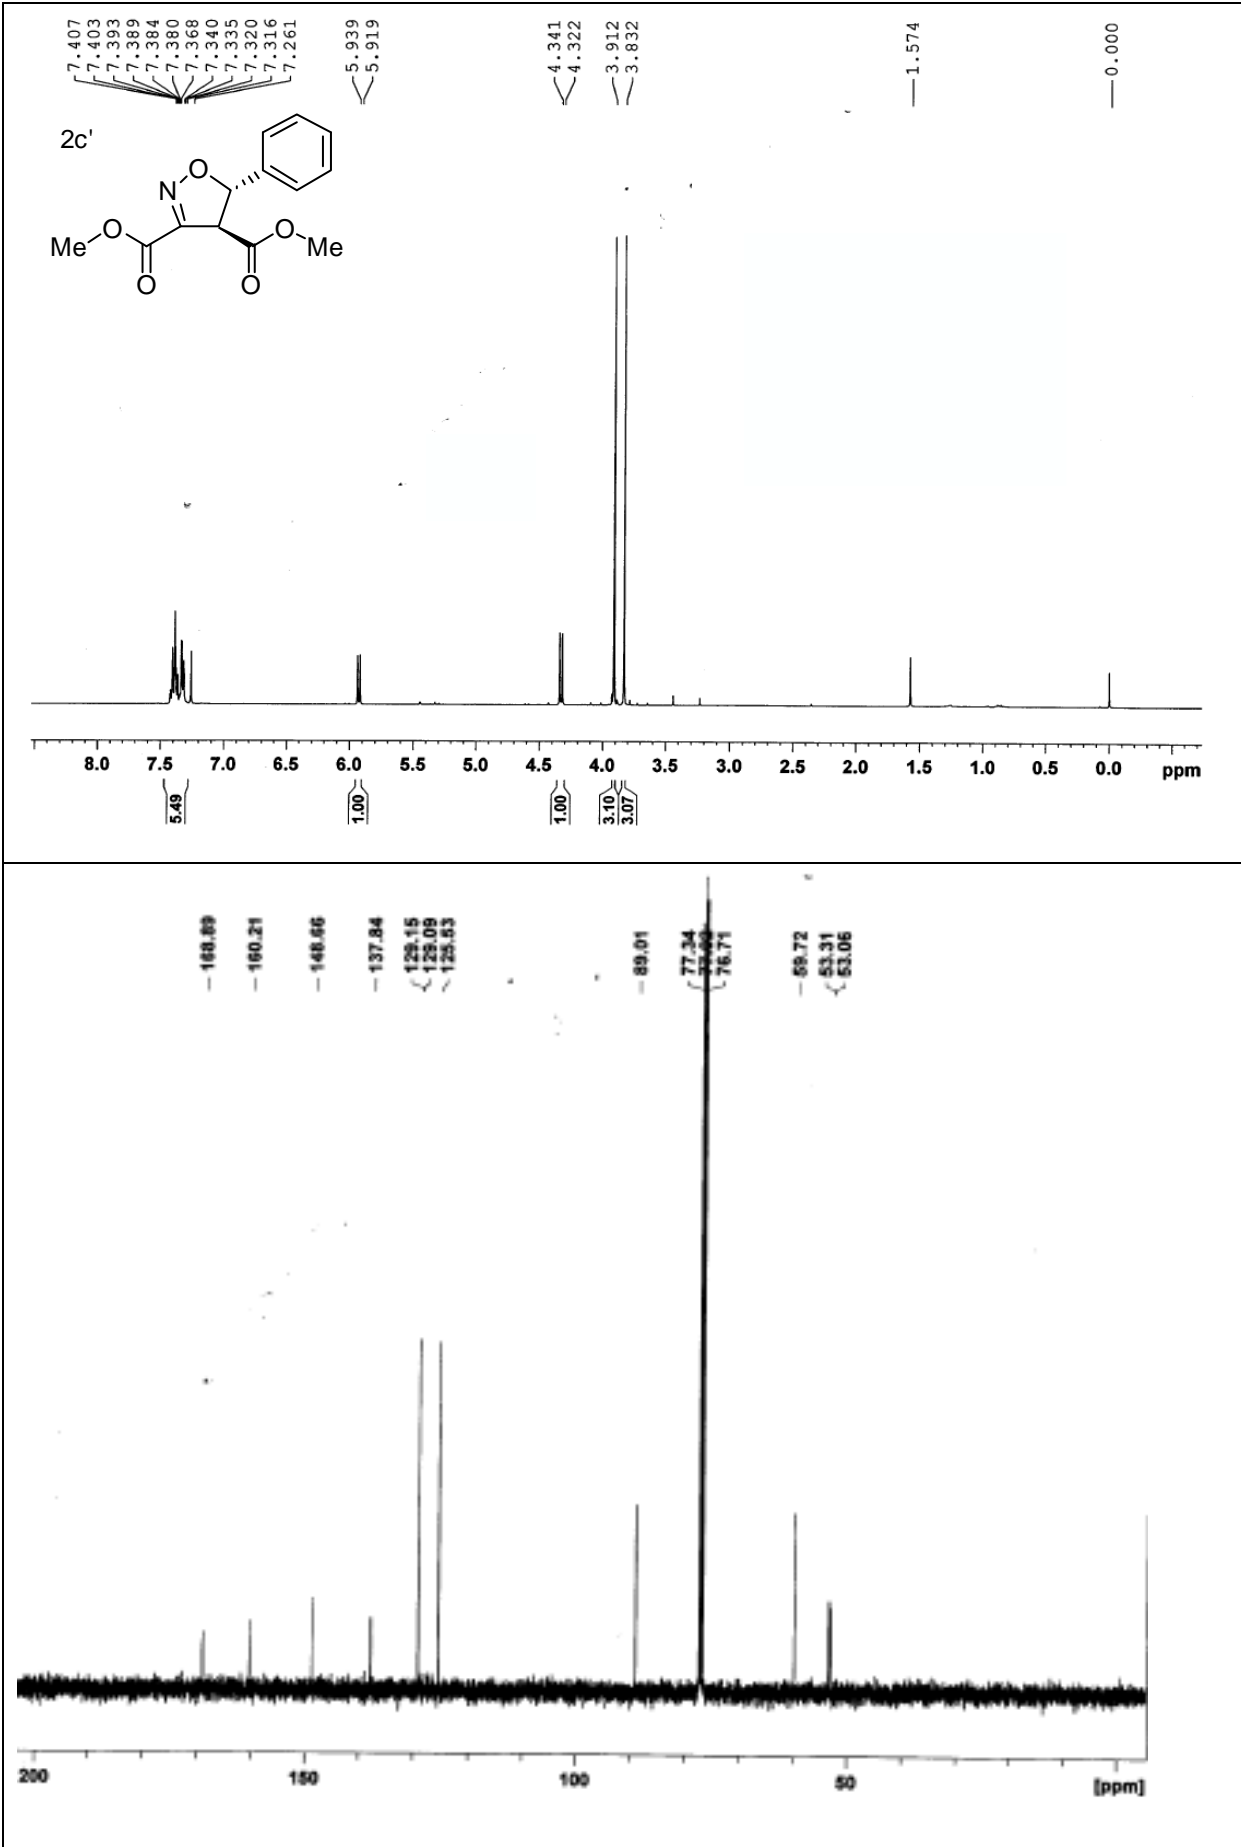

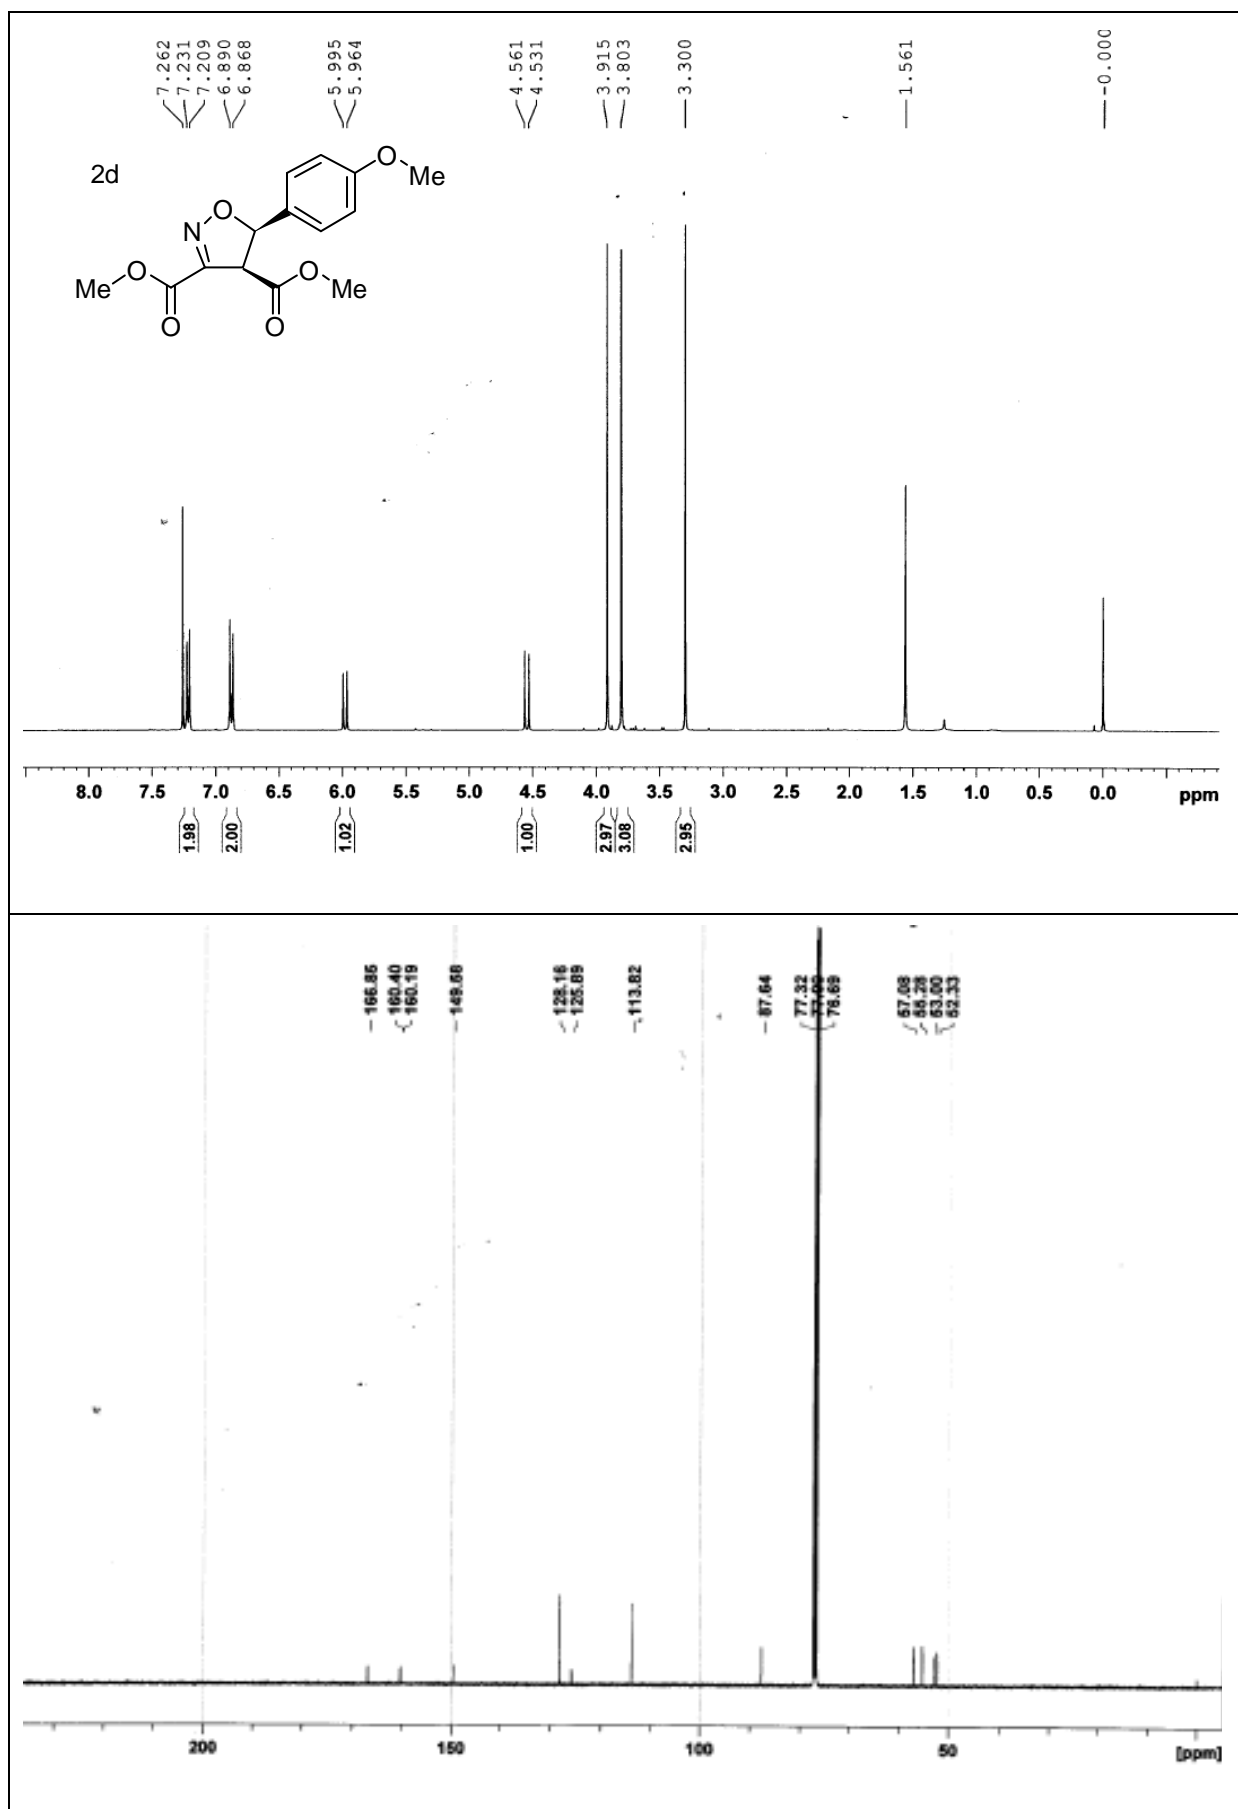

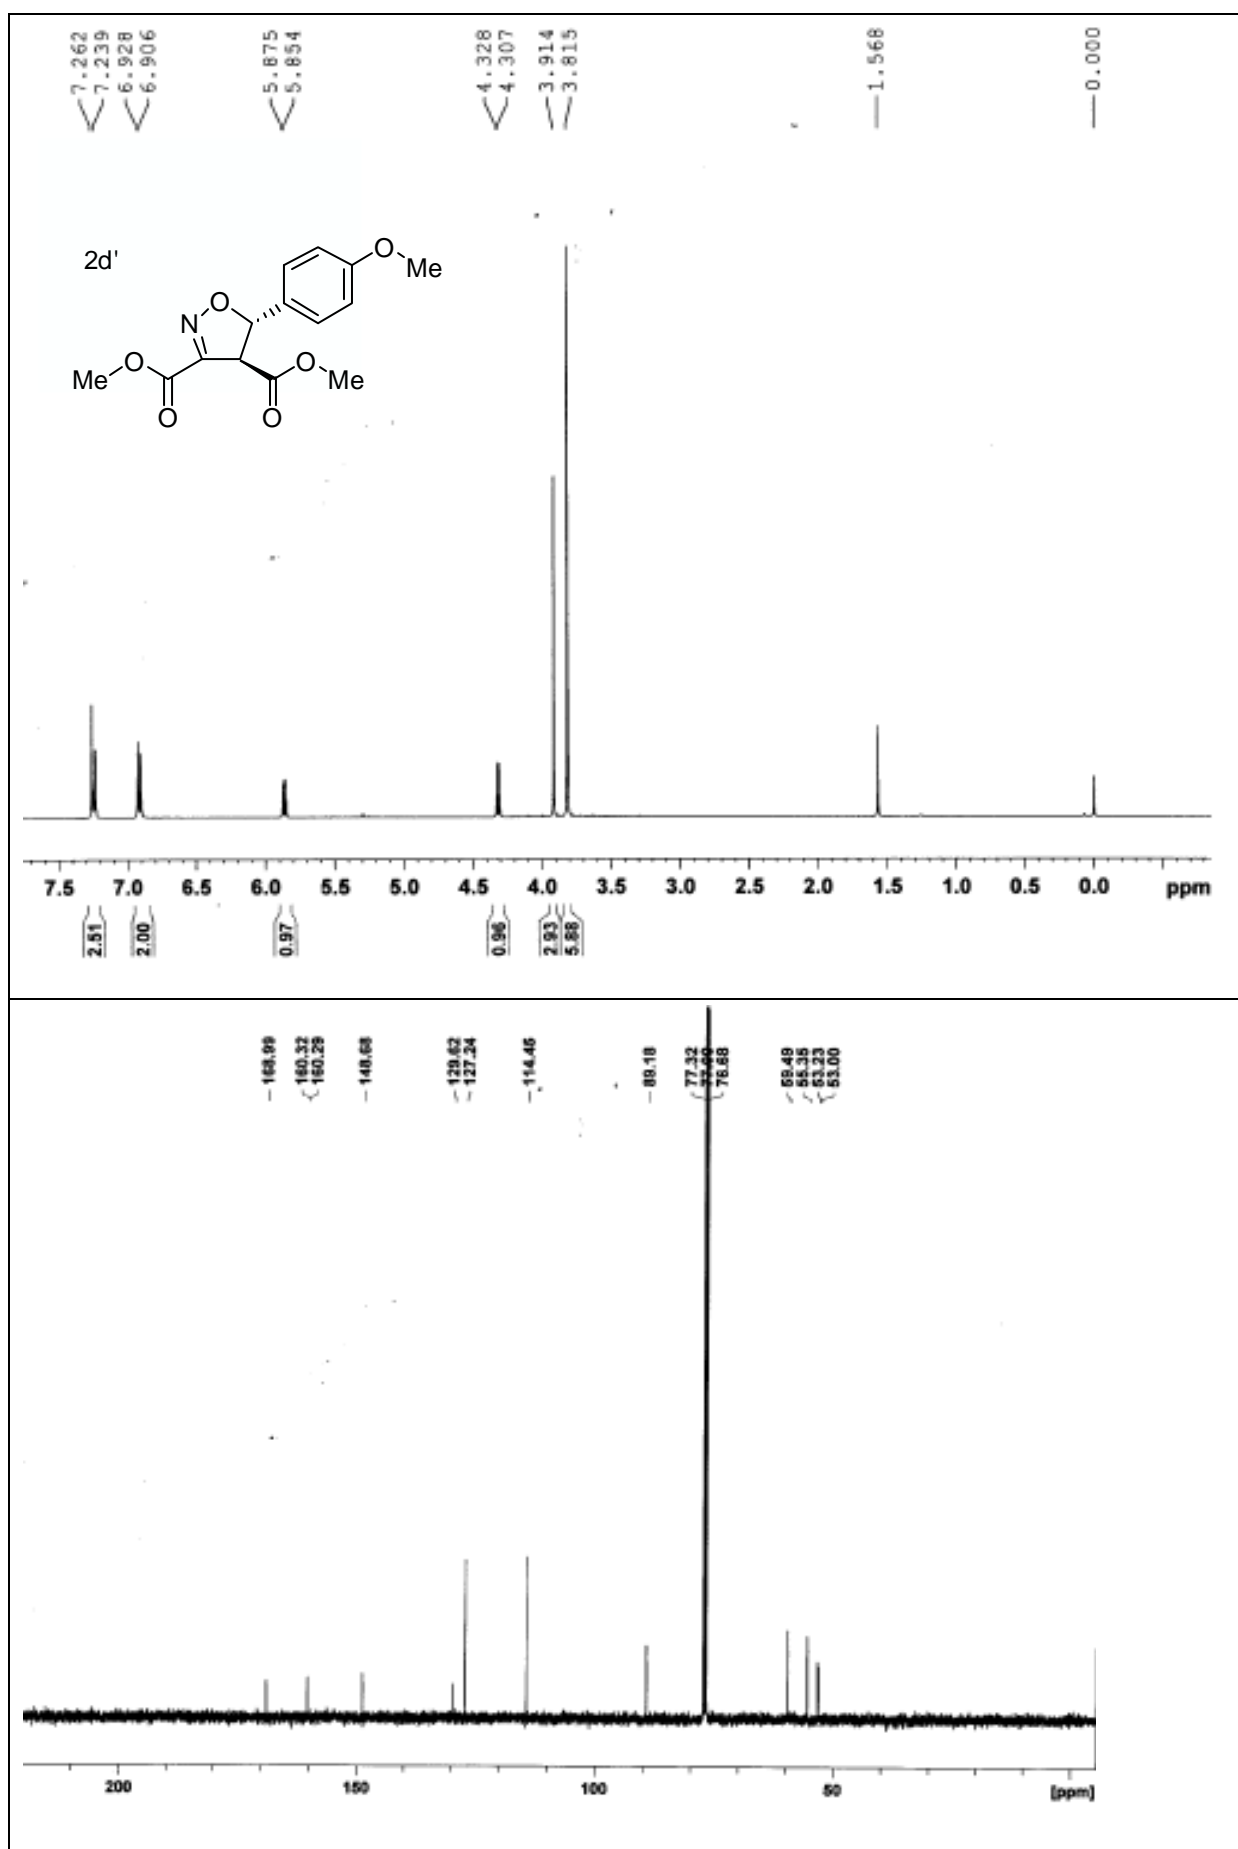

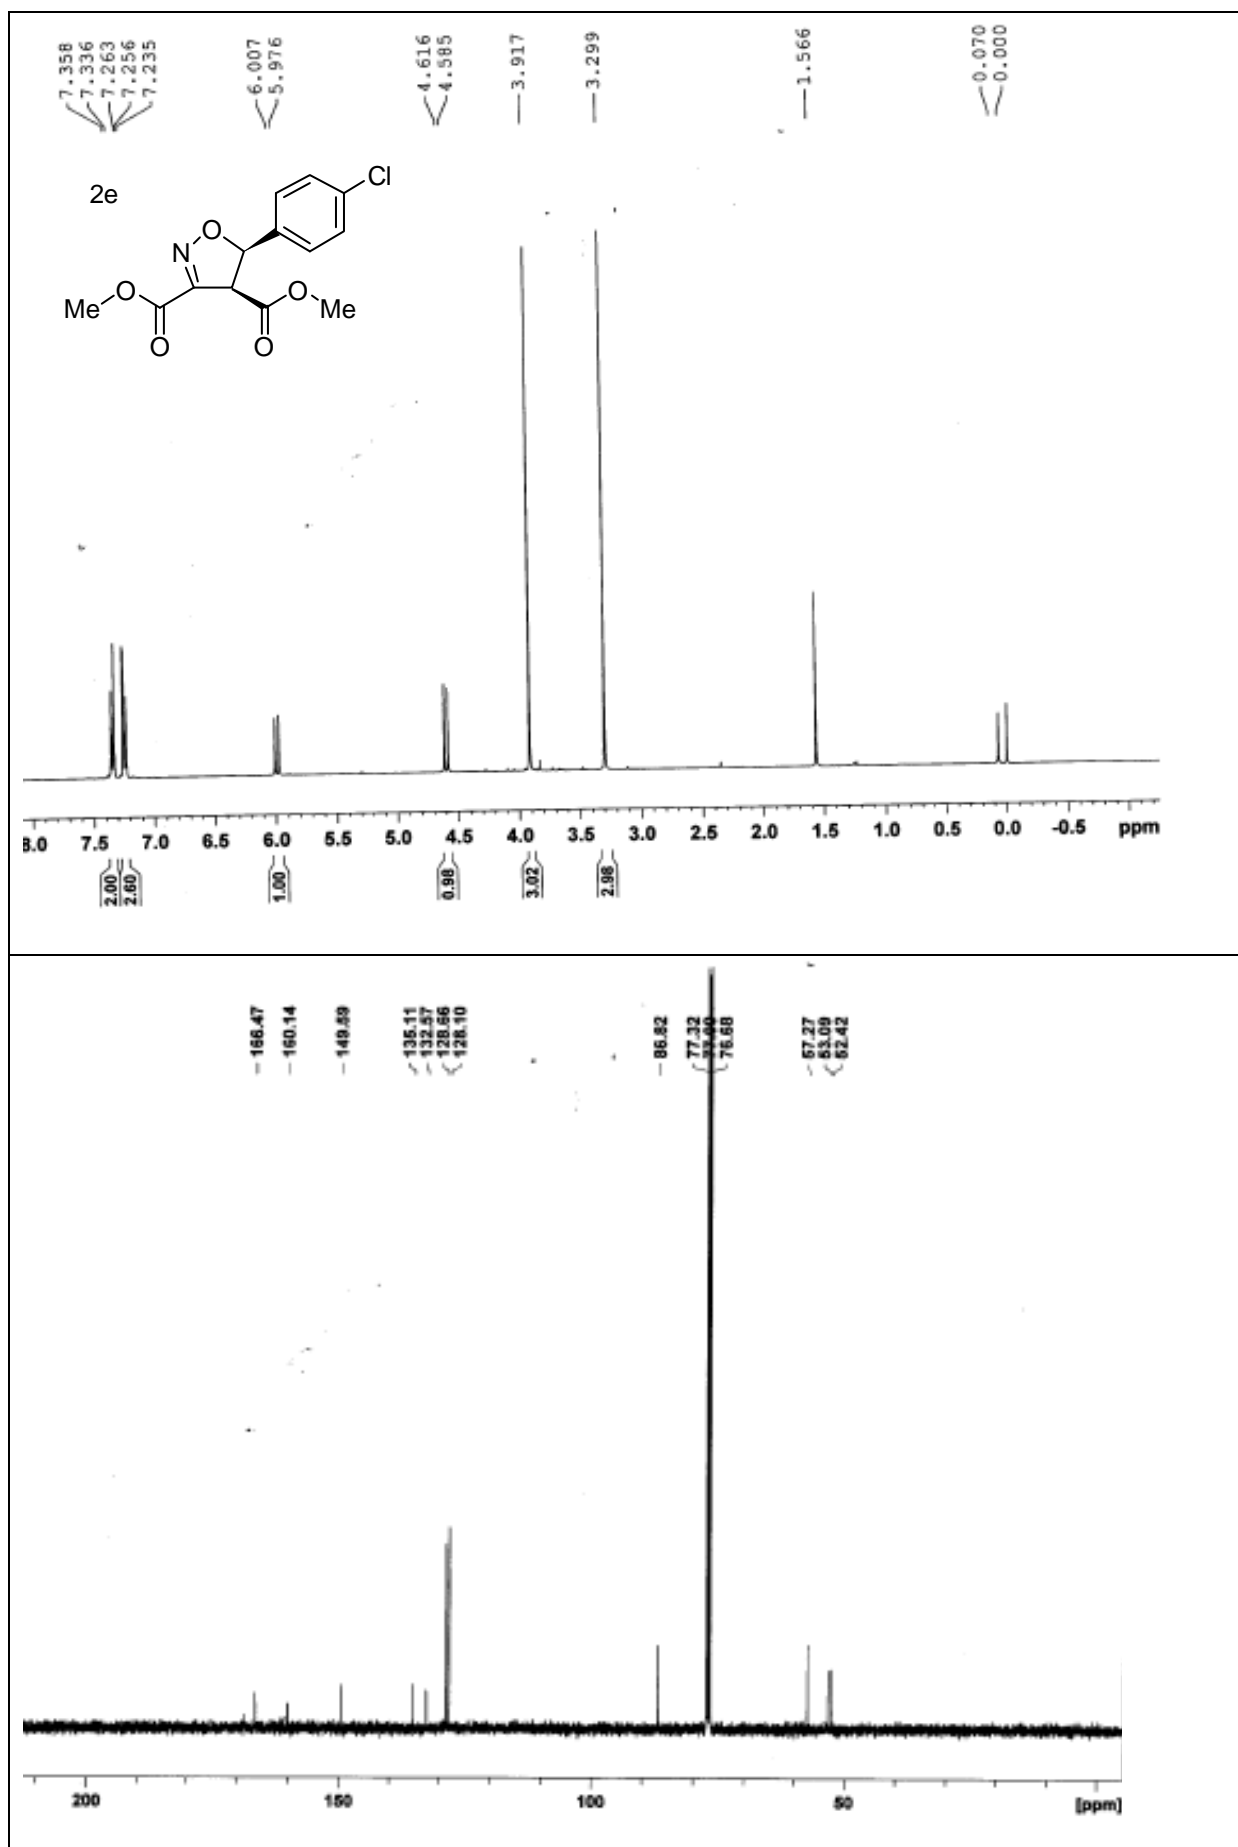

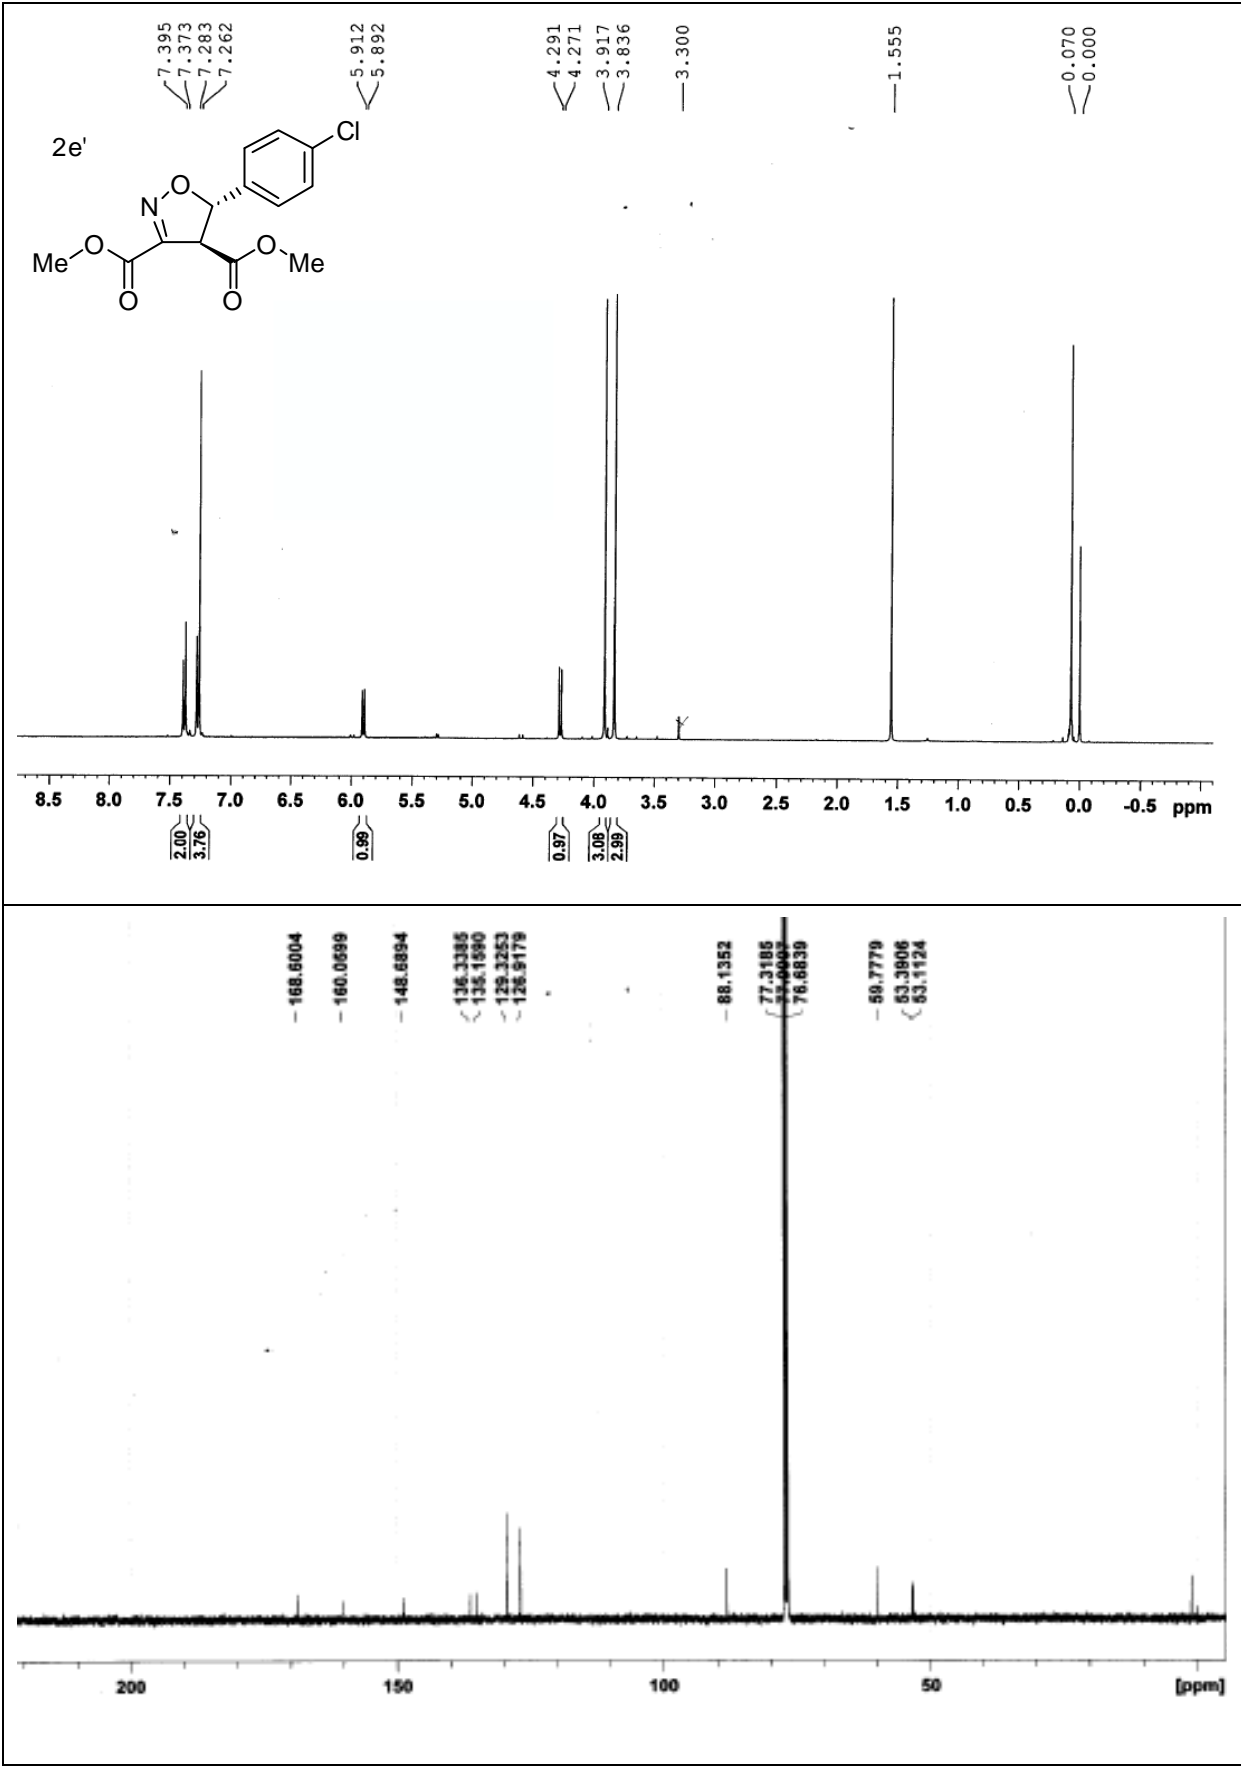

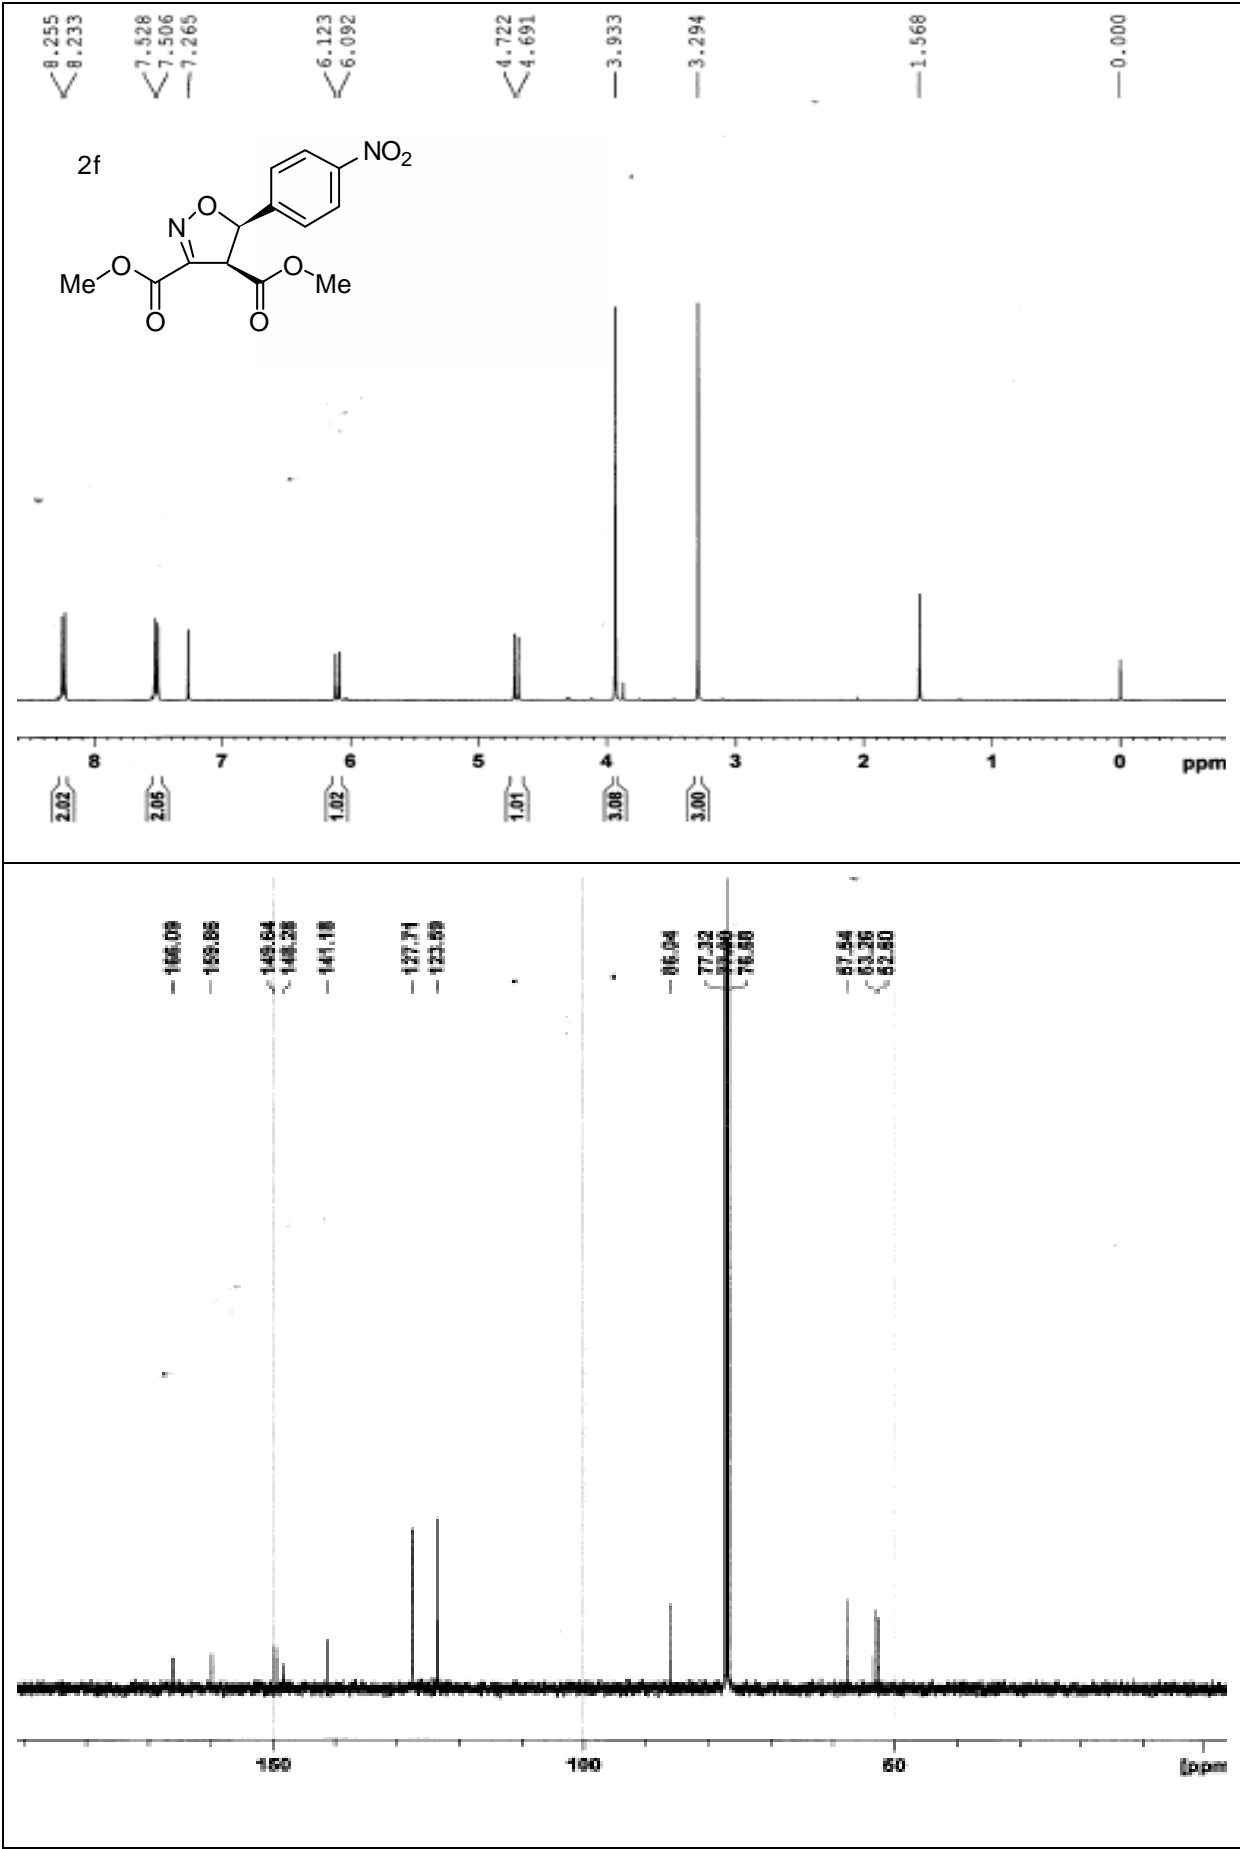

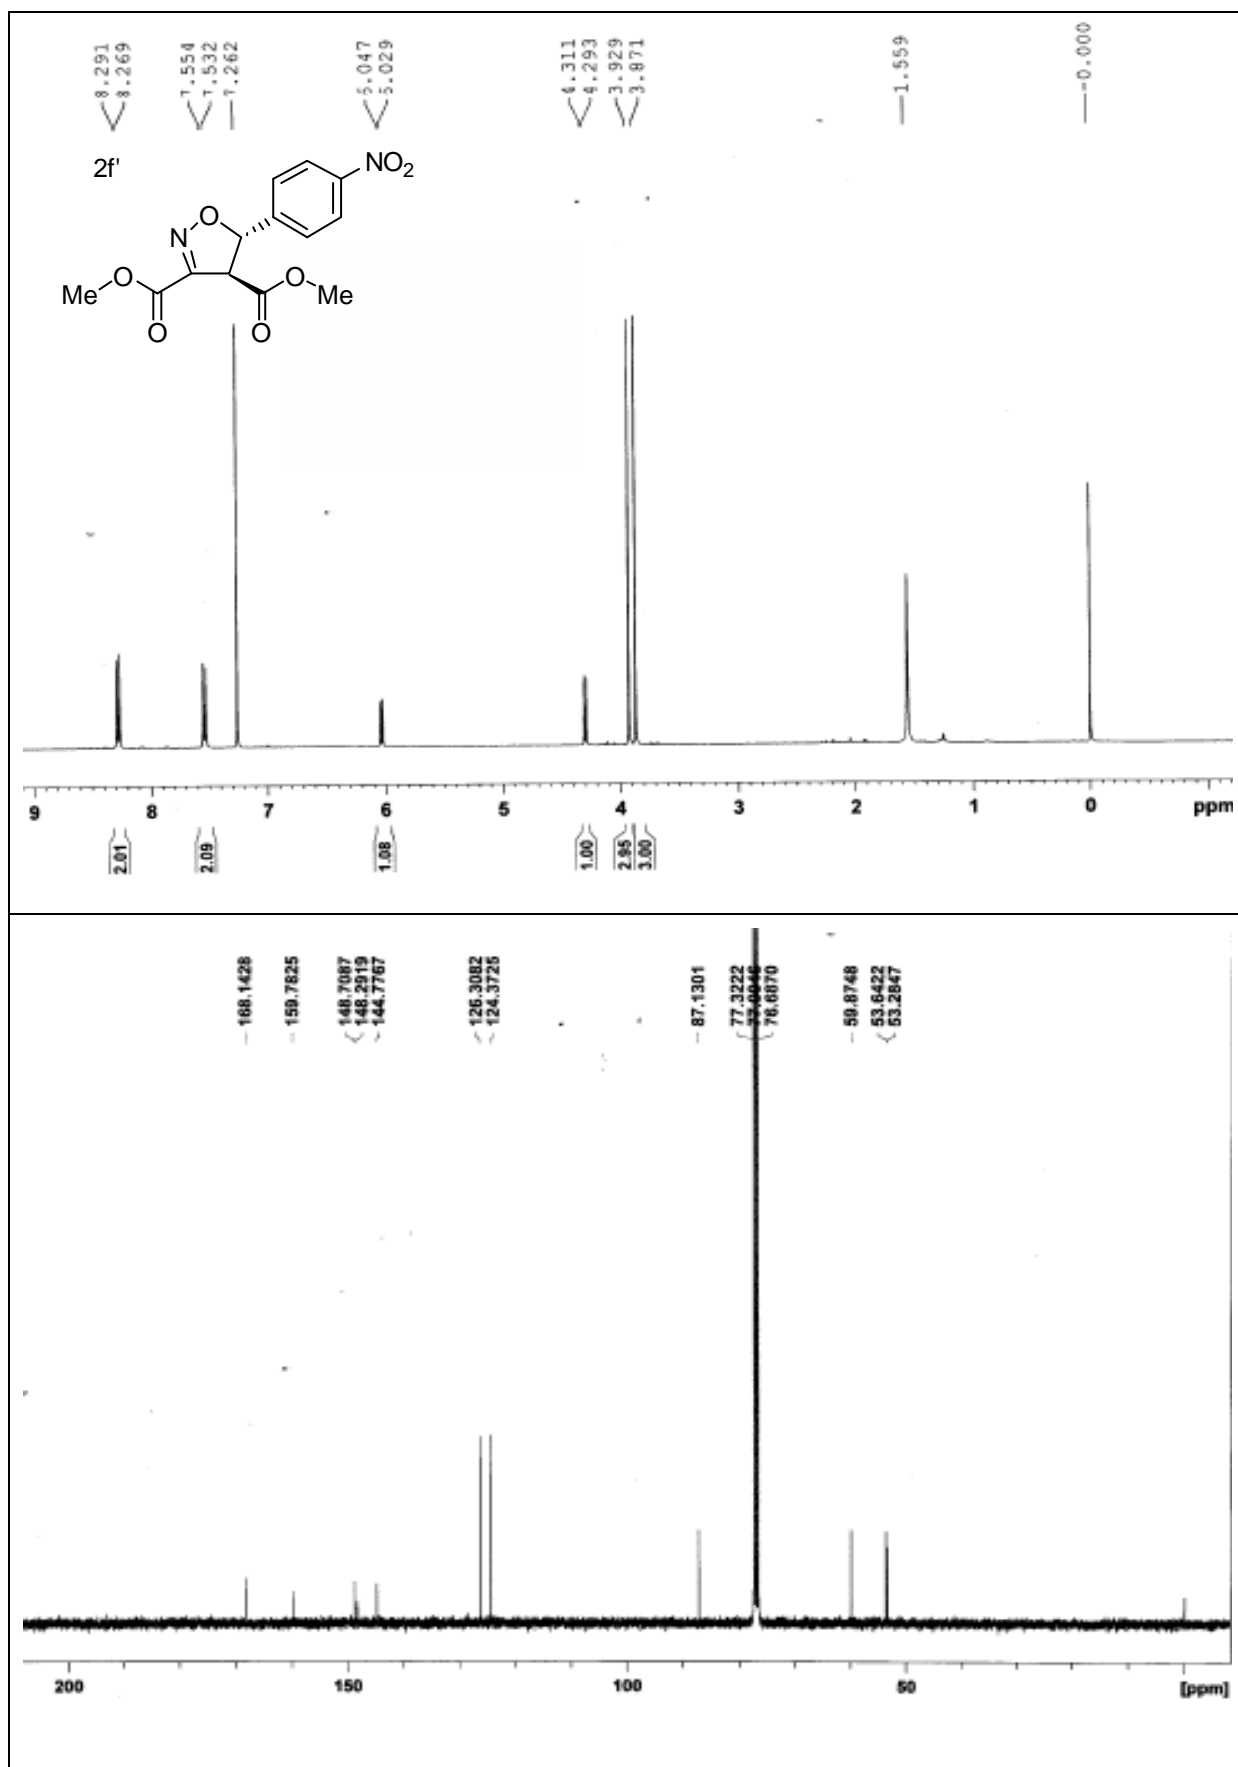

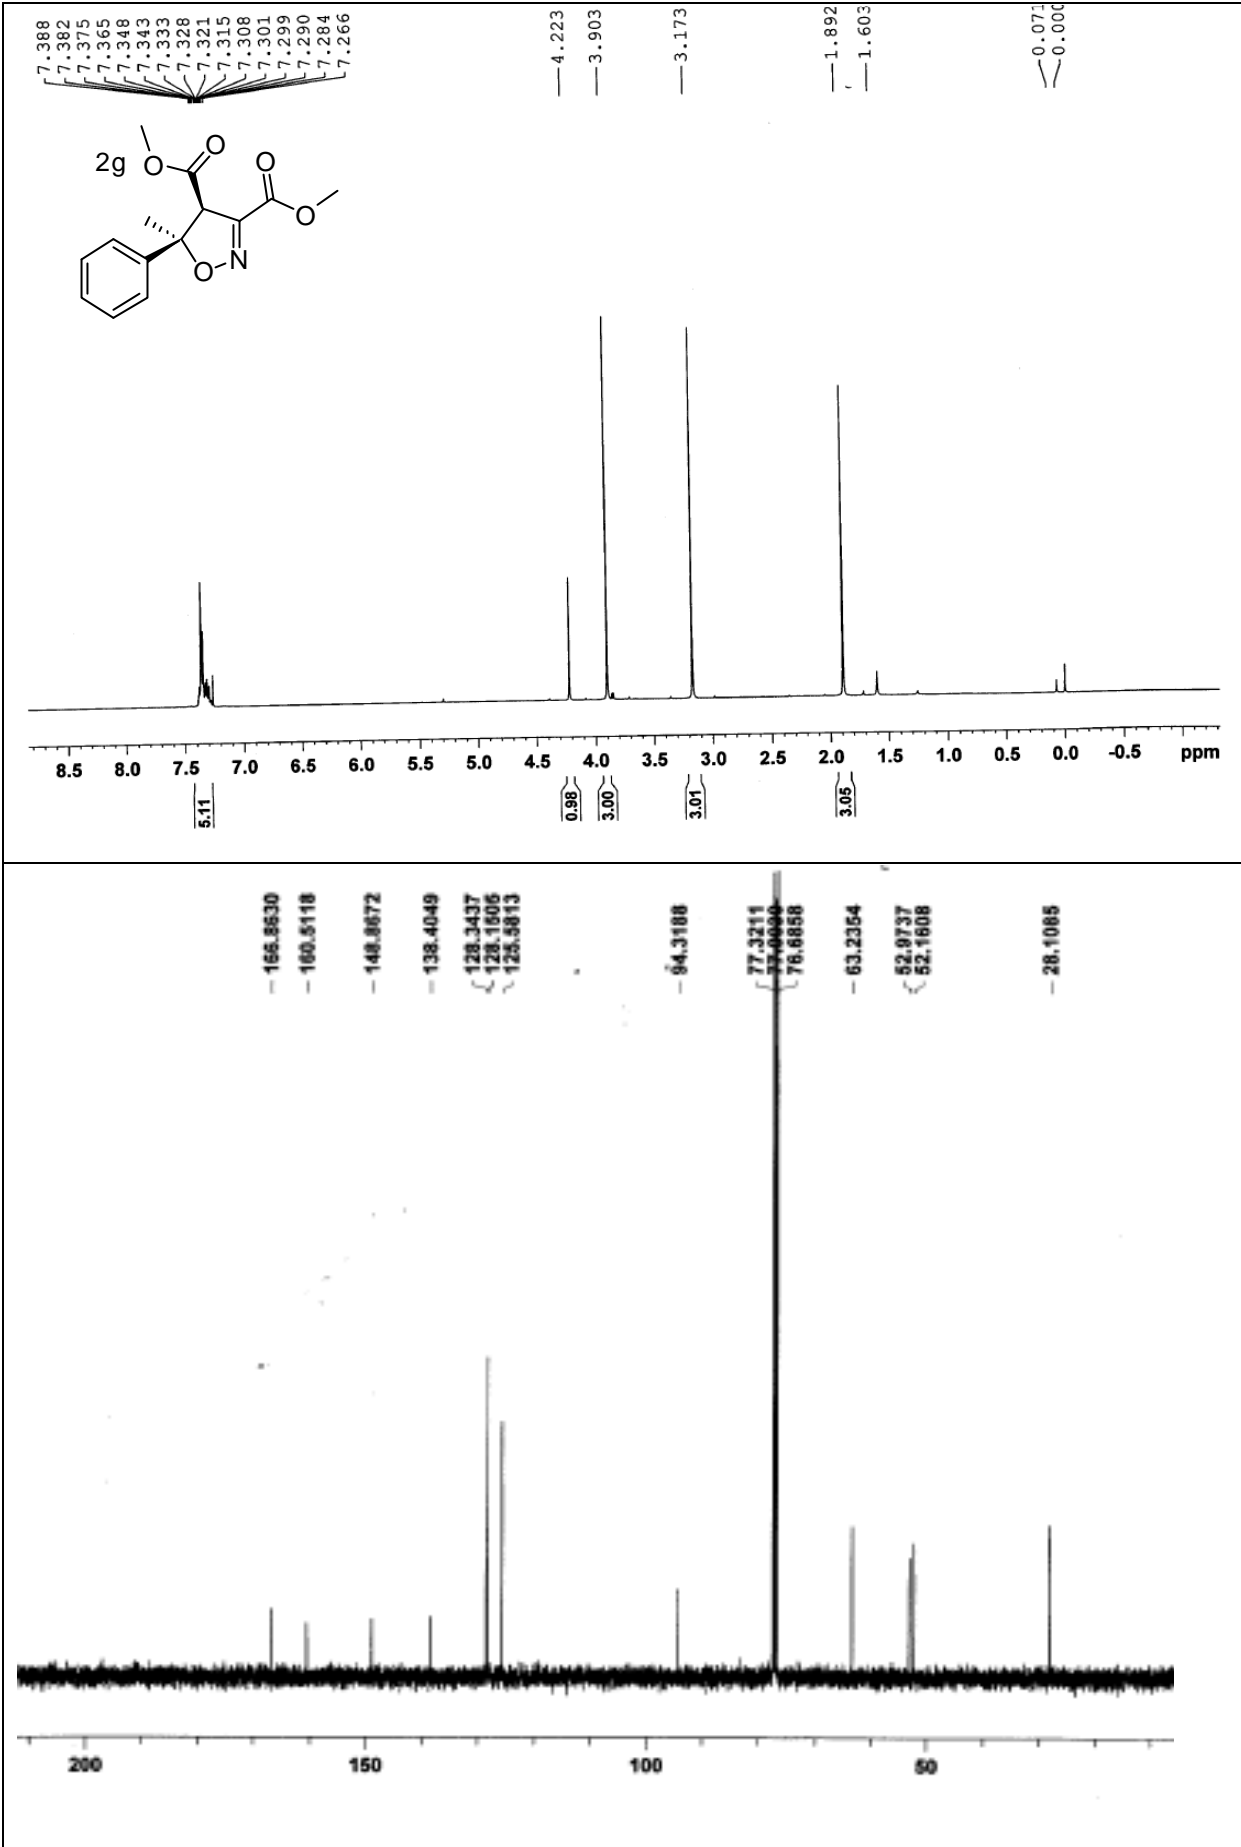

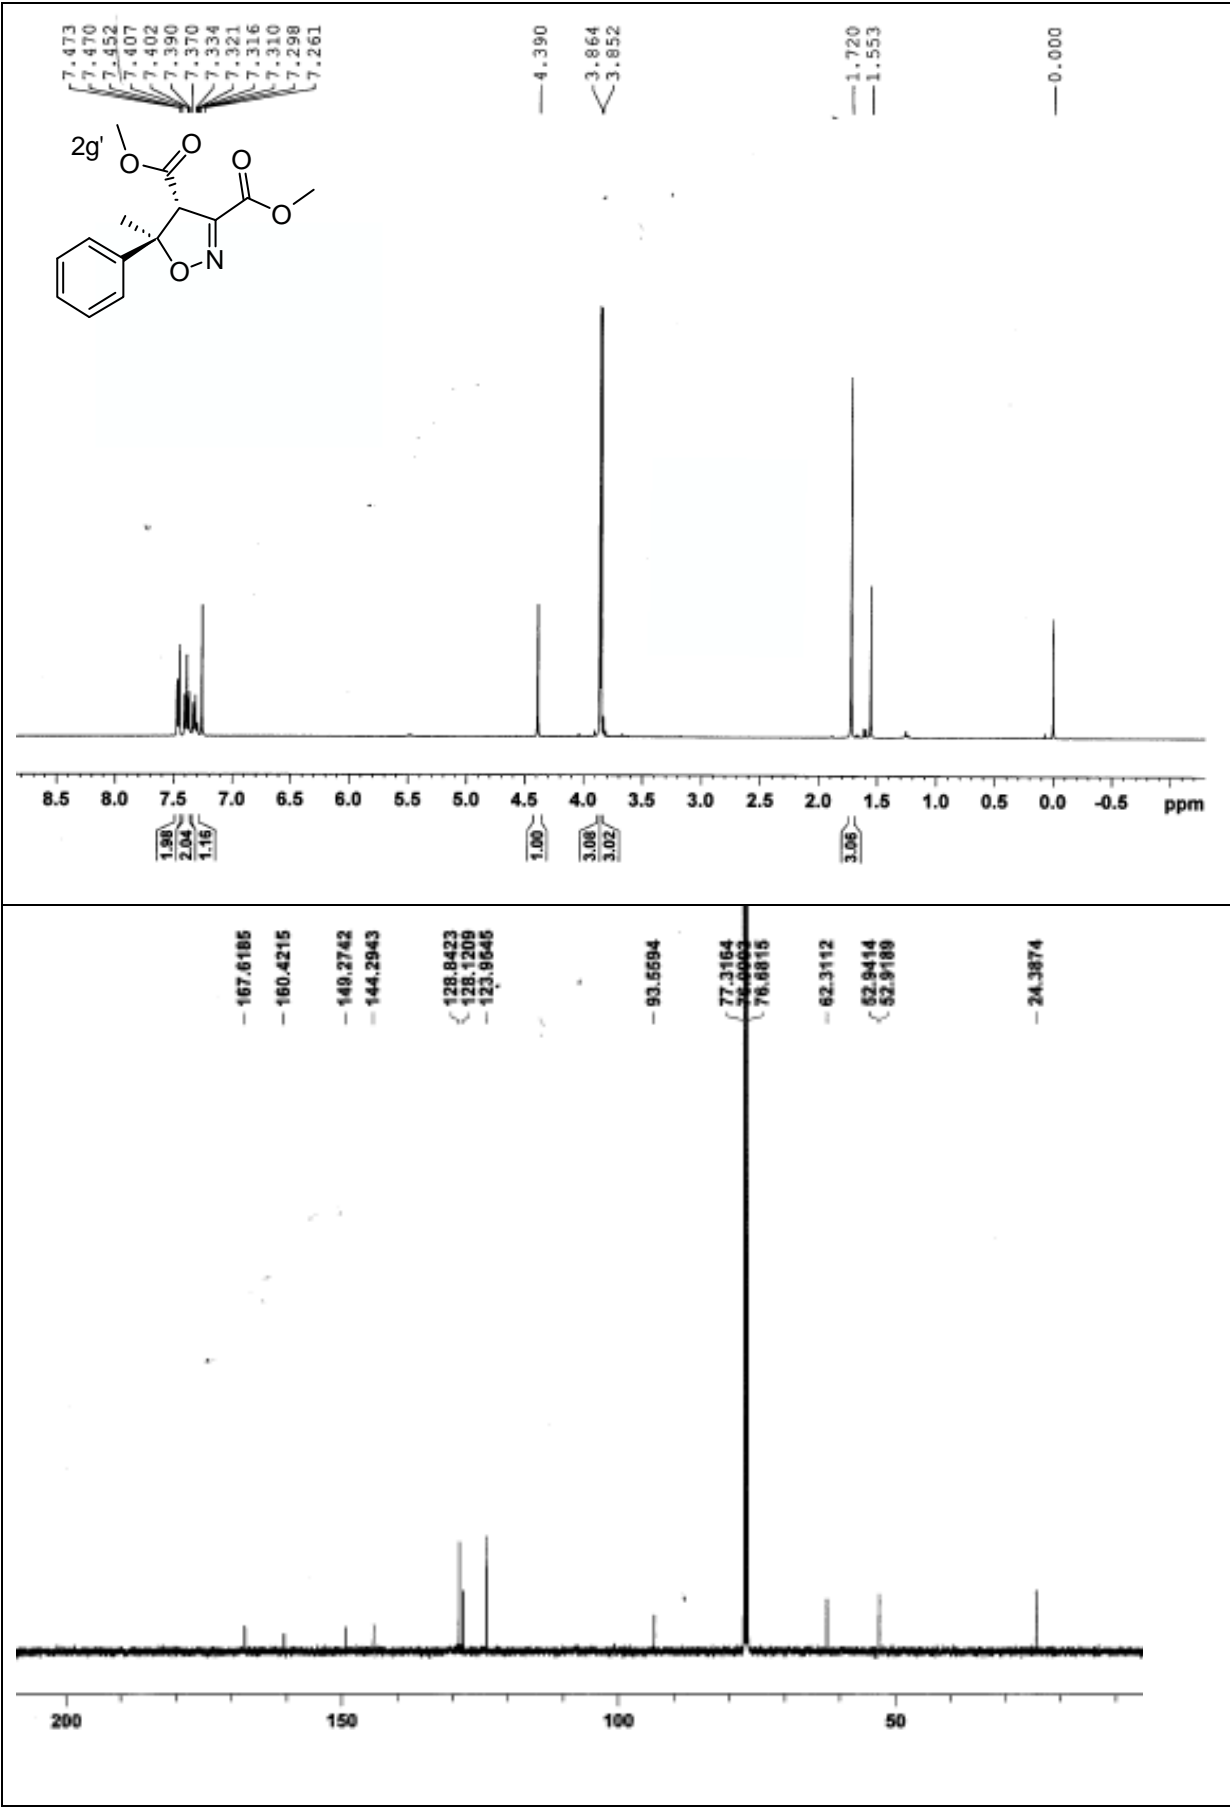

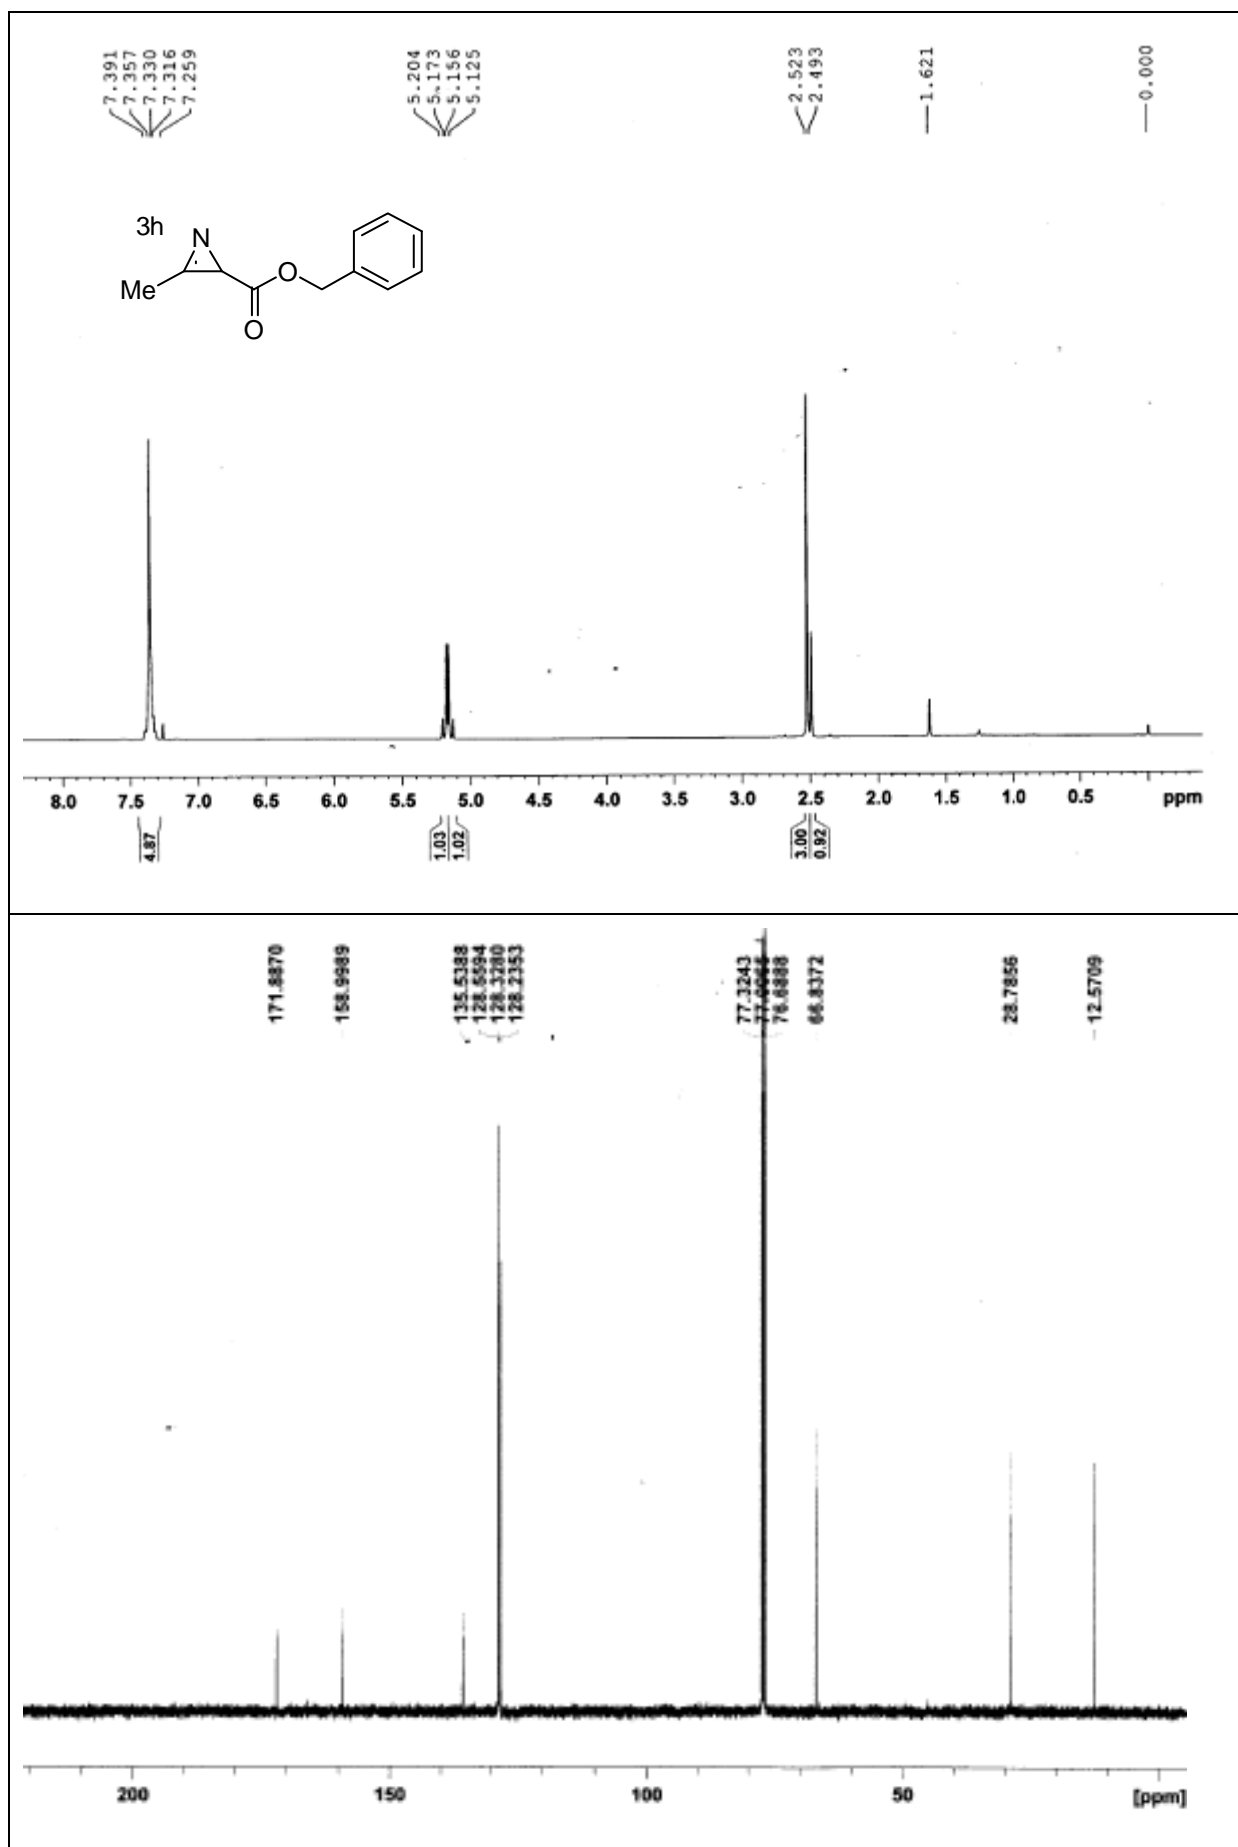

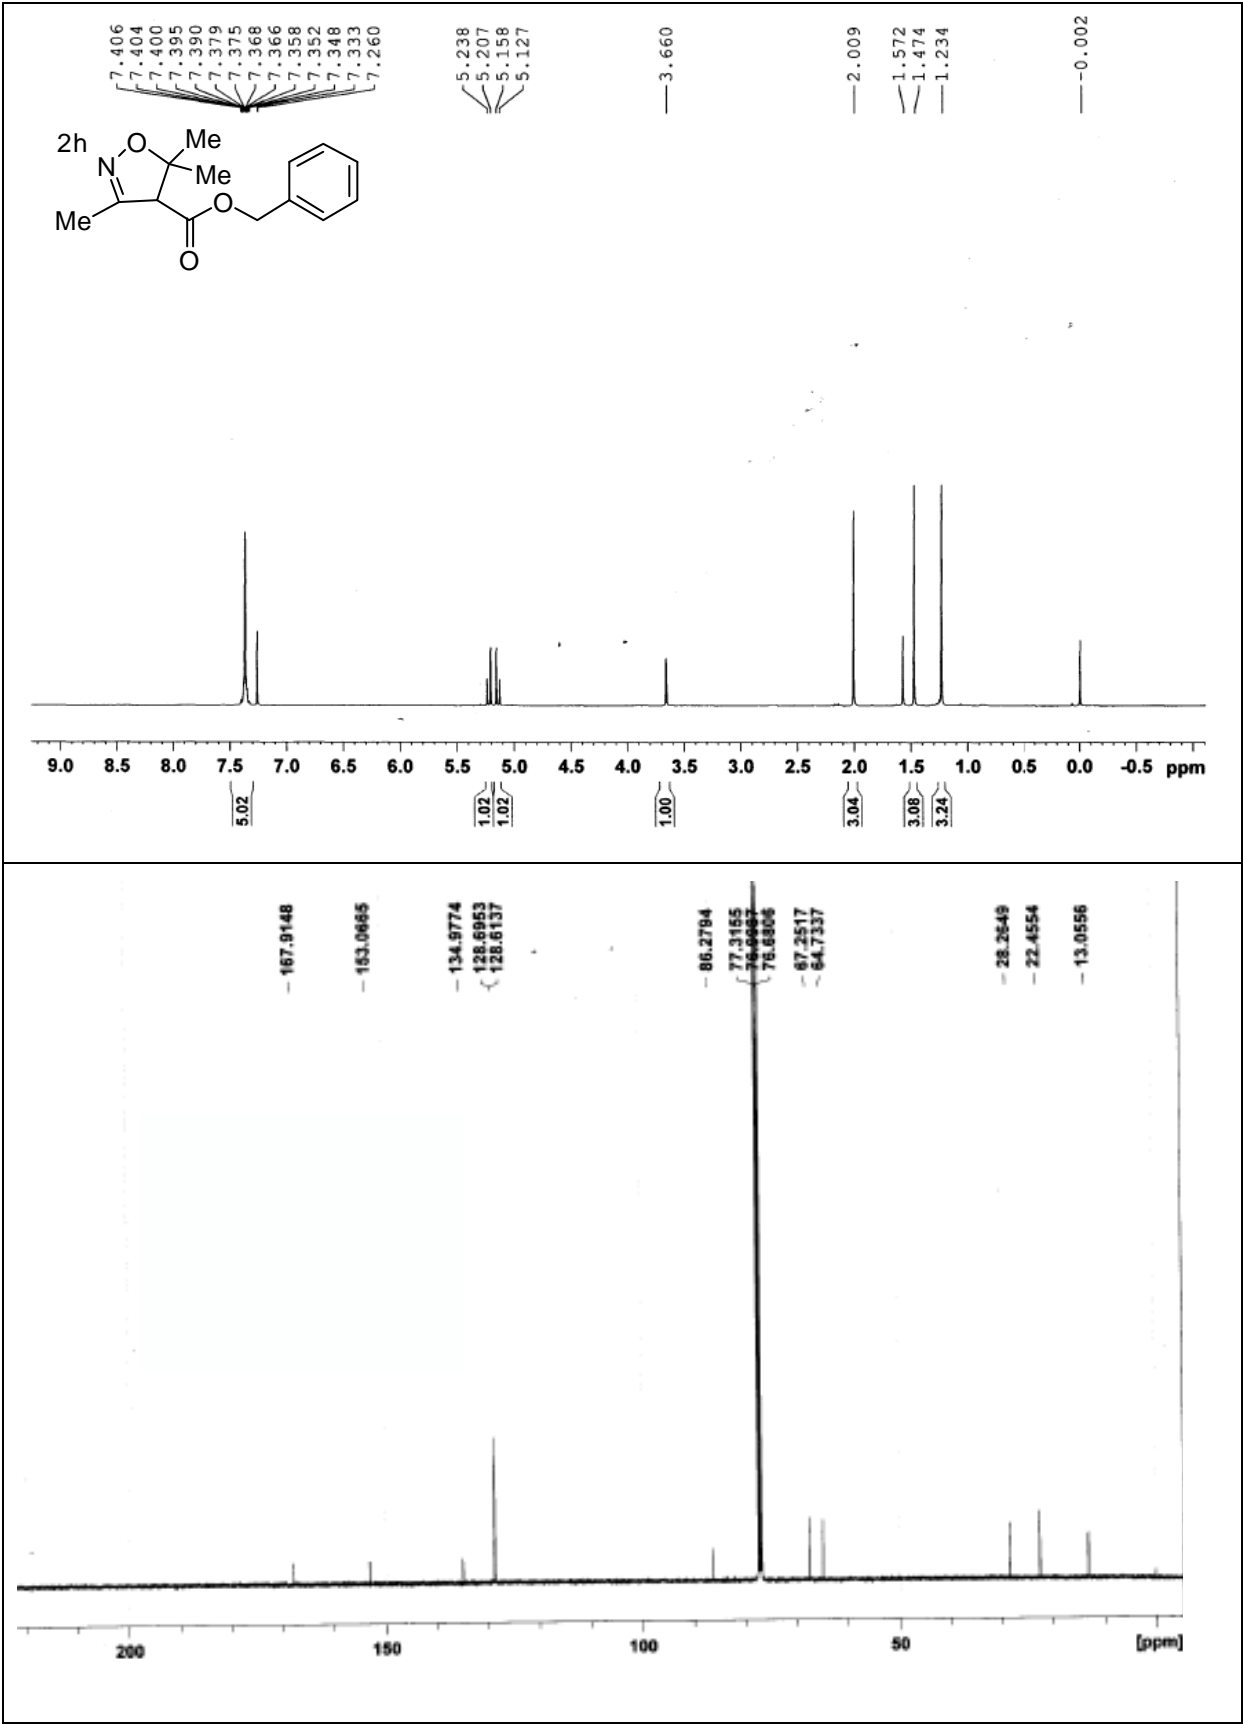

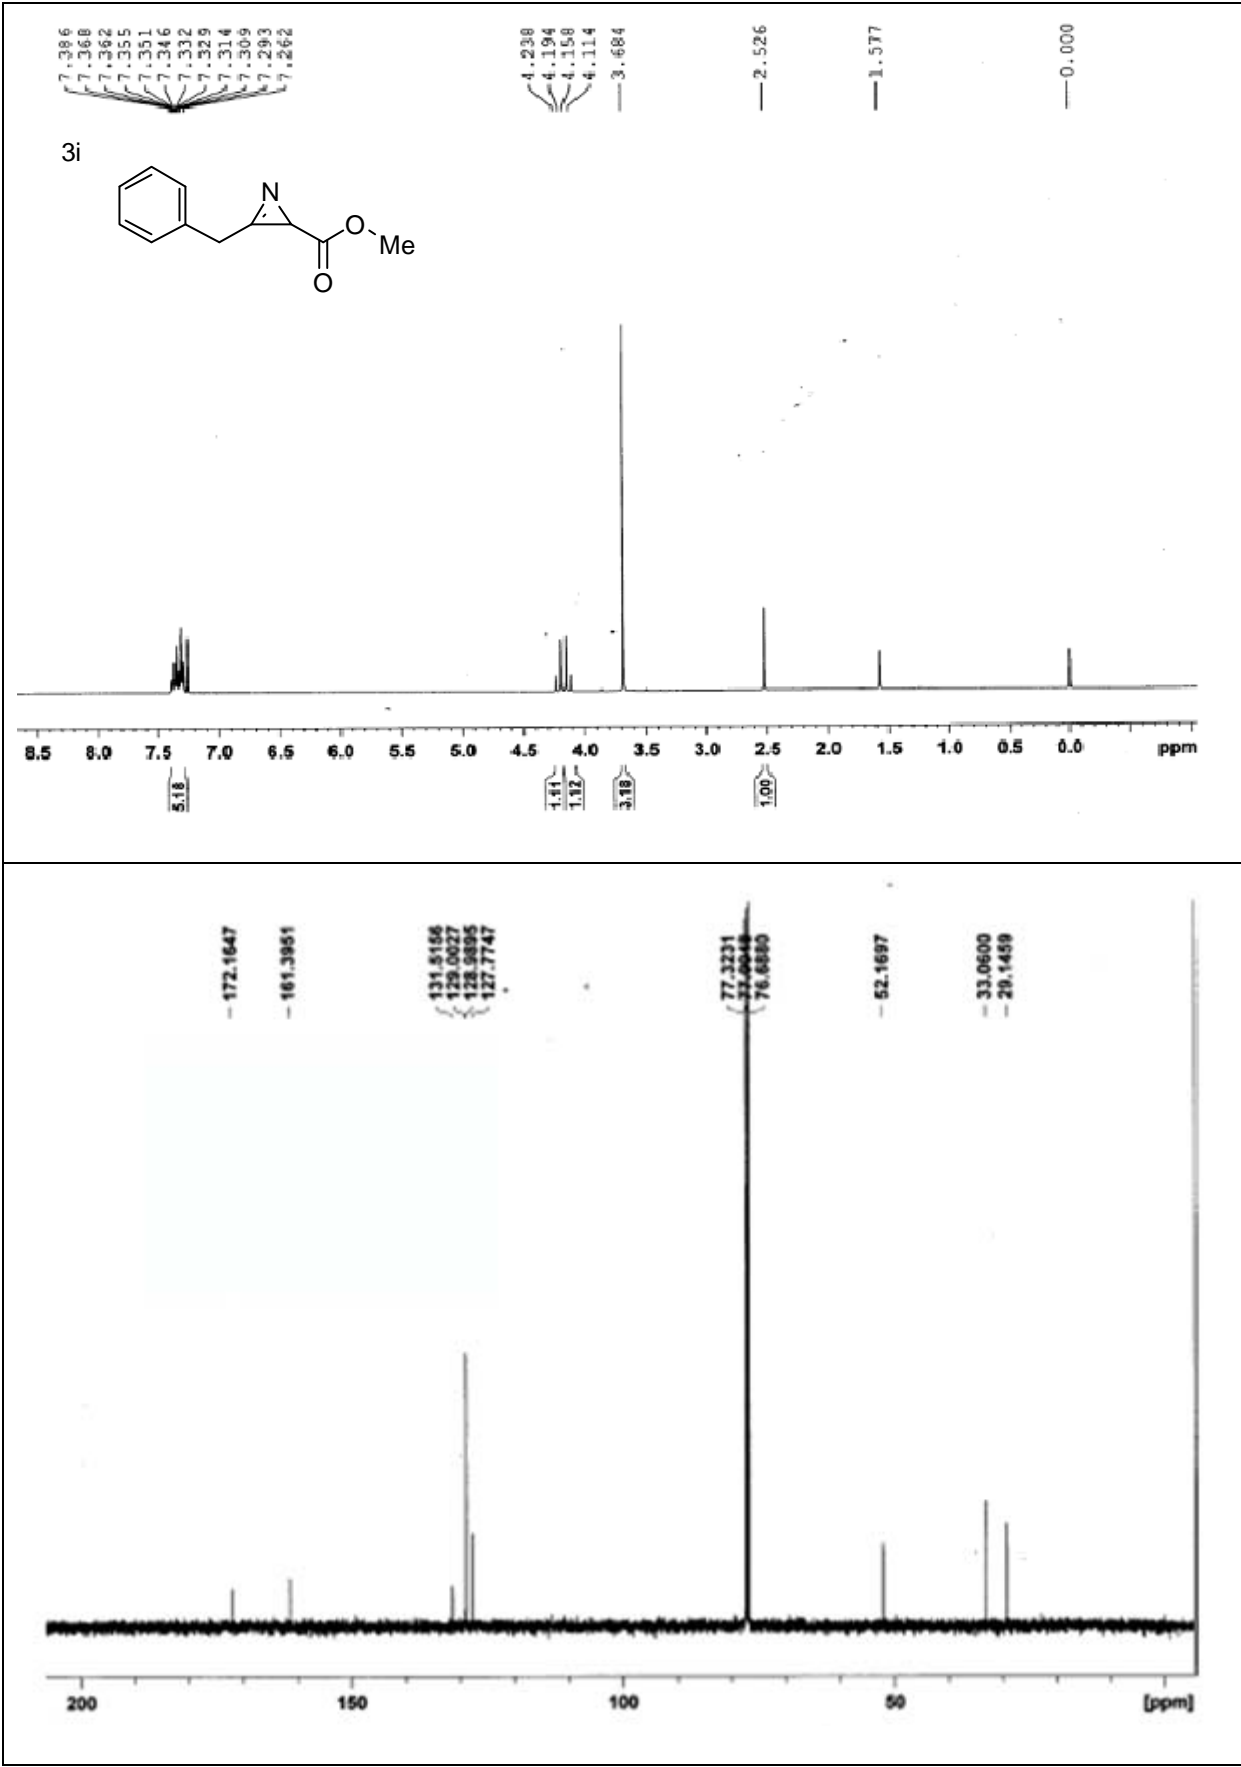

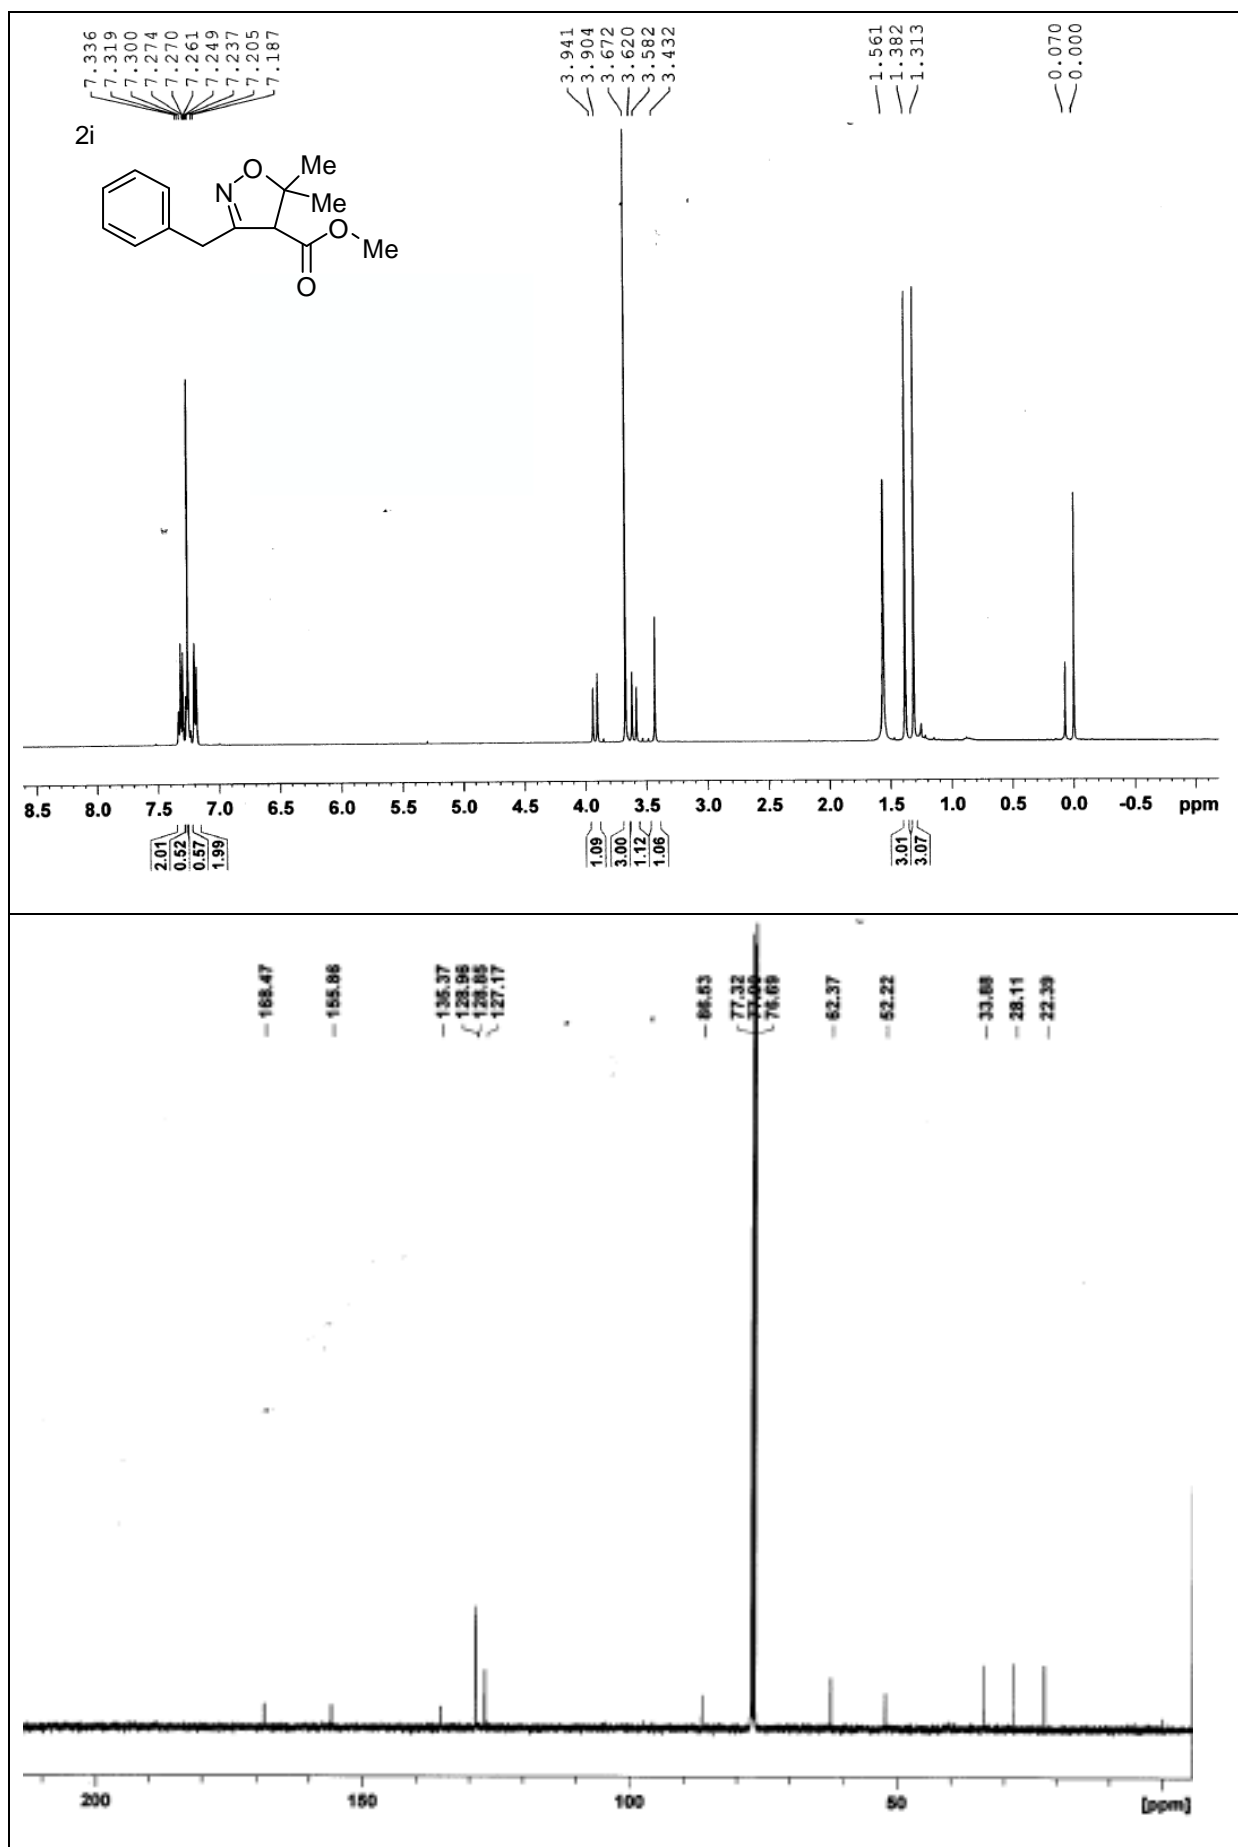

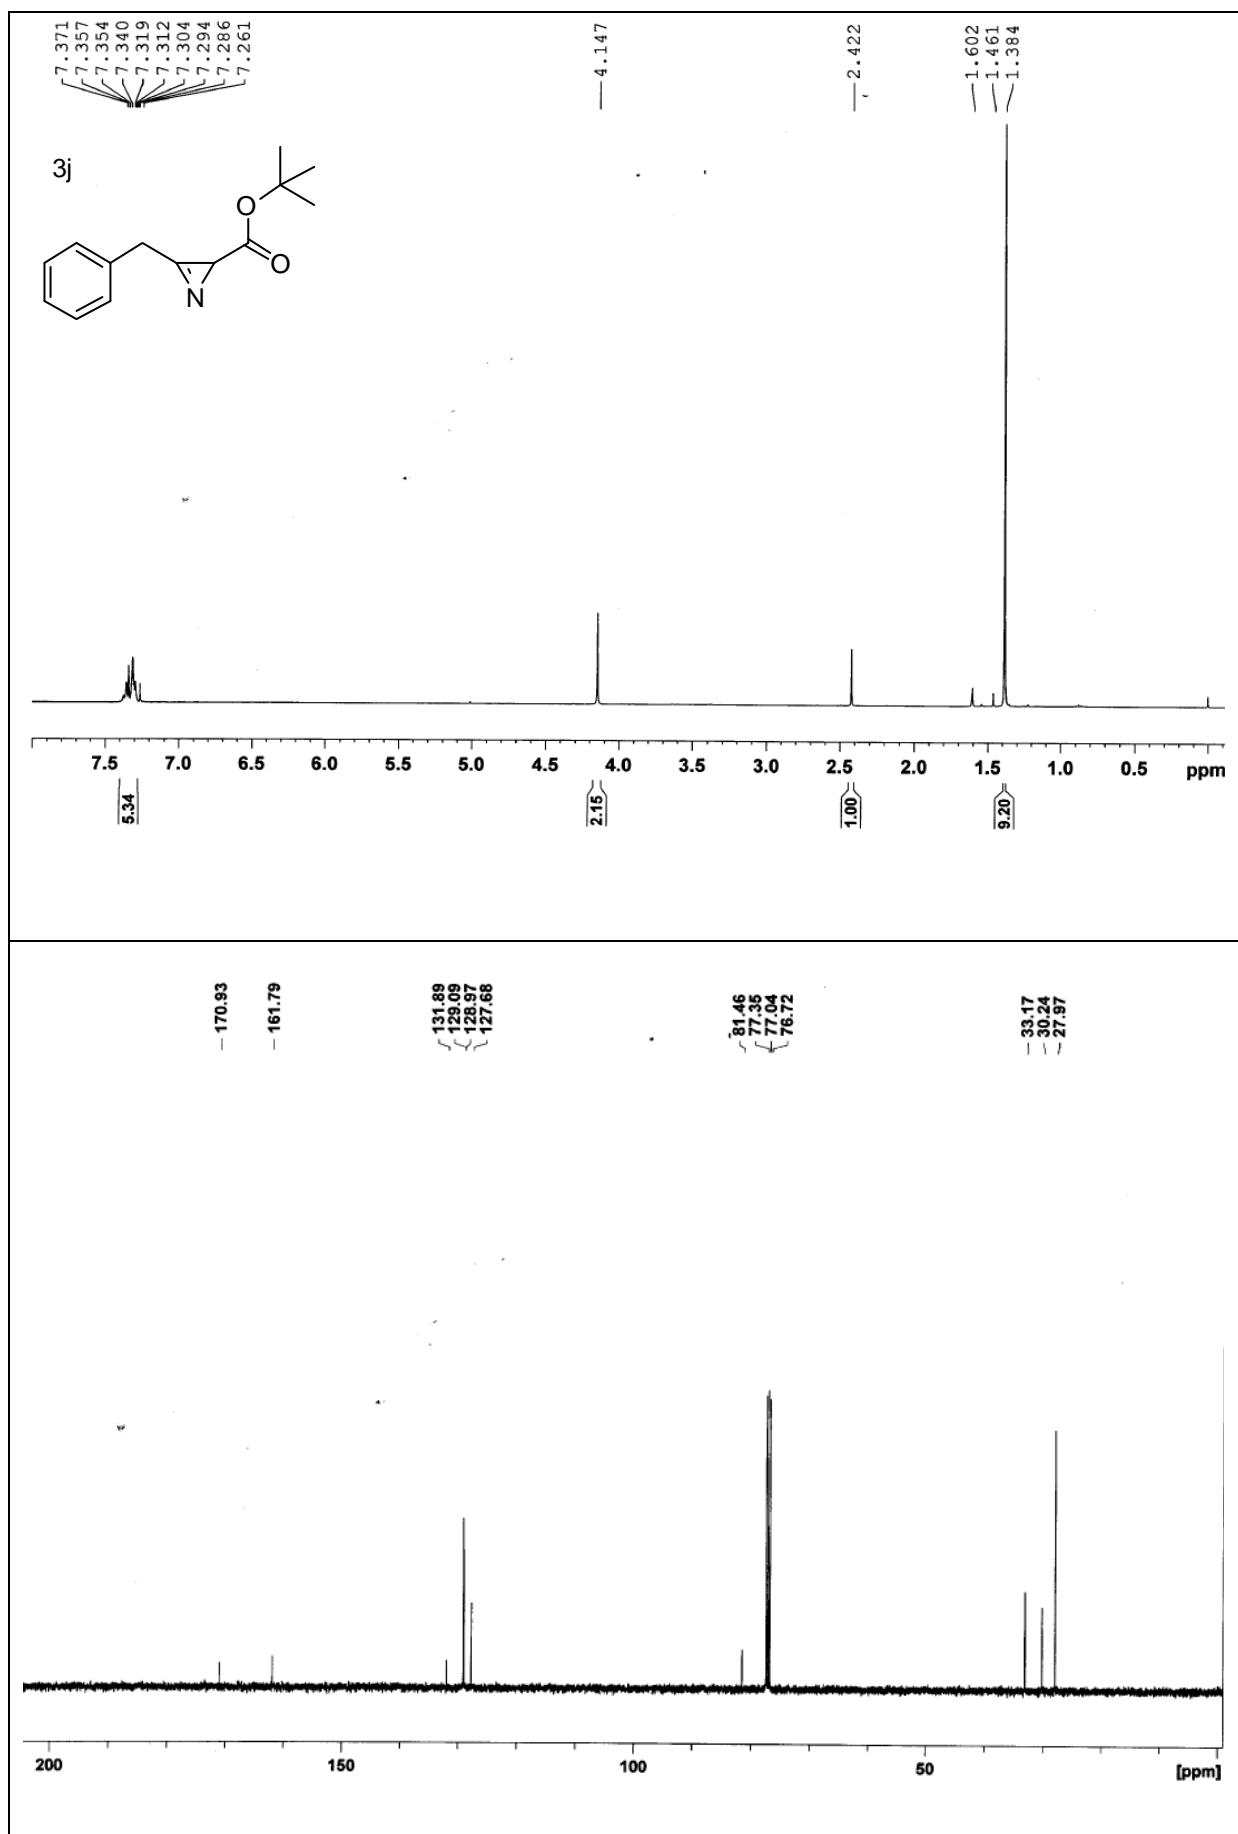

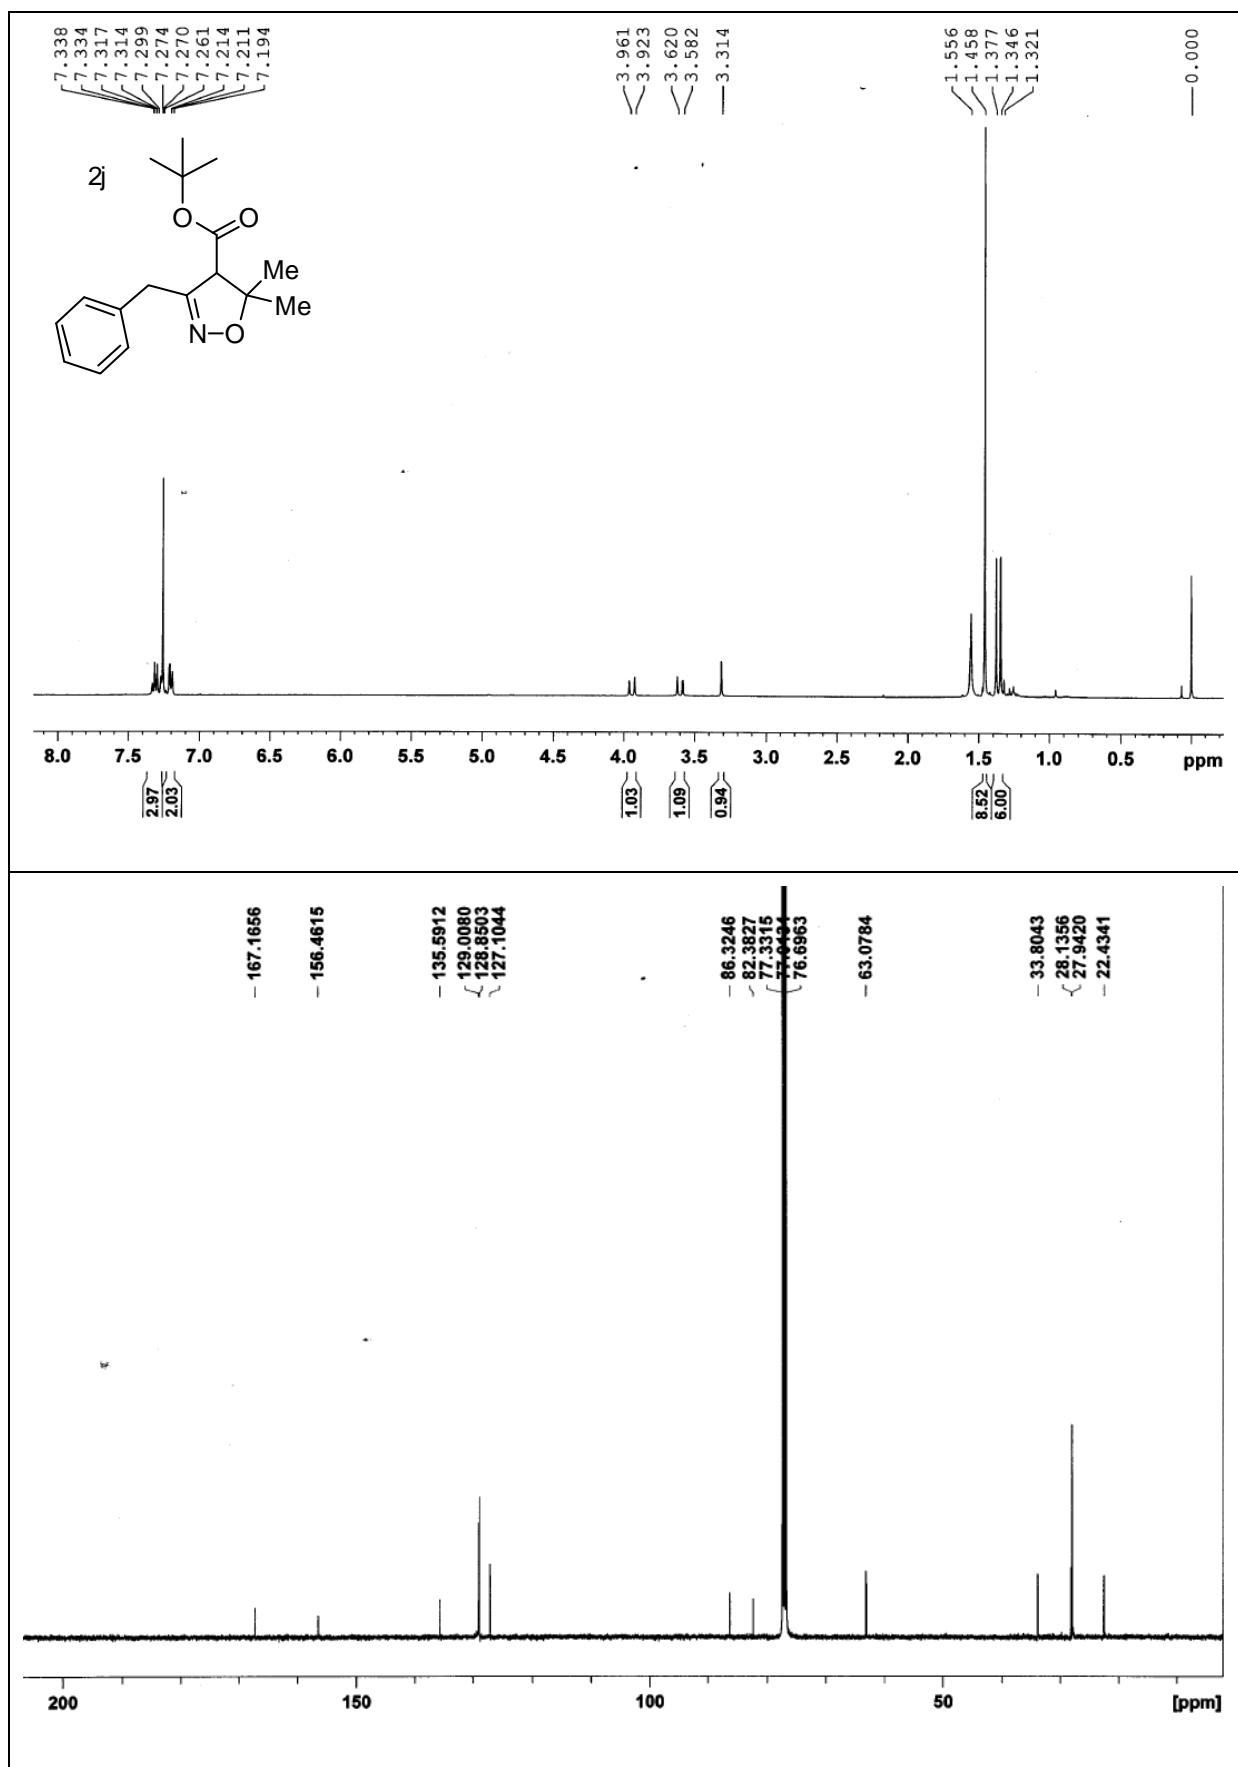

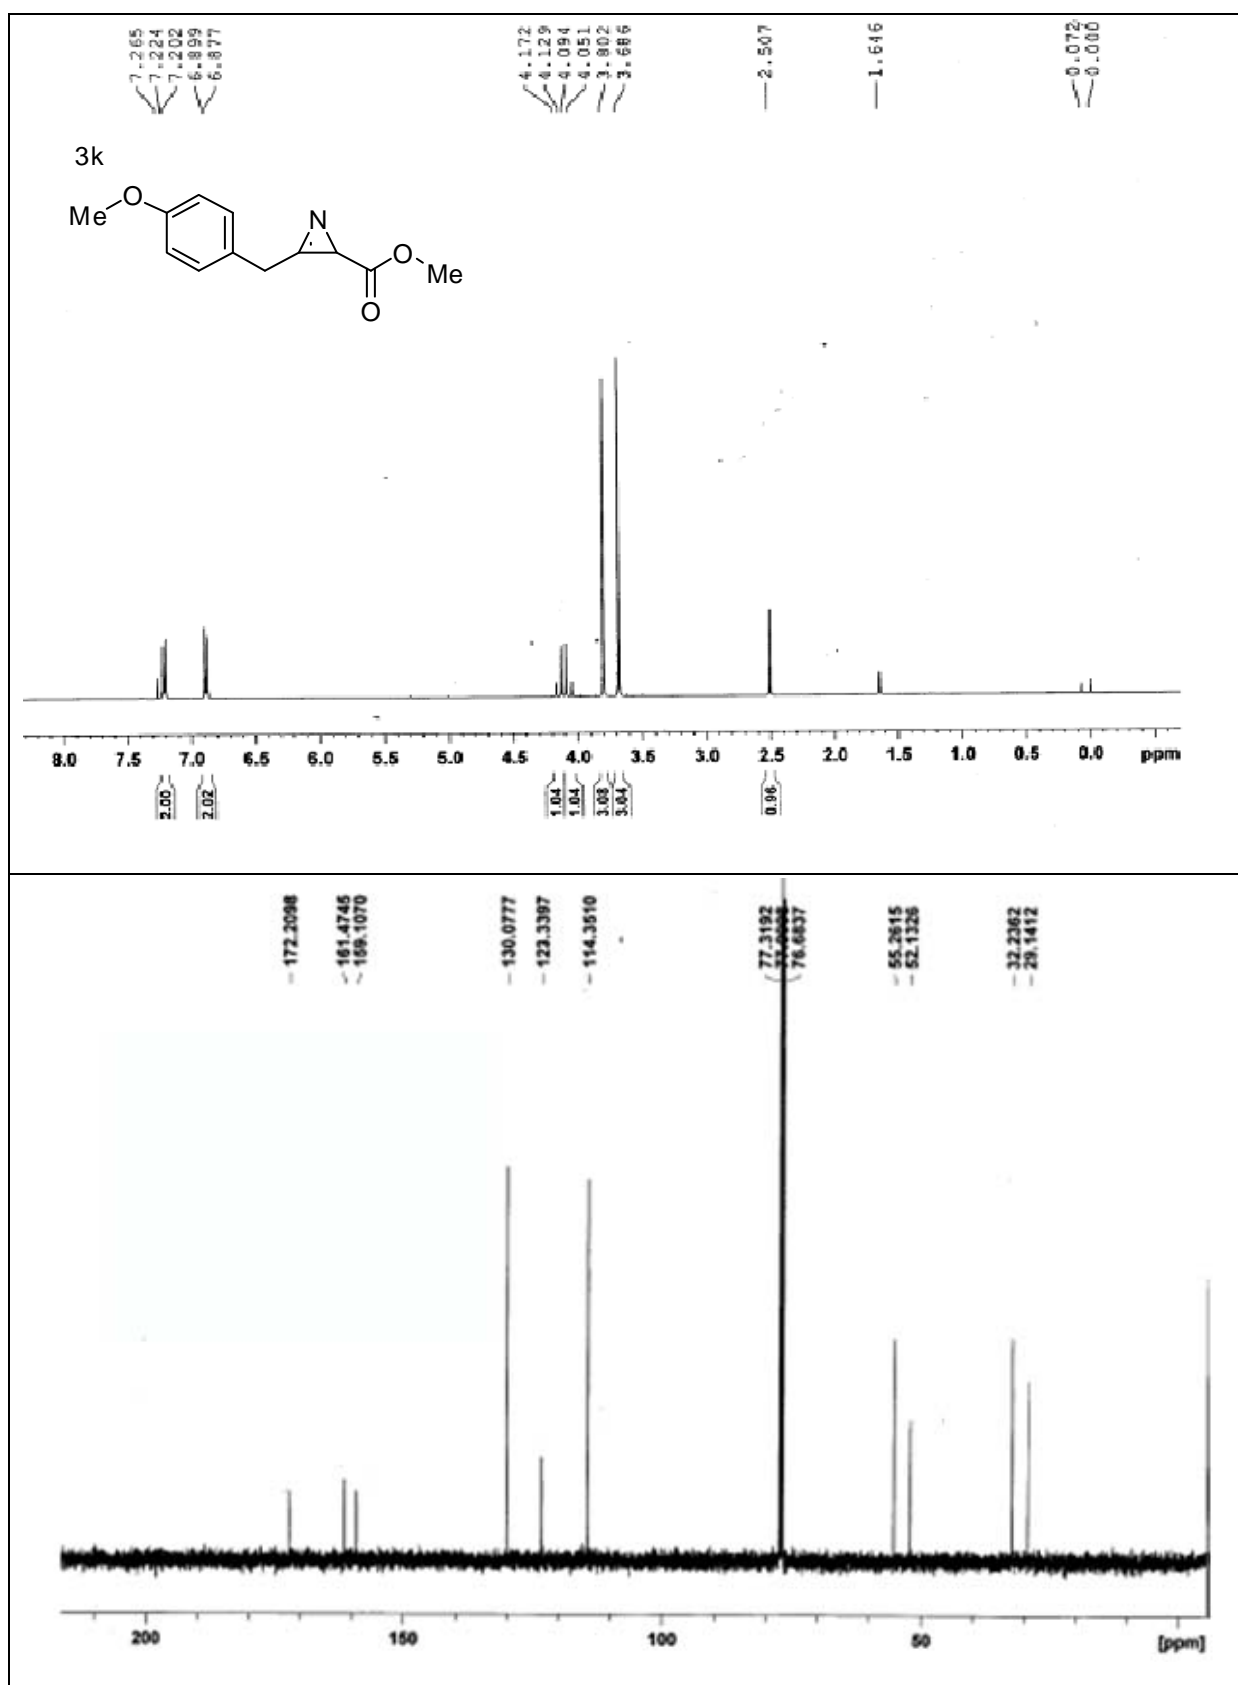

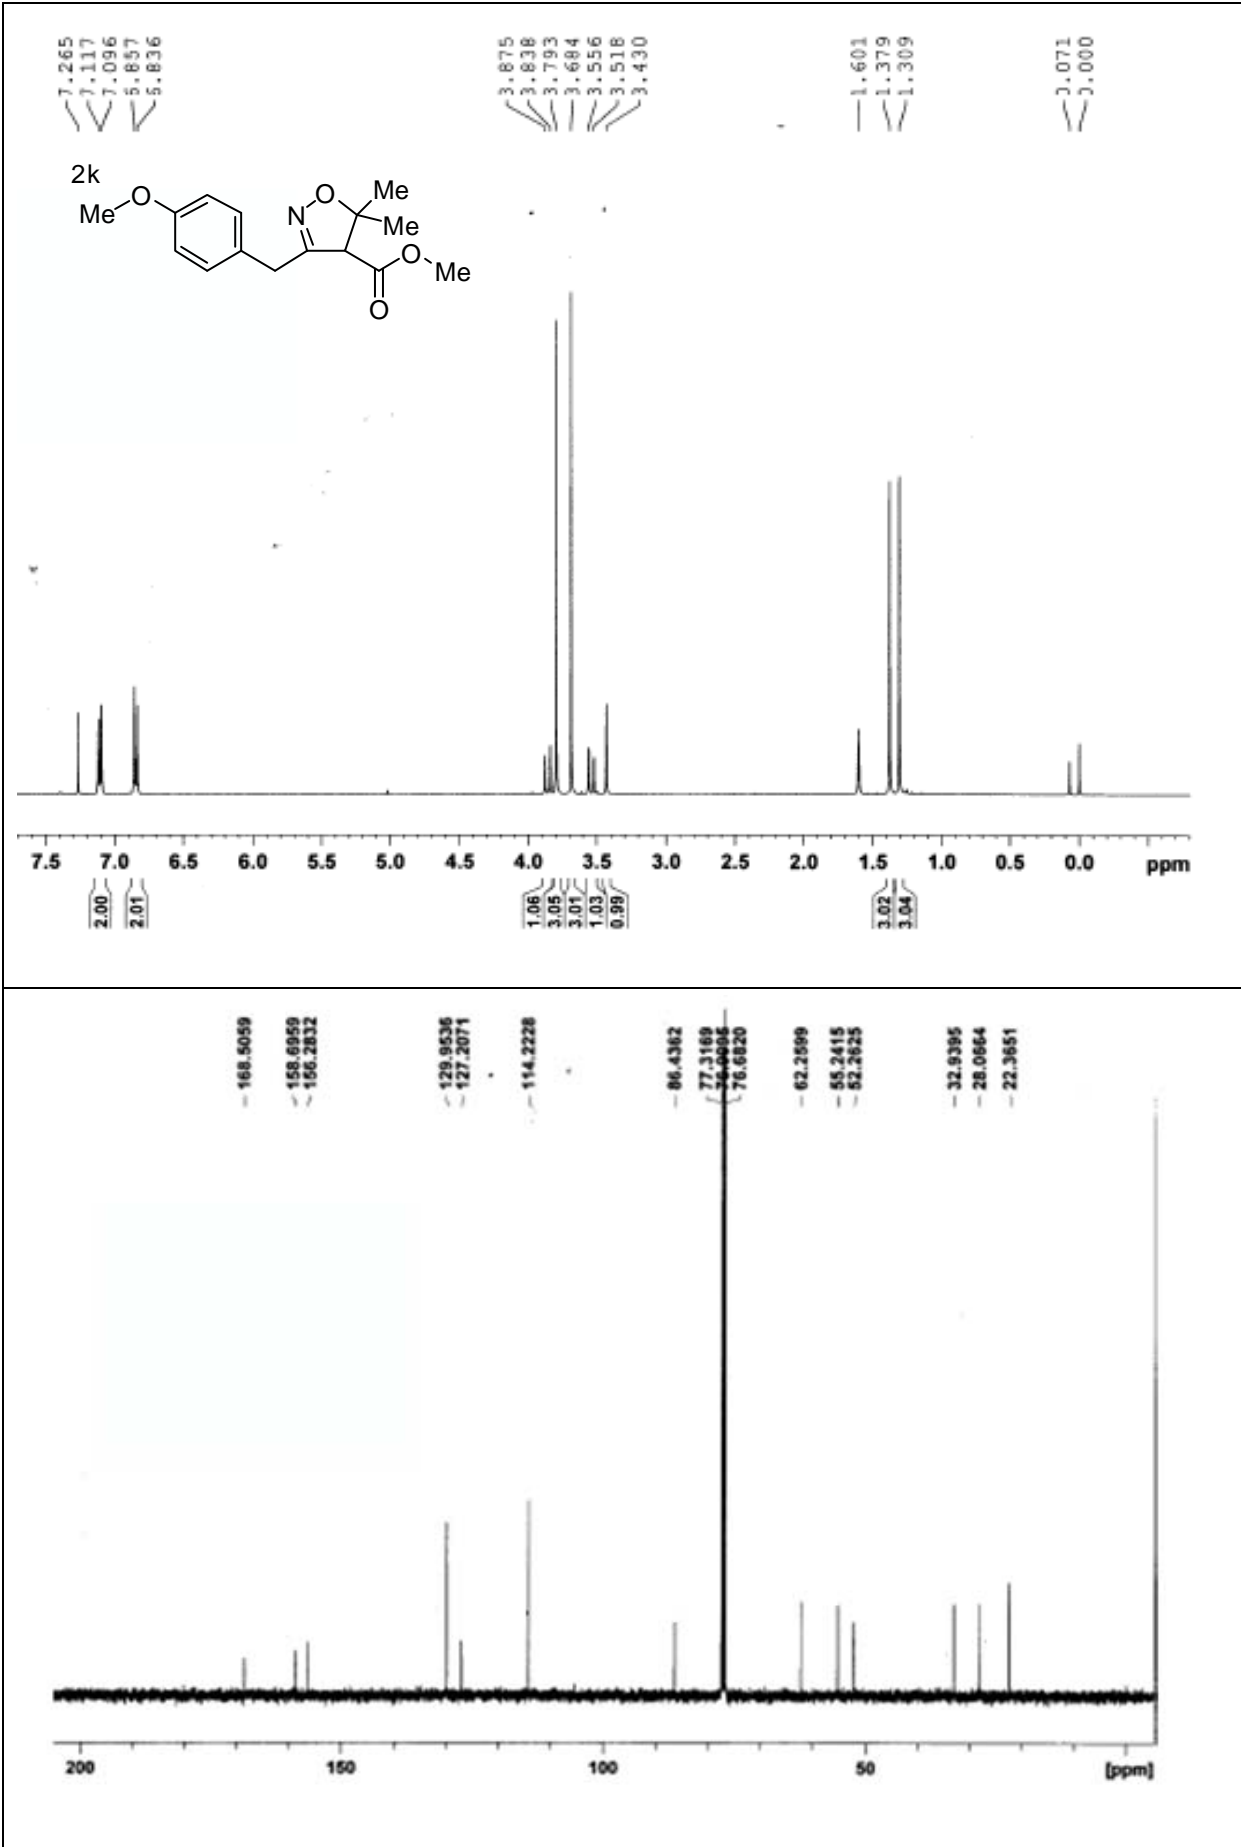

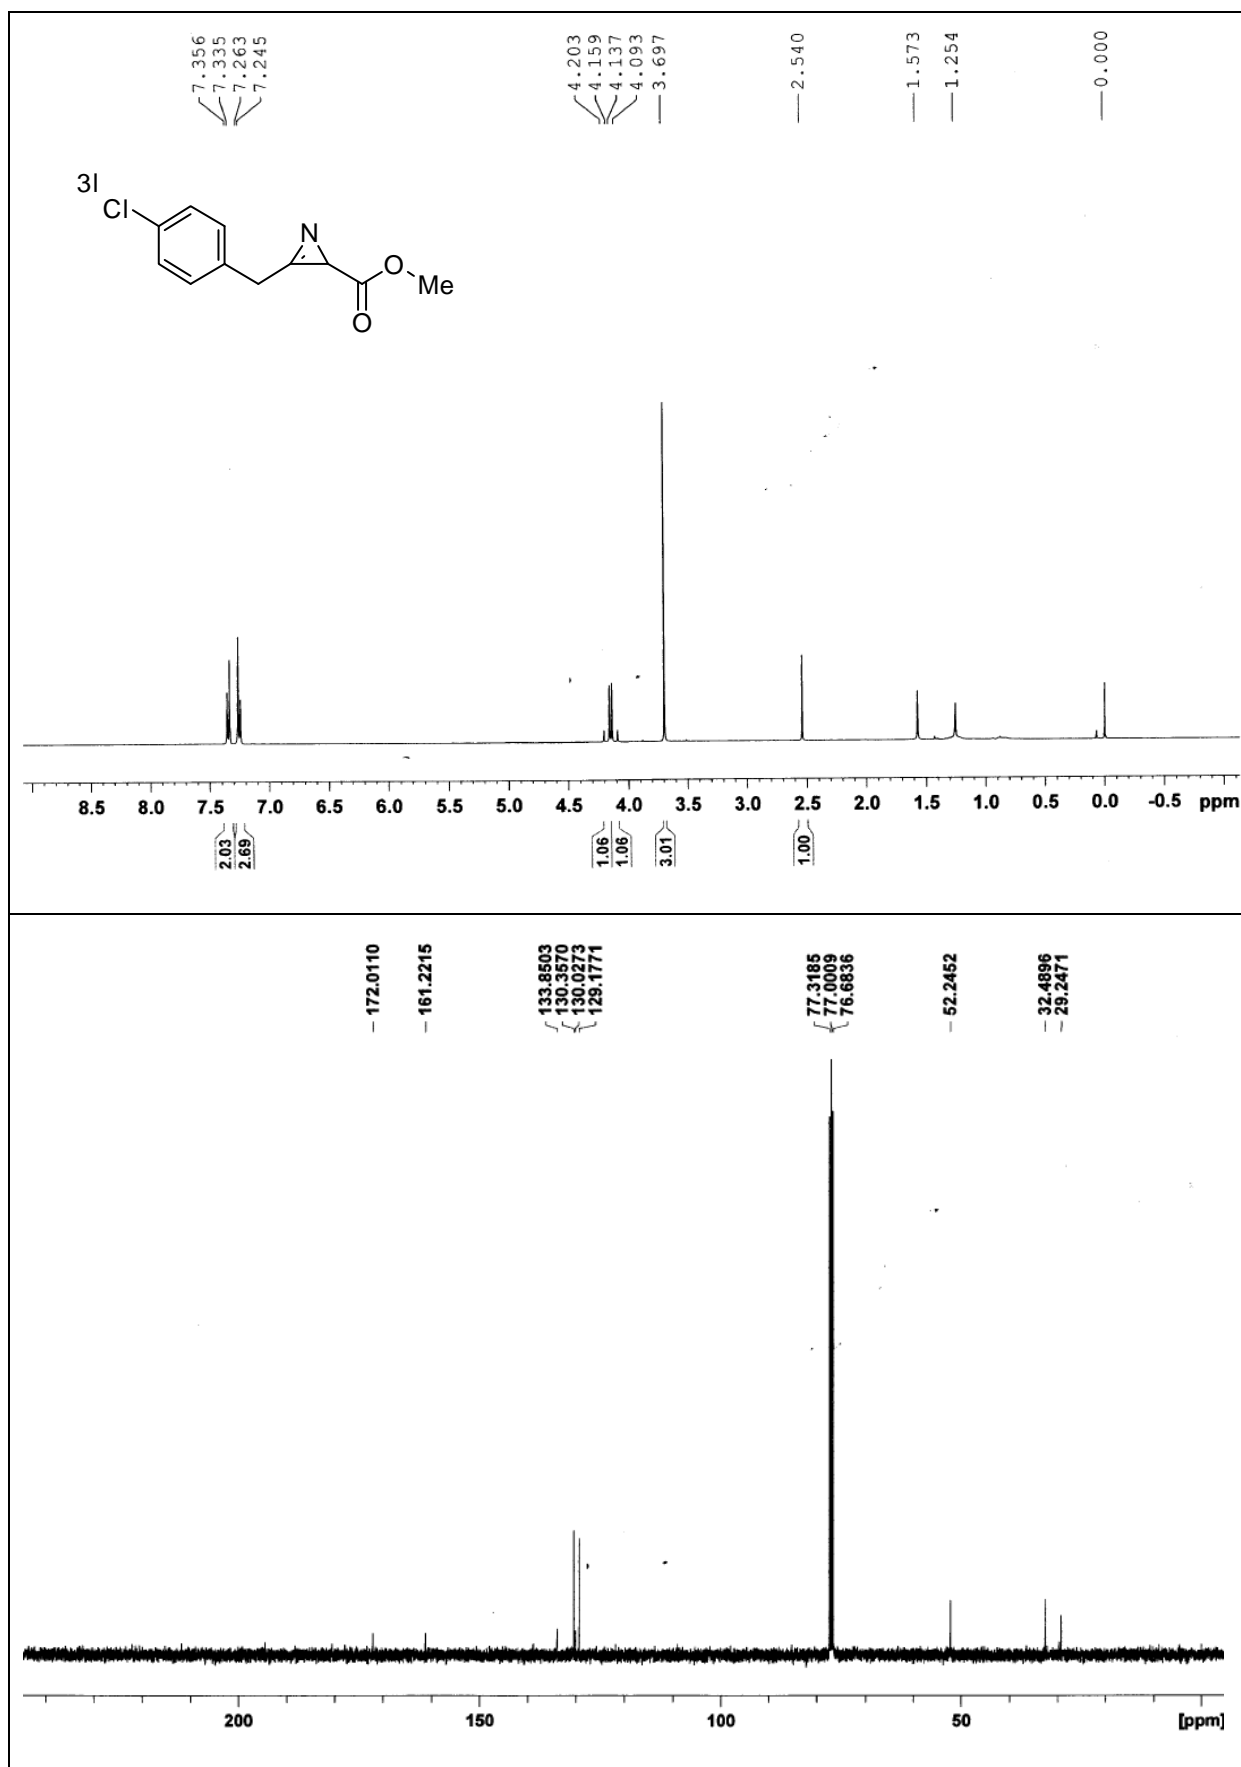

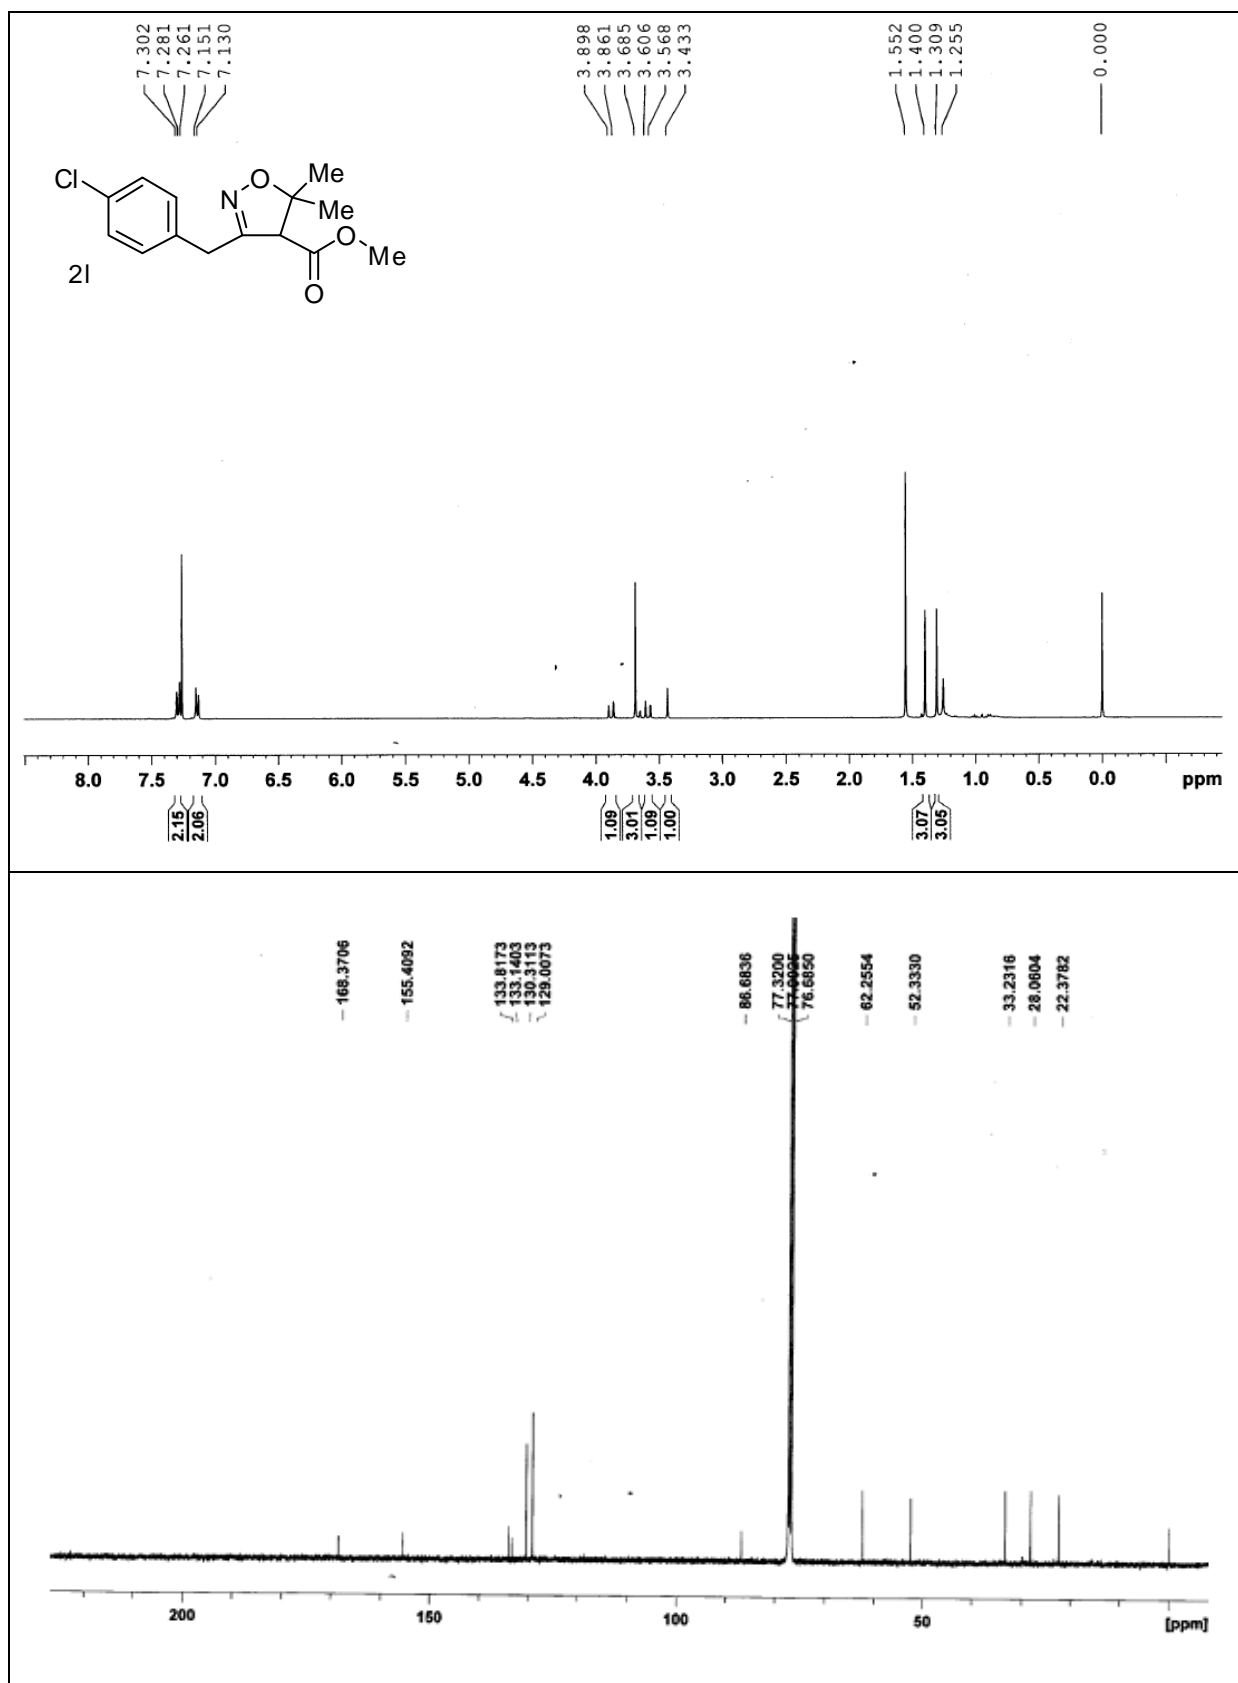

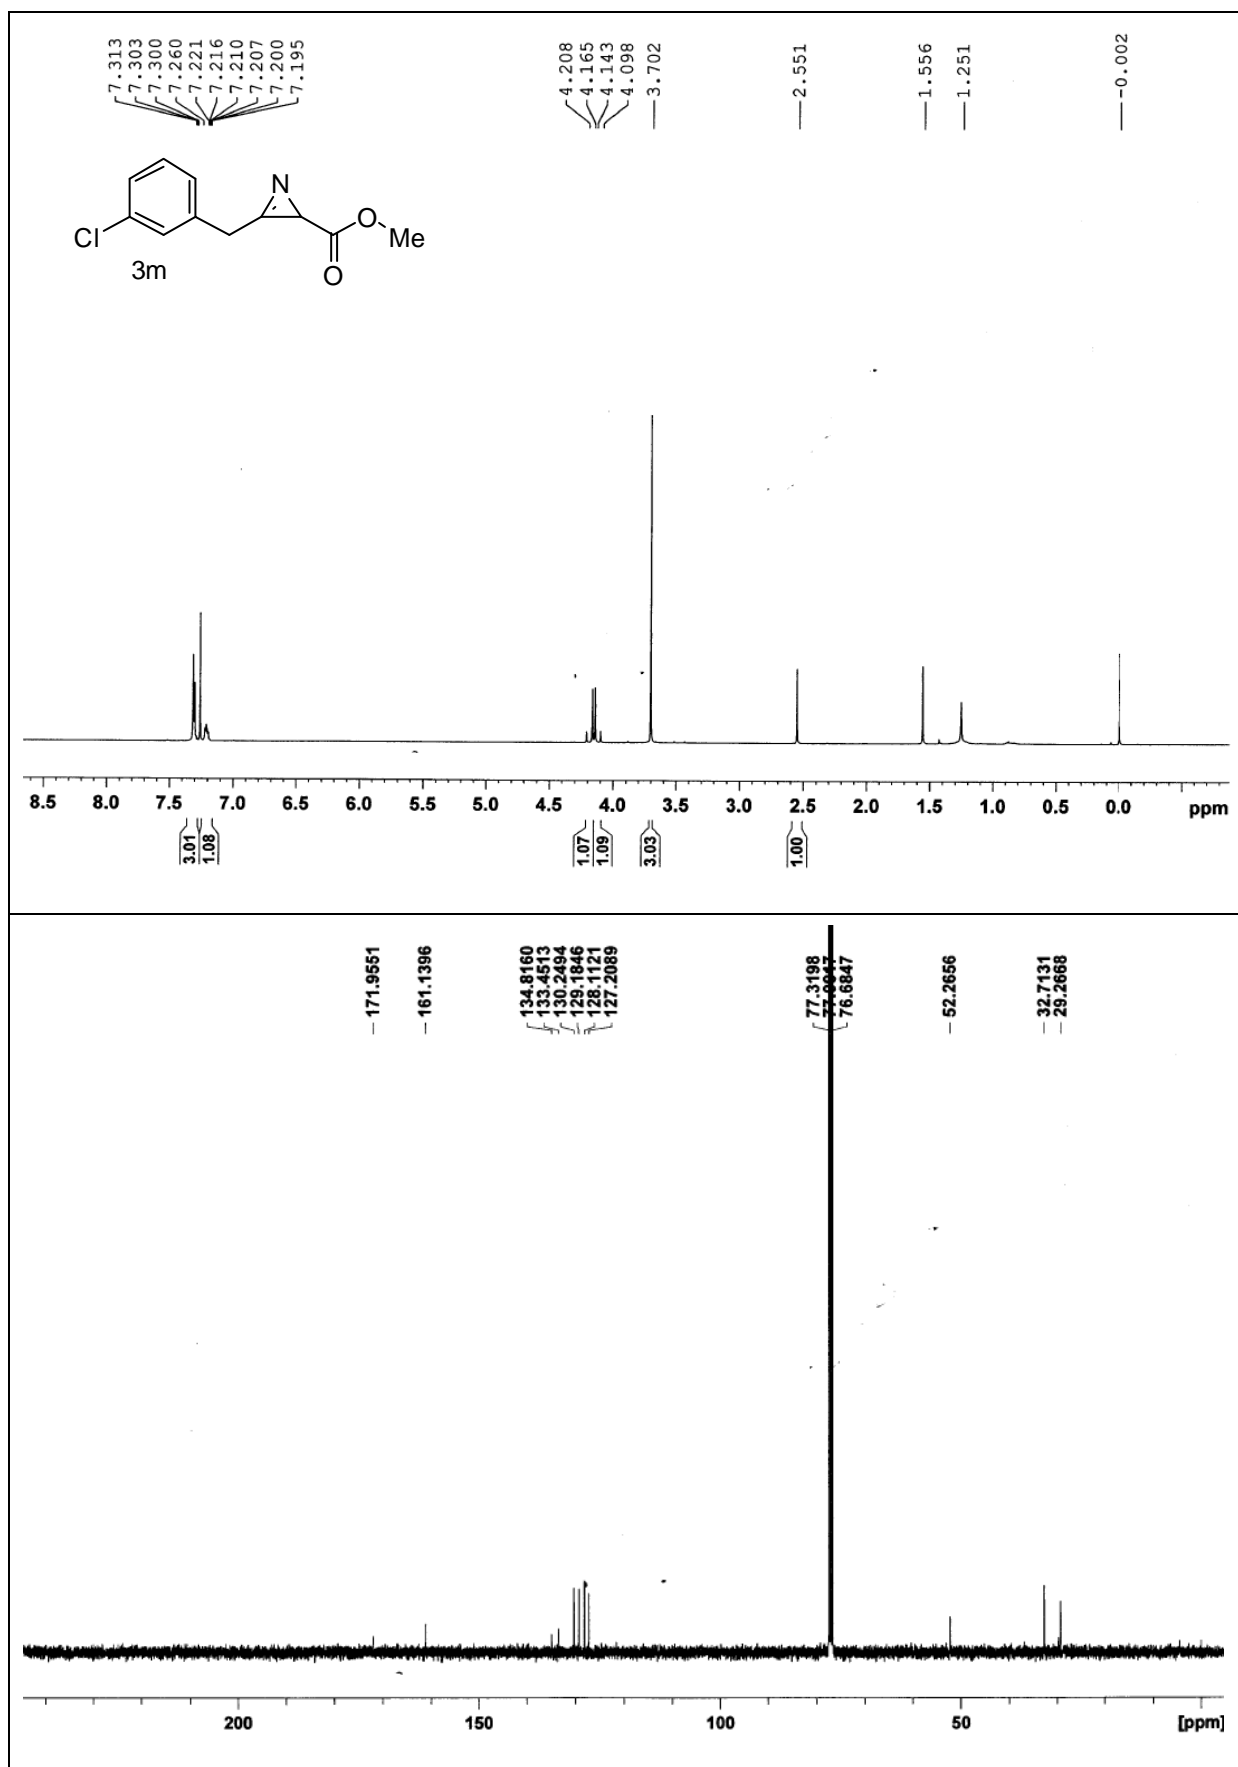

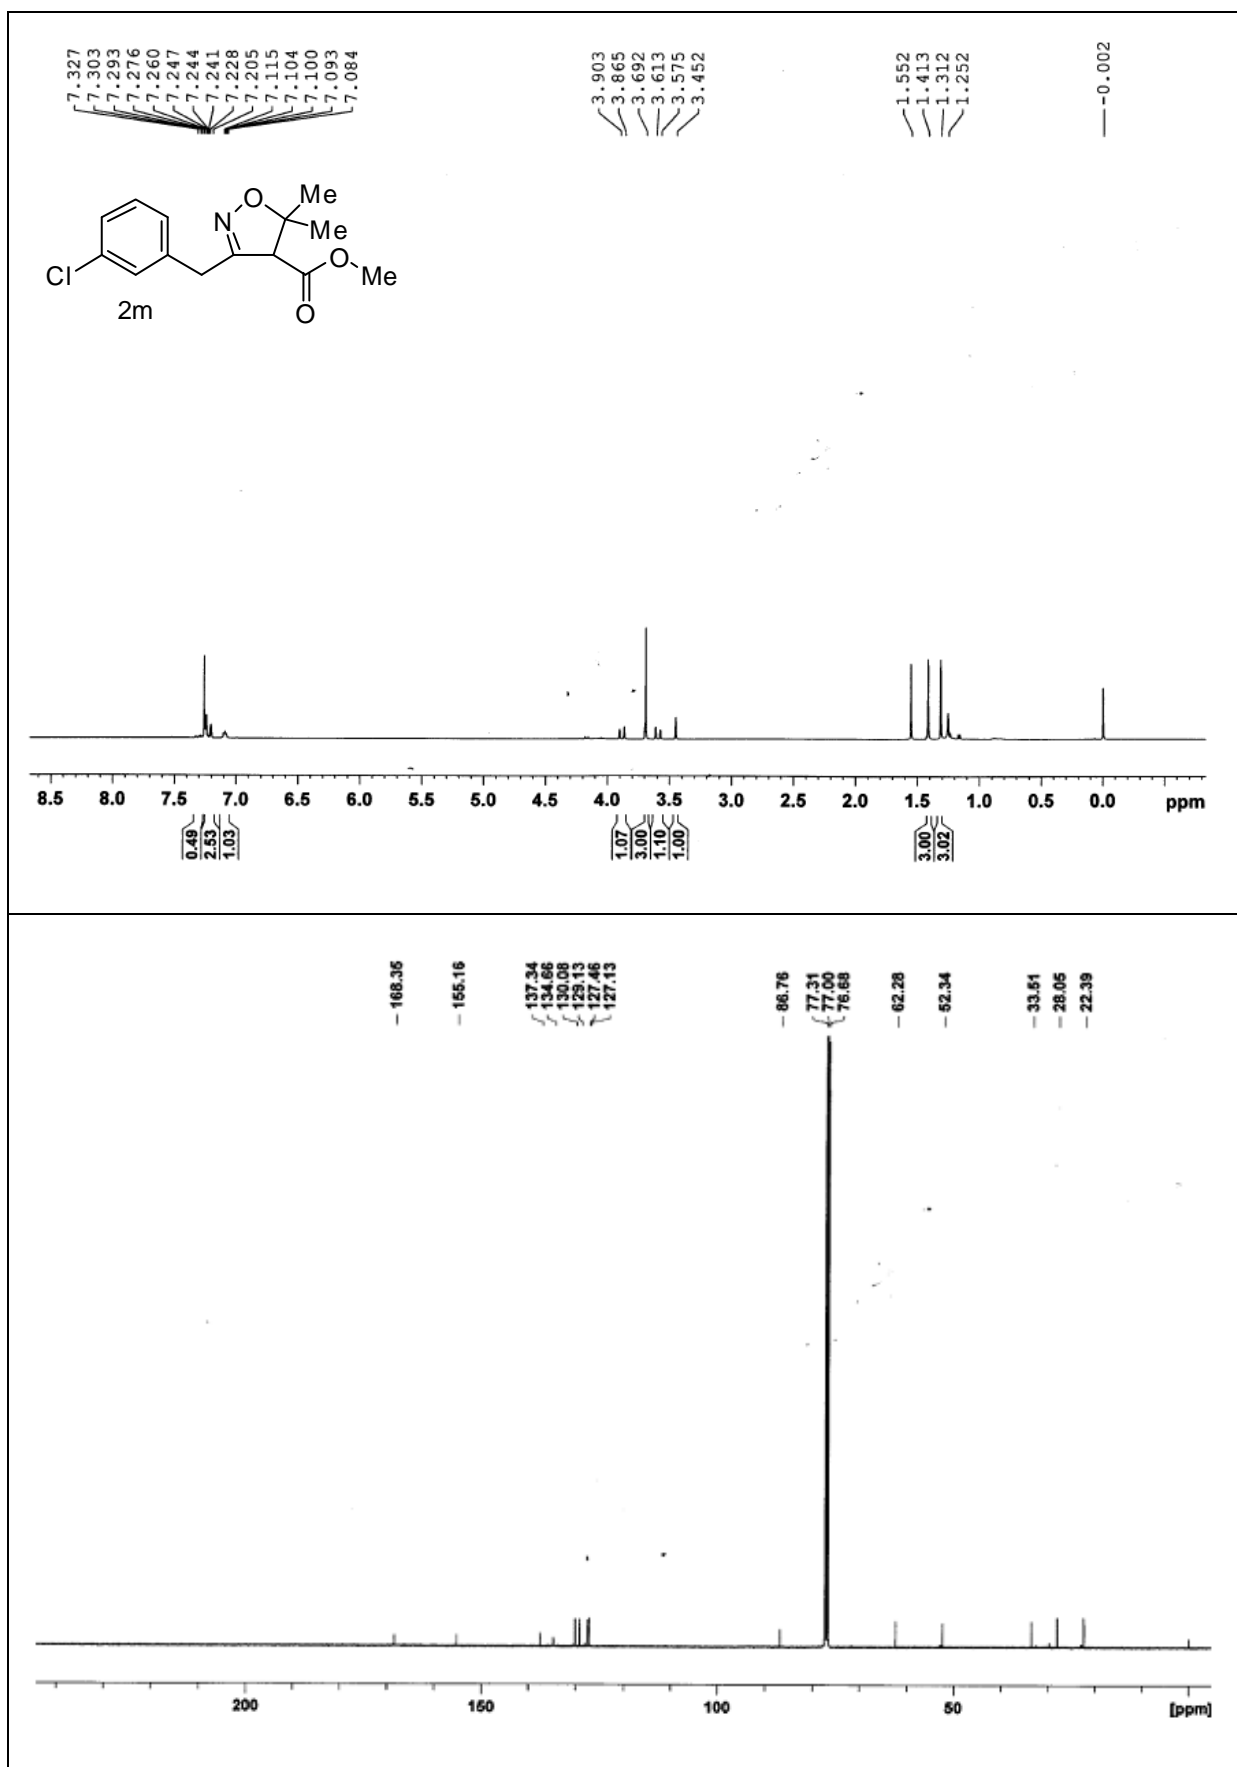

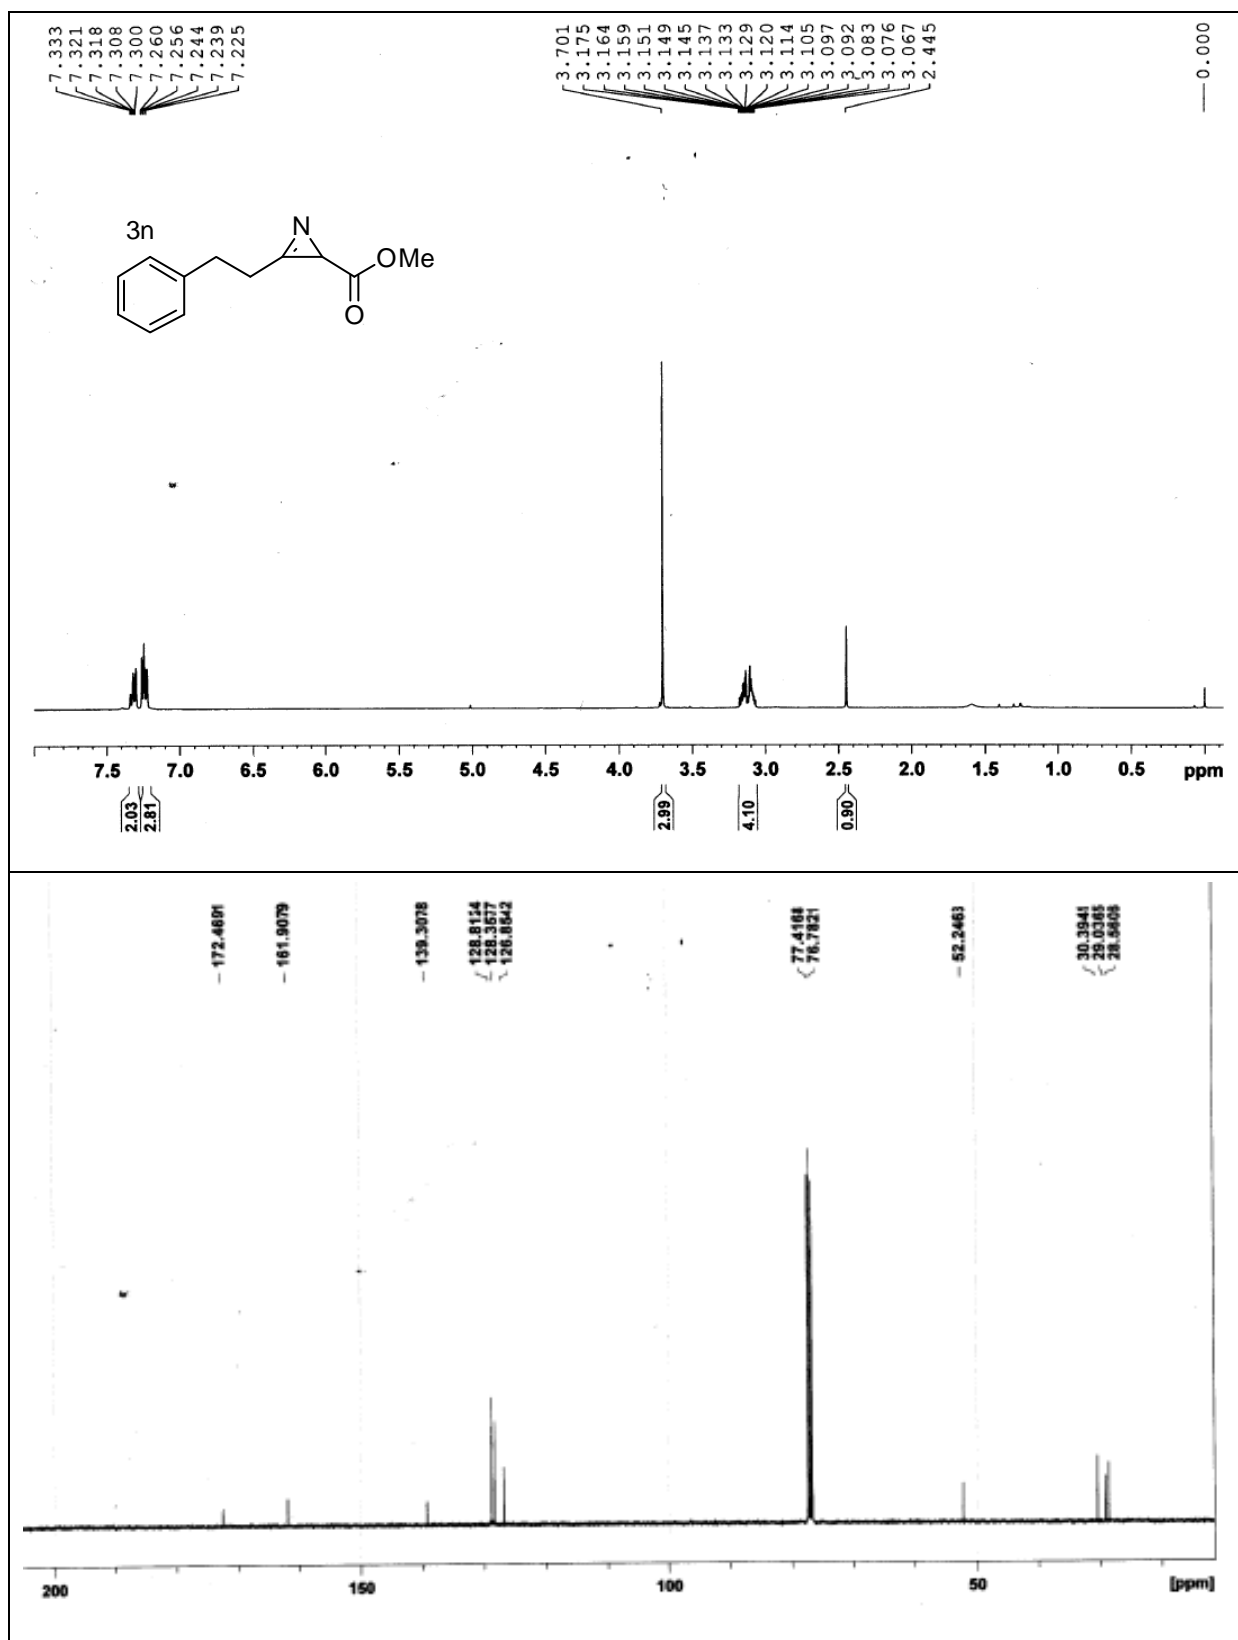

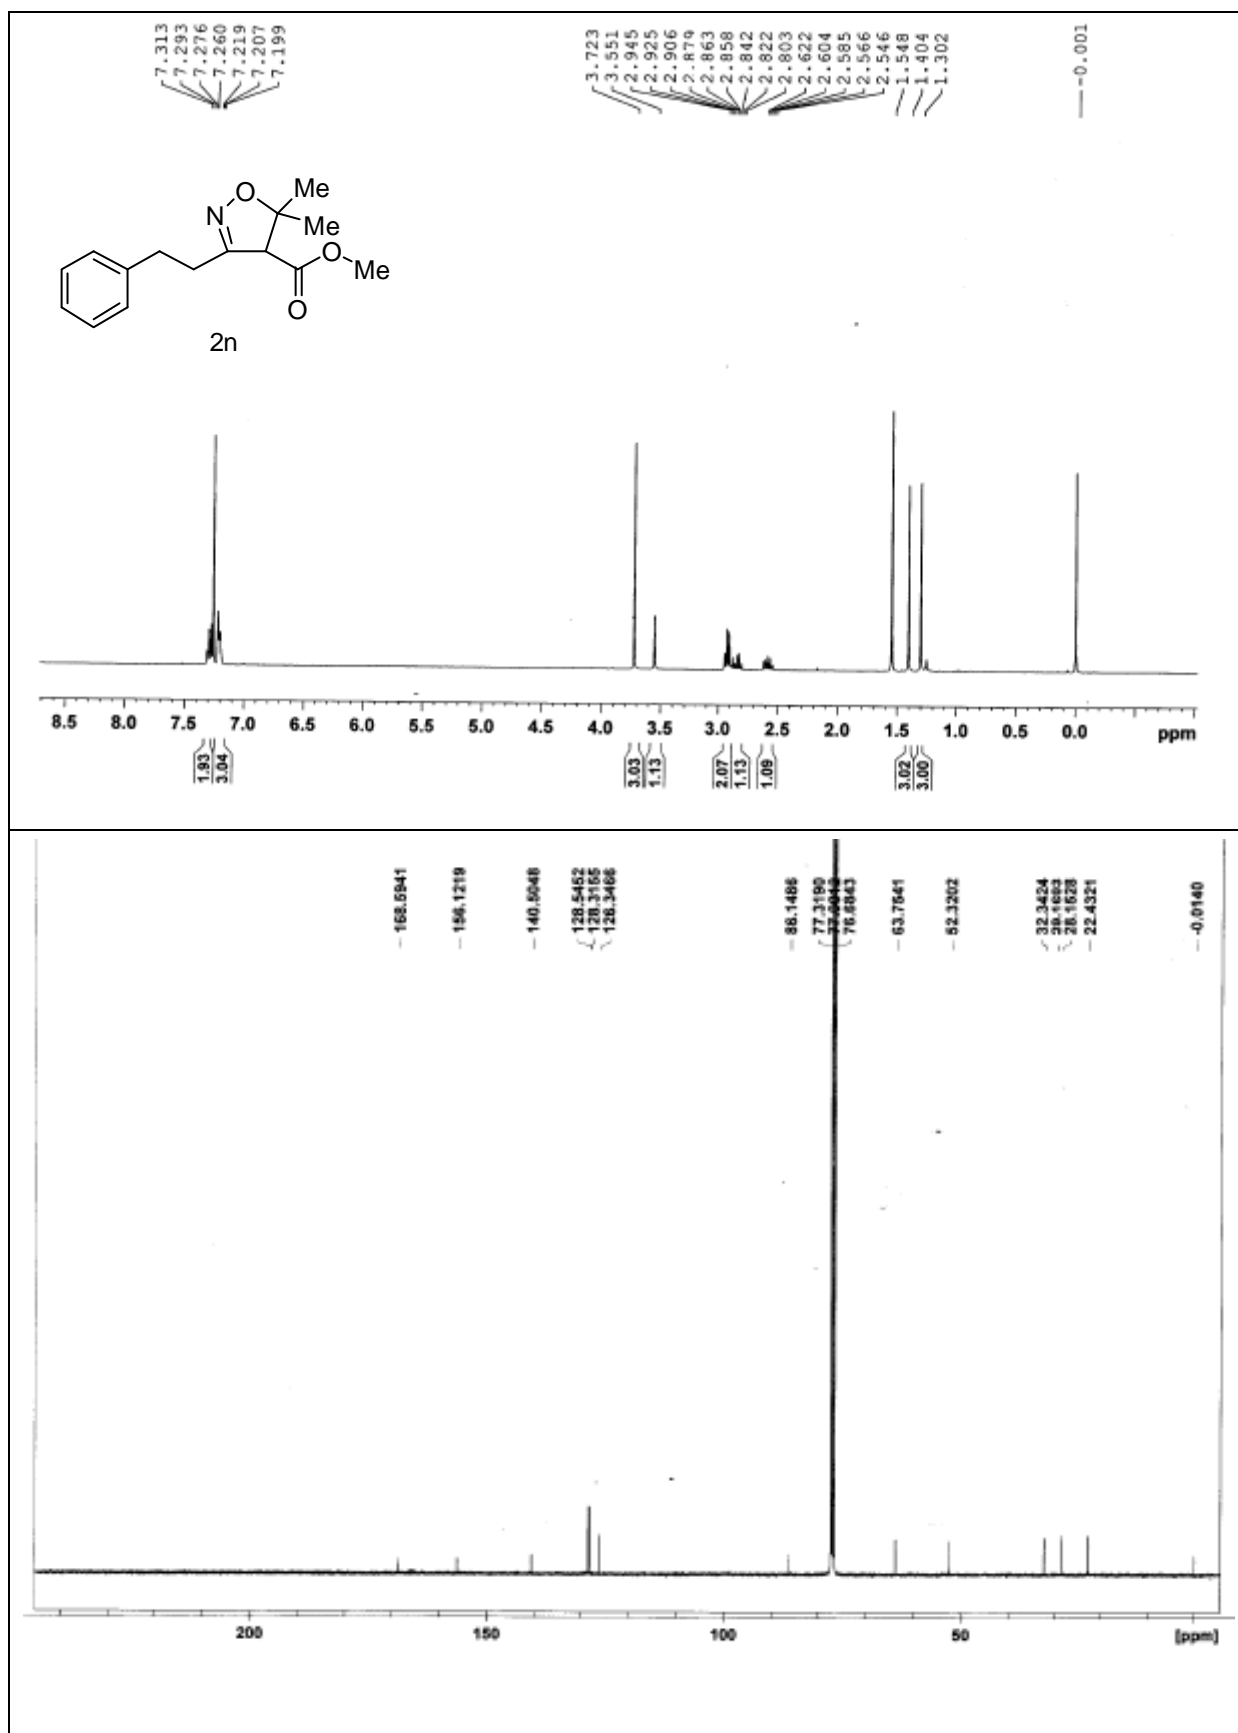

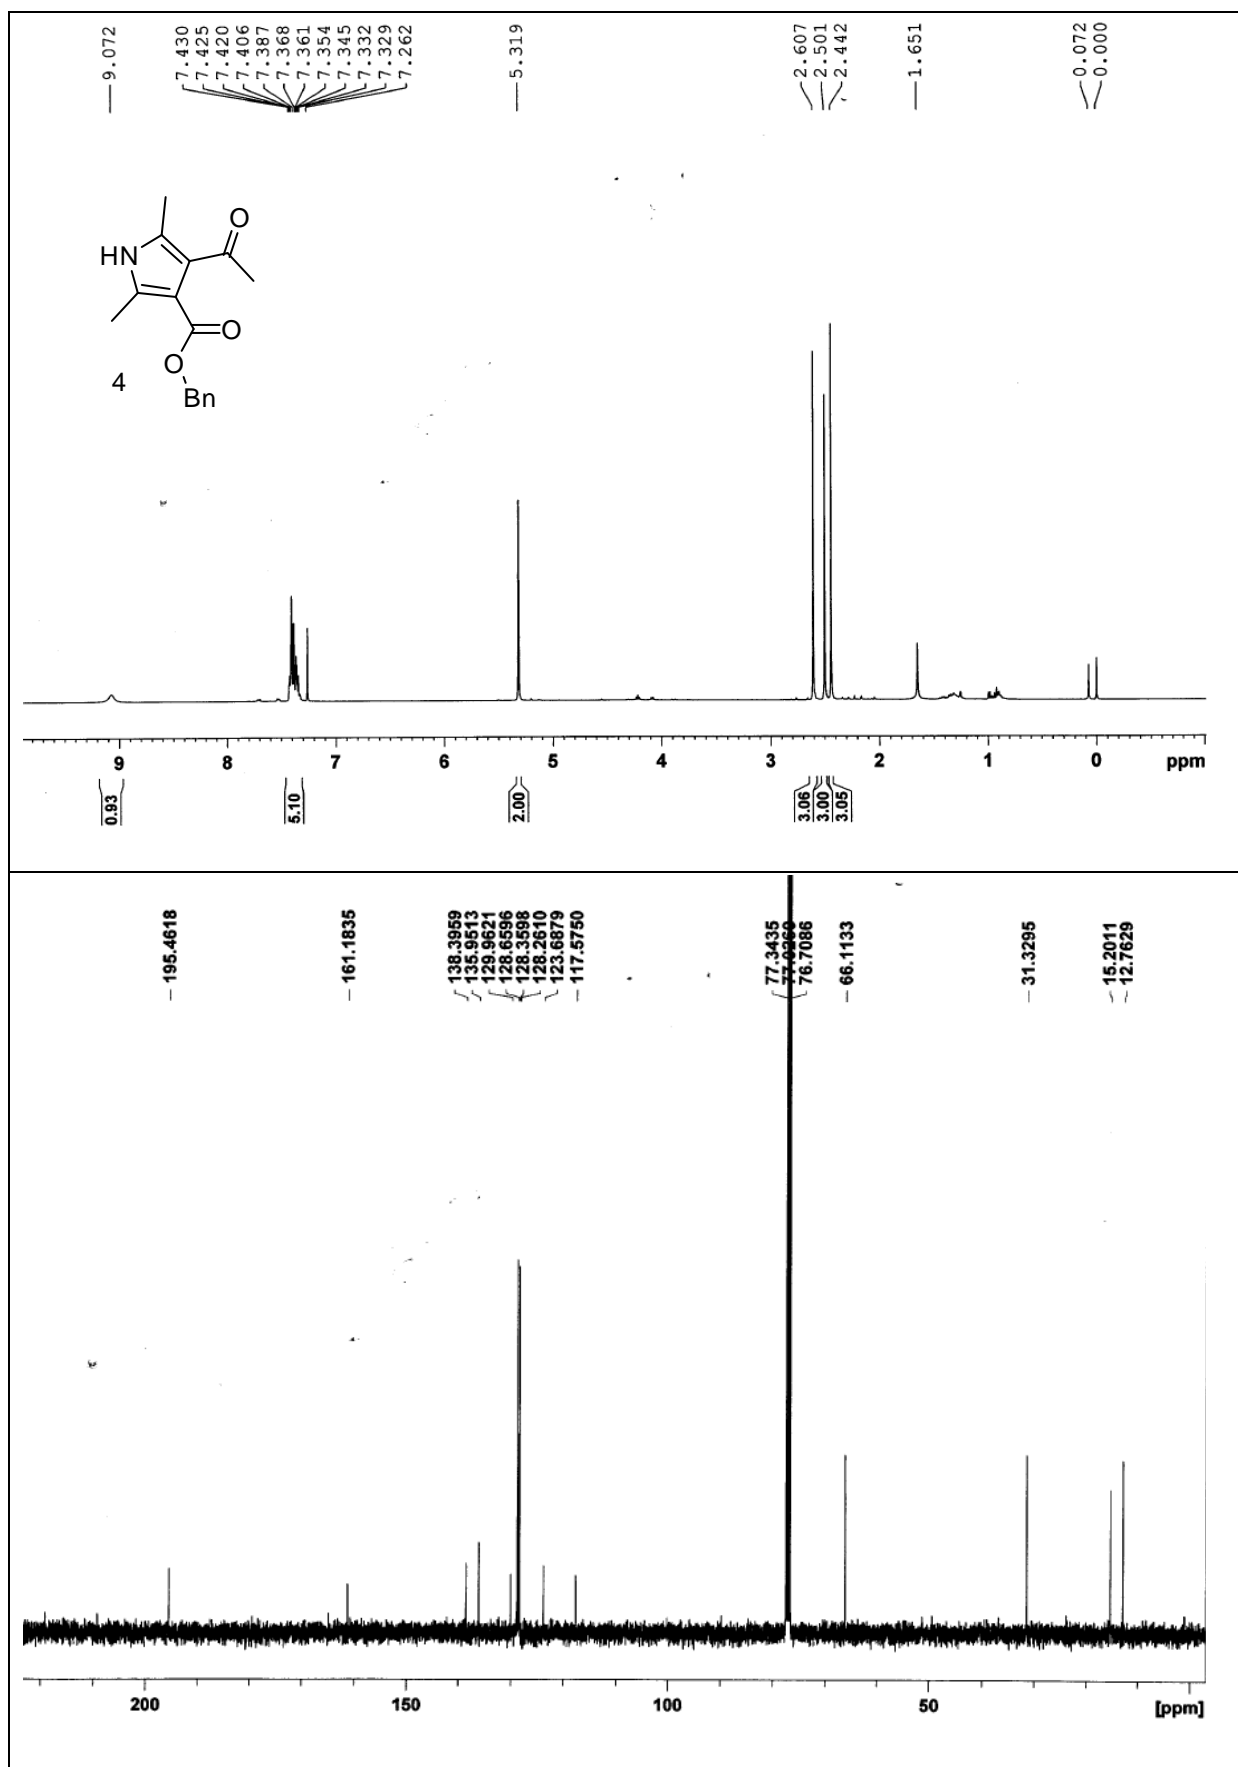

Supplement: c1cc11683e.pdf [file c1cc11683e.pdf]
